# Supplementary material for: Comprehensive Analysis of GDF10 Methylation Site-Associated Genes as Prognostic Markers for Endometrial Cancer
Source: Hindawi journal article supplement (doi:10.1155/2022/7117083), 2022-10-10
Supplement: f1 [file 7117083.f1.zip]

| submitter_id.samples | age     | Stage      | Grade      |
|----------------------|---------|------------|------------|
| TCGA-AJ-A3NE-01A     | 46.4575 | Stage IA   | G3         |
| TCGA-AX-A1C7-01A     | 77.2548 | Stage IB   | G3         |
| TCGA-AX-A3G8-01A     | 76.4356 | Stage IA   | G3         |
| TCGA-EO-A2CG-01A     | 69.2575 | Stage IA   | G3         |
| TCGA-AW-A1PO-01A     | 66.3699 | Stage IIIA | G3         |
| TCGA-AX-A1C5-01A     | 47.6247 | Stage IIIC | G3         |
| TCGA-AJ-A8CW-01A     | 64.5315 | Stage IA   | G2         |
| TCGA-FI-A2EY-01A     | 63.1288 | Stage IIIA | G3         |
| TCGA-A5-A2K3-01A     | 68.2384 | Stage IA   | G3         |
| TCGA-BG-A222-01A     | 49.9178 | Stage IA   | G3         |
| TCGA-A5-A7WJ-01A     | 64.9945 | Stage IA   | G2         |
| TCGA-EY-A548-01A     | 83.6822 | Stage IA   | G1         |
| TCGA-B5-A0K8-01A     | 71.211  | Stage IB   | G3         |
| TCGA-BG-A18B-01A     | 53.5616 | Stage I    | G2         |
| TCGA-AX-A2IN-01A     | 63.7671 | Stage IC   | G3         |
| TCGA-EO-A2CH-01A     | 73.8795 | Stage IVB  | G3         |
| TCGA-D1-A1NX-01A     | 66.9616 | Stage IIIC | G3         |
| TCGA-AX-A0IS-01A     | 52.5288 | Stage IC   | G2         |
| TCGA-AP-A1DQ-01A     | 76.2055 | Stage IIIC | High Grade |
| TCGA-B5-A11O-01A     | 62.2466 | Stage IA   | G1         |
| TCGA-PG-A6IB-01A     | 68.4082 | Stage IA   | G3         |
| TCGA-AX-A2HF-01A     | 67.6411 | Stage IB   | G3         |
| TCGA-EY-A72D-01A     | 87.1726 | Stage II   | G3         |
| TCGA-AP-A1DK-01A     | 53.4493 | Stage IA   | G3         |
| TCGA-D1-A103-01A     | 87.2356 | Stage IB   | G1         |
| TCGA-B5-A11G-01A     | 71.2192 | Stage IA   | G1         |
| TCGA-BG-A0YU-01A     | 37.3808 | Stage IA   | G1         |
| TCGA-AJ-A2QO-01A     | 85.5397 | Stage IB   | G3         |
| TCGA-BG-A220-01A     | 69.4411 | Stage IA   | G3         |
| TCGA-DF-A2KU-01A     | NA      | Stage IB   | G3         |
| TCGA-AJ-A3NC-01A     | 63.9808 | Stage IA   | G3         |
| TCGA-EO-A3B0-01A     | 43.7096 | Stage IIIC | G3         |
| TCGA-FI-A3PV-01A     | 68.2137 | Stage IA   | High Grade |
| TCGA-D1-A165-01A     | 64.4548 | Stage IIIA | G1         |
| TCGA-D1-A1O5-01A     | 61.863  | Stage IA   | G1         |
| TCGA-D1-A17C-01A     | 78.2767 | Stage IA   | G1         |
| TCGA-B5-A11W-01A     | 61.274  | Stage IB   | G2         |
| TCGA-EY-A1GS-01A     | 71.2658 | Stage IVB  | G3         |
| TCGA-D1-A3DH-01A     | 71.0548 | Stage IA   | G3         |
| TCGA-EO-A3L0-01A     | 76.7205 | Stage IA   | G3         |
| TCGA-SJ-A6ZJ-01A     | 61.9096 | Stage IB   | G2         |
| TCGA-BS-A0V6-01A     | 55.8055 | Stage IB   | G1         |
| TCGA-BG-A2AE-01A     | 57.7233 | Stage IB   | G3         |
| TCGA-AX-A2HD-01A     | 69.8603 | Stage IIIA | G3         |

|                  |                             |
|------------------|-----------------------------|
| TCGA-AJ-A3TW-01A | 78.2438 Stage IB G3         |
| TCGA-BK-A26L-01A | 71.2384 Stage IIICG3        |
| TCGA-D1-A2G6-01A | 53.5534 Stage IIICG3        |
| TCGA-AJ-A3QS-01A | 57.9781 Stage IIIAG3        |
| TCGA-AX-A1CF-01A | 69.3151 Stage IVBG3         |
| TCGA-DI-A2QU-01A | 67.0904 Stage IVBG3         |
| TCGA-AX-A1CP-01A | 84.211 Stage IA G3          |
| TCGA-AX-A1CN-01A | 54.411 Stage IIB G3         |
| TCGA-BG-A3PP-01A | 82.8137 Stage II G3         |
| TCGA-D1-A16J-01A | 61.1479 Stage IIB G2        |
| TCGA-EO-A3KX-01A | 80.1644 Stage IA G3         |
| TCGA-D1-A0ZP-01A | 59.126 Stage IVAG3          |
| TCGA-D1-A0ZR-01A | 57.9644 Stage IB G2         |
| TCGA-D1-A2G0-01A | 70.063 Stage IB G3          |
| TCGA-B5-A3F9-01A | 56.2274 Stage IB G3         |
| TCGA-D1-A102-01A | 49.2904 Stage IB G2         |
| TCGA-D1-A17L-01A | 81.9151 Stage IA G1         |
| TCGA-BG-A0YV-01A | 67.3068 Stage IIIAG3        |
| TCGA-AJ-A8CV-01A | 58.4548 Stage IB G2         |
| TCGA-A5-A2K7-01A | 41.0411 Stage II G3         |
| TCGA-EO-A22U-01A | 83.7178 Stage IB G3         |
| TCGA-D1-A3JQ-01A | 61.0877 Stage IIICG3        |
| TCGA-D1-A16G-01A | 74.1507 Stage IV High Grade |
| TCGA-AX-A3G6-01A | 67.6192 Stage IA G2         |
| TCGA-SL-A6JA-01A | 77.811 Stage IB G3          |
| TCGA-AX-A06D-01A | 82.2575 Stage IIIAG2        |
| TCGA-AX-A0IZ-01A | 53.0521 Stage IB G3         |
| TCGA-FI-A2CY-01A | 60.5425 Stage IA G3         |
| TCGA-A5-A1OJ-01A | 31.8767 Stage IA G2         |
| TCGA-D1-A16Y-01A | 56.0411 Stage IB G1         |
| TCGA-EY-A214-01A | 66.126 Stage IIICG3         |
| TCGA-D1-A16Q-01A | 54.4466 Stage II G2         |
| TCGA-D1-A2G5-01A | 50.1973 Stage IB G3         |
| TCGA-FI-A2EX-01A | 58.874 Stage IIIAG3         |
| TCGA-QS-A5YR-01A | 61.2932 Stage IIIBG2        |
| TCGA-EY-A549-01A | 78.274 Stage IA G3          |
| TCGA-QS-A8F1-01A | 85.989 Stage IIIAG3         |
| TCGA-EO-A1Y5-01A | 63.7014 Stage IIICG3        |
| TCGA-BK-A6W4-01A | 62.3726 Stage IA G2         |
| TCGA-AJ-A3NF-01A | 60.8493 Stage IIICG3        |
| TCGA-A5-A0G1-01A | 67.0603 Stage IA G3         |
| TCGA-AJ-A2QK-01A | 65.6027 Stage IA G3         |
| TCGA-B5-A3FB-01A | 73.3671 Stage IB G3         |
| TCGA-AJ-A3EL-01A | 47.7863 Stage IA G3         |
| TCGA-EY-A212-01A | 84.0548 Stage IIICG3        |

|                  |         |            |    |
|------------------|---------|------------|----|
| TCGA-AP-A1E1-01A | 74.1699 | Stage IA   | G2 |
| TCGA-AX-A2H7-01A | 87.9452 | Stage IC   | G3 |
| TCGA-AJ-A23N-01A | 70.6082 | Stage IIIA | G3 |
| TCGA-QS-A5YQ-01A | 55.9589 | Stage IIIA | G1 |
| TCGA-AX-A1CI-01A | 61.8685 | Stage IB   | G1 |
| TCGA-AX-A3GB-01A | 73.2164 | Stage IB   | G3 |
| TCGA-AP-A0LS-01A | 63.3589 | Stage IA   | G2 |
| TCGA-B5-A121-01A | 57.5836 | Stage IIIA | G1 |
| TCGA-BS-A0UL-01A | 54.7452 | Stage IA   | G1 |
| TCGA-PG-A5BC-01A | 72.4274 | Stage II   | G3 |
| TCGA-EY-A1GM-01A | 60.3014 | Stage IIIA | G3 |
| TCGA-EO-A3AU-01A | 72.3452 | Stage II   | G3 |
| TCGA-FI-A2F9-01A | 79.1397 | Stage IA   | G3 |
| TCGA-AP-A5FX-01A | 68.6658 | Stage IIIC | G3 |
| TCGA-E6-A2P8-01A | 53.2822 | Stage IV   | G3 |
| TCGA-EY-A1GF-01A | 75.2055 | Stage IA   | G2 |
| TCGA-DI-A1NN-01A | 63.0849 | Stage IIIC | G3 |
| TCGA-BK-A56F-01A | 75.4055 | Stage IB   | G1 |
| TCGA-DF-A2KZ-01A | 87.5973 | Stage IB   | G3 |
| TCGA-BG-A0W2-01A | 57.5288 | Stage IA   | G1 |
| TCGA-EO-A22T-01A | 56.4603 | Stage II   | G3 |
| TCGA-AX-A3FS-01A | 82.4712 | Stage IA   | G3 |
| TCGA-B5-A0KB-01A | 62.1068 | Stage IB   | G3 |
| TCGA-AX-A3G1-01A | 85.0329 | Stage IC   | G3 |
| TCGA-EY-A1GU-01A | 66.5863 | Stage IB   | G2 |
| TCGA-EY-A1GT-01A | 68.9068 | Stage IIIA | G1 |
| TCGA-A5-A0VO-01A | 64.5123 | Stage IB   | G2 |
| TCGA-EY-A1GD-01A | 51.063  | Stage IA   | G1 |
| TCGA-E6-A1LZ-01A | 76.8603 | Stage IA   | G3 |
| TCGA-BG-A187-01A | 66.0247 | Stage IB   | G2 |
| TCGA-AJ-A23O-01A | 69.6795 | Stage IB   | G3 |
| TCGA-4E-A92E-01A | 54.2959 | Stage I    | G1 |
| TCGA-D1-A0ZU-01A | 34.1315 | Stage IB   | G2 |
| TCGA-AJ-A3IA-01A | 78      | Stage IB   | G3 |
| TCGA-DF-A2KV-01A | 55.2329 | Stage IB   | G3 |
| TCGA-D1-A0ZS-01A | 54.3041 | Stage IB   | G3 |
| TCGA-PG-A915-01A | 60.6    | Stage IA   | G3 |
| TCGA-EY-A1G8-01A | 83.6082 | Stage IB   | G3 |
| TCGA-A5-A2K5-01A | 76.8685 | Stage IA   | G3 |
| TCGA-AJ-A3NG-01A | 83.1534 | Stage II   | G3 |
| TCGA-B5-A11N-01A | 69.7041 | Stage IA   | G1 |
| TCGA-5B-A90C-01A | 69.9123 | Stage IA   | G2 |
| TCGA-AP-A1E4-01A | 54.2849 | Stage IB   | G2 |
| TCGA-B5-A11J-01A | 64.3425 | Stage IA   | G2 |
| TCGA-B5-A11I-01A | 65.3616 | Stage IVB  | G3 |

|                  |                    |            |
|------------------|--------------------|------------|
| TCGA-BK-A4ZD-01A | 42.5644 Stage IA   | G3         |
| TCGA-AX-A0J0-01A | 47.8521 Stage IB   | G2         |
| TCGA-B5-A5OE-01A | 68.2329 Stage IIIC | G3         |
| TCGA-EY-A547-01A | 75.8521 Stage IA   | G3         |
| TCGA-FI-A2F8-01A | 64.7918 Stage II   | G3         |
| TCGA-B5-A5OD-01A | 67.8767 Stage IIIC | G3         |
| TCGA-A5-A0GG-01A | 76.189 Stage IA    | G1         |
| TCGA-EY-A3L3-01A | 82.5699 Stage IA   | G3         |
| TCGA-B5-A11S-01A | 63.2466 Stage IA   | G2         |
| TCGA-AX-A3G9-01A | 64.0027 Stage IIIC | G3         |
| TCGA-E6-A8L9-01A | 61.1863 Stage IB   | G3         |
| TCGA-D1-A17A-01A | 59.0685 Stage IIA  | G3         |
| TCGA-AJ-A5DW-01A | 56.7425 Stage IA   | G2         |
| TCGA-D1-A177-01A | 70.1425 Stage IB   | G2         |
| TCGA-D1-A3DG-01A | 81.5644 Stage IVB  | G3         |
| TCGA-AP-A3K1-01A | 56.4219 Stage IVB  | High Grade |
| TCGA-AJ-A2QL-01A | 60.4301 Stage IIIC | G3         |
| TCGA-B5-A1N2-01A | 70.1699 Stage IIIC | G3         |
| TCGA-KP-A3W3-01A | 72.0822 Stage IB   | G3         |
| TCGA-A5-A1OK-01A | 63.5041 Stage IIIA | G3         |
| TCGA-D1-A1O8-01A | 70.6548 Stage IIIC | G3         |
| TCGA-BG-A0VW-01A | 77.7616 Stage IA   | G1         |
| TCGA-D1-A167-01A | 70.0685 Stage IC   | G2         |
| TCGA-FI-A2F4-01A | 64.7151 Stage IC   | G3         |
| TCGA-AX-A2HA-01A | 36.0055 Stage IB   | G3         |
| TCGA-A5-A3LO-01A | 64.1123 Stage IB   | G3         |
| TCGA-BK-A13B-01A | 58.8849 Stage IB   | G3         |
| TCGA-DI-A1BY-01A | 63.3233 Stage IIB  | G2         |
| TCGA-K6-A3WQ-01A | 60.526 Stage IVB   | G3         |
| TCGA-AX-A1CE-01A | 60.189 Stage IB    | G3         |
| TCGA-EO-A22Y-01A | 68.8411 Stage IA   | G3         |
| TCGA-AX-A3FT-01A | 64.5014 Stage IB   | G3         |
| TCGA-D1-A15Z-01A | 72.9808 Stage IB   | G2         |
| TCGA-BG-A0MH-01A | 61.5753 Stage IC   | G2         |
| TCGA-D1-A15V-01A | 68.1808 Stage IB   | G3         |
| TCGA-JU-AAVI-01A | 61.0658 Stage IIIC | G3         |
| TCGA-QF-A5YT-01A | 57.4822 Stage II   | G1         |
| TCGA-D1-A16S-01A | 70.3836 Stage IIIC | High Grade |
| TCGA-BK-A0CA-01A | 61.3096 Stage IIIC | G3         |
| TCGA-AX-A3G7-01A | 71.7452 Stage IVB  | G3         |
| TCGA-SL-A6J9-01A | 73.1534 Stage IB   | G3         |
| TCGA-AJ-A3I9-01A | 52.4356 Stage II   | G3         |
| TCGA-B5-A11E-01A | 53.3096 Stage IB   | G3         |
| TCGA-BG-A221-01A | 84.8219 Stage IB   | G3         |
| TCGA-A5-A1OG-01A | 65.6329 Stage IIIC | G3         |

|                  |                             |
|------------------|-----------------------------|
| TCGA-BG-A0MA-01A | 60.3726 Stage IB G3         |
| TCGA-D1-A1NY-01A | 67.6247 Stage IB G3         |
| TCGA-B5-A11Q-01A | 64.4877 Stage IIIAG1        |
| TCGA-AJ-A3BD-01A | 57.5288 Stage IIICG3        |
| TCGA-A5-A2K2-01A | 77.9616 Stage IA G3         |
| TCGA-AX-A3G3-01A | 58.3781 Stage IIIAG3        |
| TCGA-B5-A11V-01A | 64.7397 Stage IA G1         |
| TCGA-AJ-A5DV-01A | 65.4575 Stage IA G3         |
| TCGA-D1-A15W-01A | 59.0274 Stage IIICG1        |
| TCGA-E6-A1LX-01A | 40.3589 Stage IB G3         |
| TCGA-EY-A4KR-01A | 56.6274 Stage IIICG3        |
| TCGA-D1-A17H-01A | 61.3397 Stage IB G1         |
| TCGA-B5-A1MU-01A | 79.526 Stage IVBG3          |
| TCGA-AX-A06H-01A | 61.0137 Stage IIIAG1        |
| TCGA-AX-A1C4-01A | 52.6274 Stage IB G2         |
| TCGA-EY-A2ON-01A | 61.9836 Stage IVBG3         |
| TCGA-PG-A916-01A | 70.1836 Stage I G2          |
| TCGA-AX-A3G4-01A | 60.5452 Stage IIICG3        |
| TCGA-DF-A2L0-01A | 60.8219 Stage IIICG3        |
| TCGA-D1-A17T-01A | 67.5397 Stage IA G2         |
| TCGA-AJ-A3OL-01A | 55.1096 Stage IIIAG3        |
| TCGA-AP-A05O-01A | 68.4329 Stage IB G3         |
| TCGA-A5-A1OF-01A | 47.4192 Stage IA High Grade |
| TCGA-BG-A0W1-01A | 89.726 Stage II G2          |
| TCGA-BG-A0VZ-01A | 58.6685 Stage IIIAG1        |
| TCGA-AJ-A3EJ-01A | 74.8411 Stage IIICG3        |
| TCGA-D1-A1O7-01A | 60.3753 Stage IA G1         |
| TCGA-EY-A1GH-01A | 70.6904 Stage IA G2         |
| TCGA-EO-A1Y8-01A | 87.5918 Stage IA G3         |
| TCGA-A5-A3LP-01A | 74.3315 Stage IB G3         |
| TCGA-B5-A11F-01A | 55.263 Stage IA G2          |
| TCGA-D1-A1O0-01A | 77.1562 Stage IA G3         |
| TCGA-EC-A1NJ-01A | 73.9781 Stage IA G2         |
| TCGA-EO-A22X-01A | 36.2877 Stage IIIAG3        |
| TCGA-E6-A1M0-01A | 56.5178 Stage IIICG3        |
| TCGA-AX-A3FZ-01A | 33.7836 Stage IIIBG3        |
| TCGA-BS-A0VI-01A | 58.0767 Stage IIB G3        |
| TCGA-KP-A3W1-01A | 76.4438 Stage IA G3         |
| TCGA-KP-A3W0-01A | 72.2685 Stage IB G3         |
| TCGA-BS-A0V7-01A | 48.7945 Stage IB G1         |
| TCGA-A5-A0GR-01A | 69.4603 Stage IA G2         |
| TCGA-EO-A3AS-01A | 86.1644 Stage IA G3         |
| TCGA-D1-A1NS-01A | 53.8027 Stage IA G1         |
| TCGA-D1-A176-01A | 67.1808 Stage IB G2         |
| TCGA-5S-A9Q8-01A | 51.4658 Stage IIIAG2        |

|                  |         |            |            |
|------------------|---------|------------|------------|
| TCGA-EY-A2OP-01A | 63.2603 | Stage IA   | G3         |
| TCGA-EC-A24G-01A | 57.1425 | Stage II   | G3         |
| TCGA-B5-A11Z-01A | 61.6575 | Stage IA   | G1         |
| TCGA-B5-A1MY-01A | 62.4795 | Stage IIIC | G3         |
| TCGA-EO-A3KU-01A | 68.811  | Stage II   | G3         |
| TCGA-EY-A2OQ-01A | 61.1205 | Stage IA   | G3         |
| TCGA-D1-A16R-01A | 39.6301 | Stage IA   | G1         |
| TCGA-D1-A162-01A | 69.9808 | Stage IB   | G1         |
| TCGA-BG-A3EW-01A | 62.2055 | Stage III  | G3         |
| TCGA-DF-A2KR-01A | 84.9507 | Stage IIIC | G3         |
| TCGA-QF-A5YS-01A | 57.0986 | Stage II   | G2         |
| TCGA-BK-A139-01A | 74.1836 | Stage IB   | G3         |
| TCGA-BS-A0UA-01A | 68.1425 | Stage IB   | G1         |
| TCGA-AJ-A3BI-01A | 67.4603 | Stage IA   | G3         |
| TCGA-D1-A16E-01A | 73.5863 | Stage IB   | G1         |
| TCGA-EY-A1GX-01A | 76.6082 | Stage IIIA | G2         |
| TCGA-SJ-A6ZI-01A | 64.8027 | Stage IB   | G1         |
| TCGA-EY-A3QX-01A | 64.8301 | Stage IVB  | G3         |
| TCGA-EY-A5W2-01A | 72.5973 | Stage IB   | G3         |
| TCGA-EO-A3KW-01A | 72.5808 | Stage IA   | G3         |
| TCGA-EY-A1GC-01A | 62.0712 | Stage IB   | G3         |
| TCGA-AP-A1DP-01A | 70.1397 | Stage IA   | G2         |
| TCGA-BG-A2L7-01A | 68.7425 | Stage IA   | G3         |
| TCGA-AP-A0LF-01A | 82.2658 | Stage IVB  | G3         |
| TCGA-D1-A17S-01A | 59.7096 | Stage IA   | G1         |
| TCGA-D1-A16O-01A | 44.1479 | Stage IB   | G1         |
| TCGA-BS-A0T9-01A | 39.0493 | Stage IVB  | G3         |
| TCGA-EO-A1Y7-01A | 65.9863 | Stage IB   | G3         |
| TCGA-D1-A15X-01A | 45.2932 | Stage IA   | High Grade |
| TCGA-AJ-A3NH-01A | 90.0575 | Stage IB   | G3         |
| TCGA-AJ-A3OK-01A | 73.5644 | Stage IA   | G3         |
| TCGA-EY-A1GI-01A | 52.3753 | Stage IB   | G2         |
| TCGA-D1-A101-01A | 60.4877 | Stage IB   | G2         |
| TCGA-A5-A0GQ-01A | 76.926  | Stage IB   | G1         |
| TCGA-FI-A2EW-01A | 71.9644 | Stage IIB  | G3         |
| TCGA-B5-A5OC-01A | 71.5315 | Stage IIIB | G3         |
| TCGA-AX-A1CJ-01A | 59.3288 | Stage IC   | G2         |
| TCGA-D1-A16V-01A | 78.4521 | Stage IIIC | G3         |
| TCGA-DF-A2KN-01A | NA      | Stage IC   | G3         |
| TCGA-EY-A215-01A | 60.4822 | Stage IB   | G3         |
| TCGA-AX-A2H5-01A | 67.8274 | Stage IIIC | G3         |
| TCGA-AX-A1CA-01A | 70.7315 | Stage IB   | G3         |
| TCGA-D1-A0ZO-01A | 75.2932 | Stage IB   | G1         |
| TCGA-FI-A2D4-01A | 44.2822 | Stage IIIC | G3         |
| TCGA-FI-A2D5-01A | 56.6192 | Stage IVB  | G3         |

|                  |                    |              |
|------------------|--------------------|--------------|
| TCGA-AX-A1CC-01A | 65.1918 Stage IC   | G3           |
| TCGA-EO-A3AV-01A | 51.2685 Stage IIIC | G3           |
| TCGA-AX-A1C8-01A | 77.9507 Stage IIIC | G3           |
| TCGA-A5-A1OH-01A | 86.1671 Stage IIIC | G3           |
| TCGA-D1-A16N-01A | 51.4712 Stage IIIC | G3           |
| TCGA-B5-A11R-01A | 51.7205 Stage II   | G3           |
| TCGA-D1-A17F-01A | 68.811 Stage IA    | G2           |
| TCGA-BS-A0WQ-01A | 55.1534 Stage IA   | G2           |
| TCGA-B5-A1MW-01A | 55.2959 Stage IA   | G3           |
| TCGA-H5-A2HR-01A | 71.1945 Stage IB   | G3           |
| TCGA-D1-A0ZV-01A | 58.5589 Stage IB   | G2           |
| TCGA-AP-A1E0-01A | 40.1452 Stage IIIC | G2           |
| TCGA-BG-A0VV-01A | 53.6466 Stage IA   | G1           |
| TCGA-FI-A2EU-01A | 68.0466 Stage IA   | G3           |
| TCGA-PG-A917-01A | 74.2575 Stage IA   | G2           |
| TCGA-EY-A54A-01A | 68.0055 Stage IIIC | G3           |
| TCGA-BS-A0V8-01A | 68.4411 Stage IIB  | G2           |
| TCGA-AX-A1CK-01A | 58.0822 Stage IB   | G2           |
| TCGA-AP-A1E3-01A | 45.326 Stage IIIC  | G3           |
| TCGA-D1-A1NU-01A | 74.7178 Stage IA   | G3           |
| TCGA-D1-A169-01A | 63.6658 Stage IV   | G2           |
| TCGA-BG-A2AD-01A | 63.189 Stage IIIB  | G3           |
| TCGA-BG-A0VX-01A | 58.6986 Stage IB   | G1           |
| TCGA-BG-A18A-01A | 74.2082 Stage IA   | G1           |
| TCGA-EY-A210-01A | 82.4521 Stage IIIC | G3           |
| TCGA-AX-A2HC-01A | 53.3836 Stage IIIC | G3           |
| TCGA-AX-A1CR-01A | 70.7178 Stage IIB  | G3           |
| TCGA-D1-A17B-01A | 69.874 Stage IB    | G2           |
| TCGA-AJ-A3BG-01A | 65.3726 Stage IA   | G3           |
| TCGA-AX-A2H4-01A | 66.3945 Stage IIIC | G3           |
| TCGA-DI-A1NO-01A | 68.4822 Stage IIIC | G3           |
| TCGA-AJ-A3BK-01A | 68.337 Stage IC    | G3           |
| TCGA-AJ-A2QM-01A | 67.8795 Stage II   | G3           |
| TCGA-D1-A17Q-01A | 54.8356 Stage IA   | G2           |
| TCGA-2E-A9G8-01A | NA                 | Stage III G2 |
| TCGA-AX-A2H8-01A | 64.2411 Stage IB   | G3           |
| TCGA-B5-A3S1-01A | 71.3178 Stage IIIC | G3           |
| TCGA-D1-A0ZZ-01A | 80.6027 Stage IB   | G3           |
| TCGA-AX-A3GI-01A | 66.8164 Stage IIIC | G3           |
| TCGA-BK-A13C-01A | 47.4438 Stage IB   | G2           |
| TCGA-AX-A2HH-01A | 60.0658 Stage IA   | G3           |
| TCGA-FI-A2D6-01A | 74.137 Stage IB    | G3           |
| TCGA-AX-A2HG-01A | 56.9068 Stage IC   | G3           |
| TCGA-EO-A3AZ-01A | 80.0932 Stage IB   | G3           |
| TCGA-D1-A1NW-01A | 72.7562 Stage IVB  | G3           |

|                  |         |          |    |
|------------------|---------|----------|----|
| TCGA-BG-A18C-01A | 72.8822 | Stage IA | G2 |
| TCGA-BS-A0U5-01A | 76.5616 | Stage IA | G1 |
| TCGA-EY-A1GL-01A | 51.4    | Stage II | G2 |
| TCGA-PG-A7D5-01A | 63.0301 | Stage IA | G3 |
