# Supplementary material for: Comprehensive Analysis of GDF10 Methylation Site-Associated Genes as Prognostic Markers for Endometrial Cancer
Source: Hindawi journal article supplement (doi:10.1155/2022/7117083), 2022-10-10
Supplement: f1 [file 7117083.f1.zip]

SPDEF  
TMPRSS13  
TMEM63A  
B4GALNT3  
GREB1  
NCMAP  
MUC5B  
HID1  
PGR  
MAP2K6  
PPAP2C  
AQP5  
STXBP6  
TRPM4  
HGD  
CLDN6  
GLYATL2  
PIGR  
TMC5  
LRRC26  
MAL  
SRD5A3  
ST6GALNAC1  
KIAA1324  
ENTPD3  
PIK3R3  
STX19  
FOXA2  
FAM174B  
VIM  
CREB3L4  
GCNT1  
GCNT2  
CYB561  
RNF183  
SERINC2  
ZNF516  
SCGB2A2  
CYP4X1  
TNNT1  
TFF3  
FOLH1  
DNAJC22  
B4GALT1
