# Supplementary material for: Comprehensive Analysis of GDF10 Methylation Site-Associated Genes as Prognostic Markers for Endometrial Cancer
Source: Hindawi journal article supplement (doi:10.1155/2022/7117083), 2022-10-10
Supplement: f1 [file 7117083.f1.zip]

| probes   | module     | Ccp.GS.cg0297 | p.GS.cg04110 | p.GS.cg07773 | p.GS.cg14720 | p.GS.cg20186 |
|----------|------------|---------------|--------------|--------------|--------------|--------------|
| AACS     | saddlebro' | 1.20E-08      | 3.17E-09     | 5.45E-11     | 6.39E-12     | 9.19E-10     |
| AC11449  | saddlebro' | 1.67E-09      | 1.48E-10     | 1.47E-09     | 6.52E-10     | 2.15E-10     |
| ACAA2    | saddlebro' | 0.00013385    | 5.68E-05     | 5.49E-07     | 3.39E-05     | 5.36E-05     |
| ACSL5    | saddlebro' | 0.00047823    | 0.000852152  | 0.003396996  | 0.000164423  | 0.000188923  |
| ADAM28   | saddlebro' | 1.65E-11      | 1.70E-09     | 3.54E-08     | 1.00E-10     | 1.32E-11     |
| ANO1     | saddlebro' | 2.65E-06      | 4.80E-06     | 2.31E-05     | 5.60E-07     | 2.98E-06     |
| AQP5     | saddlebro' | 2.52E-07      | 2.59E-08     | 2.67E-06     | 1.00E-05     | 1.46E-07     |
| ARF1     | saddlebro' | 5.06E-13      | 2.02E-14     | 3.33E-14     | 1.38E-13     | 3.28E-13     |
| ARFIP2   | saddlebro' | 4.98E-19      | 1.13E-19     | 3.78E-14     | 2.12E-17     | 2.96E-19     |
| ARSD     | saddlebro' | 1.46E-19      | 3.30E-19     | 1.41E-14     | 6.24E-16     | 1.66E-18     |
| ATP2C2   | saddlebro' | 1.14E-22      | 3.58E-22     | 4.36E-21     | 5.95E-23     | 2.48E-24     |
| B4GALN   | saddlebro' | 2.05E-15      | 4.79E-16     | 1.03E-14     | 1.21E-15     | 4.60E-16     |
| B4GALT   | saddlebro' | 3.49E-13      | 2.18E-13     | 3.62E-14     | 1.21E-14     | 5.63E-14     |
| BACE2    | saddlebro' | 0.00727027    | 0.005334748  | 0.029598518  | 0.007689129  | 0.005224749  |
| BCAS4    | saddlebro' | 1.04E-09      | 1.30E-08     | 1.98E-06     | 1.61E-08     | 3.96E-10     |
| C1orf64  | saddlebro' | 3.00E-07      | 8.07E-09     | 2.63E-06     | 5.83E-07     | 7.58E-08     |
| C4BPA    | saddlebro' | 1.35E-08      | 1.27E-08     | 1.57E-07     | 2.66E-11     | 1.16E-08     |
| C5AR2    | saddlebro' | 1.35E-06      | 4.25E-07     | 1.23E-06     | 1.71E-06     | 3.69E-07     |
| C9orf152 | saddlebro' | 1.39E-23      | 1.84E-24     | 4.25E-20     | 2.48E-25     | 7.14E-25     |
| CA8      | saddlebro' | 8.57E-11      | 9.65E-09     | 6.45E-06     | 4.63E-09     | 2.15E-10     |
| CAPN6    | saddlebro' | 3.42E-08      | 2.45E-09     | 2.08E-05     | 6.87E-08     | 4.96E-08     |
| CCDC125  | saddlebro' | 0.00817695    | 0.025939194  | 0.146400424  | 0.009890312  | 0.00256002   |
| CEACAM   | saddlebro' | 1.14E-16      | 1.95E-16     | 3.15E-17     | 8.22E-18     | 3.09E-18     |
| CES3     | saddlebro' | 1.47E-18      | 2.27E-17     | 7.04E-14     | 7.85E-18     | 7.64E-19     |
| CHDH     | saddlebro' | 4.00E-14      | 8.53E-13     | 4.29E-15     | 2.94E-16     | 3.87E-14     |
| CISH     | saddlebro' | 9.58E-12      | 9.15E-12     | 7.51E-13     | 1.88E-13     | 3.14E-12     |
| CLDN6    | saddlebro' | 3.63E-14      | 5.23E-15     | 8.03E-15     | 4.17E-16     | 4.83E-16     |
| CPVL     | saddlebro' | 2.61E-26      | 4.07E-26     | 1.88E-20     | 5.68E-23     | 9.48E-28     |
| CREB3L1  | saddlebro' | 3.60E-12      | 8.69E-13     | 8.14E-09     | 1.14E-11     | 3.28E-13     |
| CREB3L4  | saddlebro' | 1.10E-19      | 5.15E-20     | 2.91E-16     | 6.01E-19     | 3.25E-18     |
| CRYL1    | saddlebro' | 5.13E-14      | 1.46E-14     | 1.73E-12     | 1.51E-14     | 3.34E-15     |
| CTNNB1   | saddlebro' | 1.83E-17      | 5.60E-17     | 1.21E-18     | 3.44E-16     | 1.61E-18     |
| CYB561   | saddlebro' | 2.00E-12      | 2.14E-13     | 4.02E-13     | 2.14E-12     | 2.77E-12     |
| CYB5R1   | saddlebro' | 1.35E-06      | 2.47E-06     | 6.81E-05     | 9.70E-06     | 1.63E-06     |
| CYP2J2   | saddlebro' | 0.0010991     | 0.001722326  | 0.000488614  | 0.000315861  | 0.000933692  |
| CYP4X1   | saddlebro' | 1.57E-09      | 2.16E-08     | 7.00E-07     | 3.44E-08     | 2.26E-09     |
| DACT2    | saddlebro' | 0.00040858    | 0.002310851  | 0.045289983  | 0.00825904   | 0.002185472  |
| DEPTOR   | saddlebro' | 6.17E-08      | 5.85E-08     | 7.09E-09     | 3.46E-09     | 8.18E-08     |
| DNAJC2   | saddlebro' | 8.20E-11      | 1.55E-11     | 3.91E-09     | 1.66E-11     | 2.47E-10     |
| DOCK5    | saddlebro' | 9.99E-08      | 2.84E-07     | 4.24E-06     | 6.23E-09     | 3.74E-08     |
| ENTPD3   | saddlebro' | 3.80E-13      | 4.50E-12     | 6.02E-08     | 4.34E-10     | 1.45E-13     |
| EPHB2    | saddlebro' | 2.57E-16      | 1.56E-16     | 7.64E-13     | 6.79E-17     | 9.11E-18     |
| EPHX1    | saddlebro' | 1.48E-18      | 6.73E-19     | 8.13E-17     | 2.06E-20     | 5.84E-19     |
| ERGIC1   | saddlebro' | 6.47E-15      | 5.06E-16     | 3.52E-15     | 1.20E-16     | 1.54E-15     |

|          |            |            |             |             |             |             |
|----------|------------|------------|-------------|-------------|-------------|-------------|
| ERMN     | saddlebro' | 1.30E-11   | 3.48E-10    | 7.04E-09    | 2.16E-10    | 7.84E-12    |
| ESR1     | saddlebro' | 1.84E-07   | 1.05E-07    | 5.58E-05    | 1.31E-07    | 7.91E-08    |
| FAM174F  | saddlebro' | 3.28E-08   | 1.86E-08    | 8.52E-06    | 1.35E-06    | 8.40E-09    |
| FAM189F  | saddlebro' | 0.00069879 | 0.001950755 | 0.028063929 | 0.023238273 | 0.001177517 |
| FAM46C   | saddlebro' | 7.09E-14   | 1.05E-14    | 9.65E-12    | 2.52E-13    | 3.08E-16    |
| FBLN1    | saddlebro' | 0.03263034 | 0.031434013 | 0.309803044 | 0.093835951 | 0.020330734 |
| FCHO1    | saddlebro' | 4.47E-09   | 4.52E-08    | 0.000102654 | 5.62E-06    | 1.05E-09    |
| FOLH1    | saddlebro' | 7.09E-07   | 3.96E-07    | 0.000230197 | 5.65E-06    | 5.56E-07    |
| FOXA2    | saddlebro' | 4.15E-20   | 2.42E-19    | 6.18E-19    | 1.13E-19    | 2.18E-21    |
| GALNT1   | saddlebro' | 1.44E-24   | 3.15E-25    | 1.75E-19    | 4.95E-23    | 2.60E-27    |
| GALNT1L  | saddlebro' | 1.86E-09   | 2.69E-10    | 1.82E-08    | 1.81E-10    | 2.78E-08    |
| GCNT1    | saddlebro' | 6.24E-10   | 1.03E-08    | 1.54E-06    | 6.96E-08    | 5.91E-10    |
| GCNT2    | saddlebro' | 5.31E-12   | 1.25E-12    | 3.56E-10    | 1.19E-11    | 3.31E-12    |
| GCNT3    | saddlebro' | 2.01E-08   | 2.20E-10    | 5.78E-10    | 3.14E-12    | 1.49E-09    |
| GDF5     | saddlebro' | 0.00245687 | 0.001660165 | 0.020090303 | 0.005065583 | 0.002248345 |
| GLIS2    | saddlebro' | 3.90E-21   | 1.78E-19    | 1.48E-17    | 9.81E-20    | 4.00E-22    |
| GLYATL   | saddlebro' | 1.63E-18   | 1.79E-18    | 1.41E-17    | 3.33E-17    | 7.71E-20    |
| GNB5     | saddlebro' | 0.00078817 | 0.001445746 | 0.031706866 | 0.005064505 | 0.000639156 |
| GREB1    | saddlebro' | 0.00333977 | 0.027395452 | 0.209237526 | 0.0289628   | 0.007526102 |
| GRIN1    | saddlebro' | 3.28E-19   | 2.15E-19    | 4.27E-19    | 7.63E-18    | 1.44E-19    |
| HADH     | saddlebro' | 2.93E-12   | 1.09E-12    | 1.01E-11    | 5.58E-13    | 3.69E-13    |
| HGD      | saddlebro' | 9.70E-17   | 1.13E-17    | 6.83E-14    | 6.77E-18    | 2.40E-17    |
| HID1     | saddlebro' | 1.24E-07   | 1.98E-07    | 3.81E-07    | 1.09E-06    | 2.46E-08    |
| HIF3A    | saddlebro' | 4.65E-29   | 2.53E-30    | 9.16E-30    | 1.03E-30    | 1.28E-32    |
| HMGA2    | saddlebro' | 3.08E-05   | 1.32E-05    | 3.12E-07    | 5.33E-07    | 3.99E-06    |
| HOXA4    | saddlebro' | 5.28E-09   | 1.23E-09    | 1.06E-08    | 2.24E-09    | 6.34E-10    |
| HPX      | saddlebro' | 3.13E-05   | 1.69E-05    | 1.33E-05    | 1.58E-05    | 5.57E-05    |
| IGF2BP2  | saddlebro' | 1.29E-15   | 4.85E-16    | 6.20E-16    | 2.40E-16    | 1.06E-16    |
| IHH      | saddlebro' | 1.61E-09   | 2.36E-08    | 7.62E-06    | 1.40E-07    | 1.64E-09    |
| IL20RA   | saddlebro' | 1.51E-13   | 8.42E-14    | 1.67E-09    | 3.01E-12    | 2.31E-14    |
| IQCJ-SCF | saddlebro' | 2.62E-12   | 2.86E-13    | 8.14E-12    | 7.24E-12    | 1.57E-12    |
| ITM2C    | saddlebro' | 1.63E-11   | 8.52E-13    | 2.17E-14    | 2.85E-14    | 9.81E-14    |
| KDM4B    | saddlebro' | 3.12E-30   | 4.08E-29    | 8.26E-21    | 5.61E-27    | 5.60E-32    |
| KIAA132  | saddlebro' | 3.19E-20   | 3.13E-21    | 2.64E-17    | 1.25E-20    | 2.00E-21    |
| L1CAM    | saddlebro' | 2.77E-18   | 2.47E-19    | 8.10E-17    | 3.80E-19    | 2.02E-20    |
| LRP5L    | saddlebro' | 2.89E-06   | 1.04E-05    | 0.000190056 | 8.05E-06    | 5.39E-06    |
| LRRC26   | saddlebro' | 5.49E-20   | 1.20E-20    | 1.84E-19    | 4.76E-19    | 6.12E-21    |
| LRRC3    | saddlebro' | 1.02E-09   | 3.14E-11    | 9.46E-08    | 6.99E-10    | 1.52E-11    |
| MAL      | saddlebro' | 0.00010431 | 0.000269861 | 0.001141542 | 0.00033423  | 4.15E-05    |
| MANSC1   | saddlebro' | 7.32E-17   | 4.11E-16    | 4.23E-12    | 1.97E-15    | 2.75E-17    |
| MAP2K6   | saddlebro' | 2.10E-11   | 1.46E-11    | 2.56E-06    | 4.16E-09    | 1.52E-11    |
| MCF2L    | saddlebro' | 3.50E-11   | 4.28E-10    | 3.66E-07    | 5.08E-09    | 2.50E-11    |
| MLPH     | saddlebro' | 1.85E-14   | 7.61E-16    | 1.30E-16    | 1.09E-16    | 7.92E-16    |
| MMP26    | saddlebro' | 0.00738811 | 0.080893071 | 0.176442965 | 0.103967914 | 0.023482272 |
| MUC5AC   | saddlebro' | 0.00251807 | 5.41E-05    | 0.001889998 | 0.00111948  | 0.002169339 |

|         |            |            |             |             |             |             |
|---------|------------|------------|-------------|-------------|-------------|-------------|
| MUC5B   | saddlebro' | 2.82E-13   | 2.07E-14    | 2.33E-13    | 3.54E-16    | 3.06E-13    |
| NAAA    | saddlebro' | 4.42E-05   | 2.51E-05    | 0.000197582 | 2.15E-05    | 1.23E-05    |
| NCMAP   | saddlebro' | 5.59E-09   | 9.88E-09    | 1.07E-08    | 1.70E-09    | 6.58E-09    |
| PGR     | saddlebro' | 1.91E-05   | 0.000269747 | 0.010795956 | 0.000110497 | 2.17E-05    |
| PIGR    | saddlebro' | 1.37E-13   | 2.98E-15    | 1.38E-14    | 1.61E-17    | 1.52E-14    |
| PIK3R3  | saddlebro' | 1.17E-22   | 1.94E-24    | 7.17E-19    | 1.47E-21    | 1.64E-24    |
| PLLP    | saddlebro' | 5.11E-06   | 1.02E-06    | 5.71E-05    | 6.37E-05    | 3.64E-06    |
| POC1B-G | saddlebro' | 1.74E-09   | 5.48E-09    | 8.79E-07    | 4.95E-09    | 3.78E-10    |
| PORCN   | saddlebro' | 0.00163427 | 0.003966484 | 0.002815702 | 0.002469534 | 0.001070004 |
| PPAP2C  | saddlebro' | 5.29E-22   | 1.04E-23    | 1.37E-21    | 1.27E-22    | 3.35E-23    |
| RBBP7   | saddlebro' | 3.08E-11   | 8.50E-11    | 9.26E-13    | 3.41E-11    | 4.61E-12    |
| RNF183  | saddlebro' | 7.93E-11   | 1.16E-11    | 6.67E-10    | 3.18E-10    | 3.00E-11    |
| RSPO4   | saddlebro' | 2.01E-22   | 7.41E-24    | 6.52E-21    | 6.98E-23    | 1.49E-25    |
| SCGB2A  | saddlebro' | 2.46E-14   | 4.47E-15    | 5.34E-11    | 9.00E-12    | 7.25E-15    |
| SELENBI | saddlebro' | 2.07E-05   | 1.91E-05    | 9.47E-05    | 6.08E-06    | 2.21E-05    |
| SERINC2 | saddlebro' | 4.92E-14   | 5.28E-16    | 1.15E-14    | 3.17E-13    | 1.64E-14    |
| SH2D4A  | saddlebro' | 7.05E-15   | 4.65E-14    | 2.31E-13    | 1.42E-16    | 6.25E-15    |
| SLC25A3 | saddlebro' | 2.27E-10   | 1.16E-09    | 4.19E-07    | 2.11E-08    | 1.24E-10    |
| SLC43A1 | saddlebro' | 7.68E-09   | 6.64E-08    | 8.51E-06    | 7.04E-08    | 2.53E-08    |
| SLC44A3 | saddlebro' | 1.55E-06   | 8.72E-06    | 0.000124974 | 8.65E-06    | 1.27E-06    |
| SLC47A1 | saddlebro' | 1.96E-11   | 2.02E-09    | 4.48E-08    | 1.77E-09    | 2.80E-11    |
| SLC5A1  | saddlebro' | 1.43E-14   | 9.37E-14    | 1.05E-11    | 3.66E-13    | 1.22E-15    |
| SLC6A12 | saddlebro' | 4.80E-16   | 1.07E-15    | 2.03E-15    | 3.85E-15    | 1.10E-17    |
| SLCO3A1 | saddlebro' | 3.54E-18   | 1.15E-17    | 1.53E-13    | 1.74E-14    | 1.17E-18    |
| SPDEF   | saddlebro' | 1.20E-24   | 6.85E-27    | 2.92E-23    | 1.70E-25    | 2.37E-26    |
| SPINK4  | saddlebro' | 1.86E-07   | 4.47E-08    | 1.26E-08    | 2.76E-07    | 5.39E-08    |
| SRD5A3  | saddlebro' | 4.07E-17   | 3.43E-18    | 1.02E-14    | 1.52E-16    | 7.47E-19    |
| ST6GAL1 | saddlebro' | 6.80E-06   | 9.13E-08    | 4.47E-06    | 2.99E-07    | 1.08E-06    |
| STEAP1  | saddlebro' | 1.00E-11   | 1.08E-10    | 3.62E-12    | 5.29E-13    | 9.07E-13    |
| STX19   | saddlebro' | 5.69E-08   | 3.85E-08    | 4.46E-06    | 1.40E-06    | 2.17E-08    |
| STXBP6  | saddlebro' | 5.72E-10   | 2.42E-10    | 5.43E-05    | 6.24E-08    | 7.52E-10    |
| TBC1D3C | saddlebro' | 2.73E-13   | 2.17E-12    | 7.60E-11    | 2.05E-15    | 2.05E-14    |
| TFF3    | saddlebro' | 1.33E-22   | 2.27E-25    | 4.13E-21    | 4.84E-23    | 4.72E-24    |
| TMC5    | saddlebro' | 5.47E-11   | 6.13E-12    | 7.70E-12    | 7.95E-15    | 3.42E-12    |
| TMEM21  | saddlebro' | 7.15E-18   | 1.31E-16    | 8.19E-17    | 3.10E-17    | 5.98E-18    |
| TMEM21  | saddlebro' | 5.64E-11   | 1.51E-11    | 1.37E-09    | 6.76E-12    | 1.86E-11    |
| TMEM62  | saddlebro' | 2.23E-22   | 1.00E-23    | 3.30E-21    | 4.58E-25    | 1.54E-23    |
| TMEM63  | saddlebro' | 1.51E-11   | 8.02E-12    | 2.74E-10    | 7.45E-12    | 5.05E-12    |
| TMPRSS  | saddlebro' | 2.78E-09   | 3.27E-08    | 4.27E-08    | 1.55E-08    | 8.89E-11    |
| TNNT1   | saddlebro' | 9.52E-09   | 2.10E-08    | 1.94E-06    | 2.66E-07    | 1.43E-09    |
| TRIM3   | saddlebro' | 1.79E-11   | 4.02E-12    | 5.73E-10    | 1.66E-12    | 5.34E-12    |
| TRPM4   | saddlebro' | 5.15E-20   | 3.67E-21    | 1.50E-18    | 1.78E-19    | 4.63E-21    |
| TSKU    | saddlebro' | 2.28E-10   | 3.60E-11    | 1.44E-08    | 1.23E-11    | 1.60E-11    |
| TSPAN8  | saddlebro' | 3.26E-07   | 2.76E-07    | 7.35E-06    | 4.63E-07    | 4.78E-07    |
| TUBA3D  | saddlebro' | 0.78841172 | 0.862347395 | 0.472416707 | 0.632739907 | 0.970578046 |

|        |           |            |             |             |             |             |
|--------|-----------|------------|-------------|-------------|-------------|-------------|
| TUBB4A | saddlebro | 8.54E-10   | 1.08E-10    | 6.11E-12    | 2.99E-12    | 1.74E-11    |
| VIM    | saddlebro | 0.00318946 | 0.001281465 | 0.116437433 | 0.039486128 | 0.001867284 |
| VMAC   | saddlebro | 1.38E-21   | 5.27E-23    | 2.47E-19    | 2.92E-22    | 4.68E-22    |
| ZG16B  | saddlebro | 4.91E-10   | 2.12E-10    | 4.10E-10    | 6.02E-11    | 9.98E-11    |
| ZNF516 | saddlebro | 0.34848677 | 0.645478837 | 0.460479263 | 0.920830812 | 0.414197364 |

| p.GS.cg24636 | p.MMskyblue | p.MMskyblue | p.MMpaleturq | p.MMpurple  | p.MMsteelblu |
|--------------|-------------|-------------|--------------|-------------|--------------|
| 9.72E-11     | 0.001119714 | 2.42E-07    | 1.23E-10     | 0.249131844 | 2.67E-05     |
| 3.21E-11     | 5.53E-14    | 0.686684291 | 0.040644089  | 0.002763564 | 0.433933613  |
| 1.80E-05     | 0.709206926 | 0.731532269 | 0.000890067  | 0.239777489 | 0.277636309  |
| 8.02E-05     | 0.013351055 | 7.30E-07    | 0.124211611  | 0.095231561 | 0.017791163  |
| 1.20E-11     | 0.202511093 | 7.01E-07    | 0.066532626  | 0.001015391 | 0.00129236   |
| 4.96E-07     | 0.119684063 | 5.73E-07    | 0.098136524  | 6.54E-06    | 0.00088364   |
| 8.56E-08     | 0.35812775  | 4.76E-06    | 6.27E-11     | 2.74E-08    | 2.24E-10     |
| 9.45E-14     | 1.51E-05    | 2.80E-09    | 3.15E-17     | 0.021240512 | 5.46E-09     |
| 7.48E-20     | 0.000100766 | 9.26E-05    | 2.48E-31     | 6.36E-12    | 8.62E-14     |
| 3.70E-19     | 0.692219273 | 0.185933123 | 3.67E-08     | 0.968980725 | 0.855722311  |
| 1.72E-24     | 0.858049865 | 0.039300505 | 1.50E-21     | 1.77E-05    | 2.46E-06     |
| 2.90E-16     | 0.560582521 | 0.000632966 | 1.10E-22     | 1.54E-08    | 1.62E-09     |
| 8.07E-16     | 0.169325915 | 0.525397921 | 0.002778913  | 0.608784504 | 0.196680539  |
| 0.004333209  | 0.281639433 | 0.014423279 | 0.354154122  | 0.061691997 | 0.072889654  |
| 2.42E-10     | 0.894296838 | 2.09E-06    | 0.234711798  | 0.003772408 | 0.002944841  |
| 1.05E-08     | 0.212831064 | 0.114029694 | 7.45E-06     | 0.282479897 | 0.270833754  |
| 5.35E-09     | 0.119838871 | 5.31E-06    | 0.080372551  | 0.029085462 | 0.011044107  |
| 5.26E-08     | 0.191177157 | 0.009733944 | 6.98E-06     | 0.642956821 | 0.636809039  |
| 7.76E-26     | 0.355421339 | 0.001387679 | 8.73E-10     | 0.848518102 | 0.944172307  |
| 5.31E-10     | 0.532086219 | 0.025602174 | 0.512920286  | 0.09950434  | 0.006734838  |
| 2.55E-08     | 0.234748649 | 2.75E-05    | 0.019700763  | 0.019412134 | 0.1486459    |
| 0.001939253  | 0.448328653 | 0.091527552 | 0.641288906  | 0.062148648 | 0.047555255  |
| 4.23E-18     | 9.21E-06    | 0.000640621 | 0.002130906  | 0.239440053 | 0.295837447  |
| 2.14E-19     | 0.003402582 | 0.409033361 | 2.03E-07     | 0.000125696 | 0.000279228  |
| 4.65E-15     | 0.338066598 | 0.050949815 | 9.44E-09     | 0.550063226 | 0.052091033  |
| 1.26E-13     | 0.099427764 | 0.64465532  | 6.52E-06     | 0.971450971 | 0.126884238  |
| 5.46E-16     | 0.412655379 | 1.37E-05    | 9.59E-11     | 0.830019027 | 0.386208199  |
| 7.41E-27     | 0.747470059 | 0.909371964 | 1.95E-12     | 0.064243175 | 0.001990605  |
| 1.72E-13     | 0.10728125  | 6.82E-07    | 7.33E-06     | 0.329270421 | 0.357289772  |
| 1.69E-19     | 0.024531511 | 0.031529919 | 2.95E-11     | 1.62E-06    | 1.07E-05     |
| 3.78E-16     | 0.587306057 | 0.003028294 | 1.34E-11     | 0.181238067 | 0.803711127  |
| 1.07E-17     | 0.580299036 | 2.73E-06    | 4.75E-24     | 7.91E-08    | 4.75E-11     |
| 6.28E-13     | 0.647943845 | 2.91E-05    | 6.06E-18     | 1.54E-08    | 3.59E-09     |
| 7.72E-07     | 0.123663289 | 0.174050958 | 2.58E-05     | 0.936769566 | 0.863638536  |
| 0.000774664  | 0.044047009 | 0.423206154 | 0.093137896  | 0.052039598 | 0.23663723   |
| 2.38E-09     | 8.95E-06    | 0.18187838  | 0.637901607  | 0.049364634 | 0.135643426  |
| 0.002098234  | 0.022643211 | 0.422828037 | 0.000109339  | 0.363173004 | 0.013143266  |
| 7.67E-09     | 0.28707146  | 0.206290439 | 0.019121446  | 0.506486701 | 0.265363608  |
| 7.02E-11     | 0.345096487 | 0.821325513 | 0.000493854  | 0.1129439   | 0.294436517  |
| 1.91E-08     | 0.223445873 | 1.58E-09    | 0.112579266  | 0.000760914 | 0.001382394  |
| 4.67E-13     | 0.238627948 | 0.018318484 | 0.000808578  | 0.29257715  | 0.227153529  |
| 9.12E-18     | 3.23E-05    | 2.22E-12    | 2.70E-07     | 0.891130268 | 0.041770856  |
| 7.54E-20     | 0.646138673 | 0.060212738 | 1.38E-13     | 1.92E-05    | 0.000181184  |
| 5.43E-16     | 2.14E-05    | 0.304599025 | 2.82E-05     | 0.066452528 | 0.49191315   |

|             |             |             |             |             |             |
|-------------|-------------|-------------|-------------|-------------|-------------|
| 2.87E-12    | 0.949309865 | 0.479791715 | 0.000271383 | 0.234134849 | 0.378911747 |
| 2.57E-08    | 0.792055048 | 1.65E-09    | 0.9549871   | 0.000104643 | 9.61E-06    |
| 2.65E-09    | 0.065828276 | 0.023158324 | 1.79E-13    | 5.11E-08    | 9.34E-08    |
| 0.001275835 | 0.239466399 | 1.64E-07    | 0.080935915 | 0.00045251  | 0.000330824 |
| 7.71E-16    | 0.012662061 | 0.00011825  | 0.000148784 | 0.024731737 | 0.026815159 |
| 0.010057836 | 0.038152591 | 0.47201444  | 3.48E-07    | 0.519852287 | 0.016594728 |
| 1.44E-09    | 0.224909895 | 7.00E-16    | 0.080657396 | 5.46E-05    | 1.36E-06    |
| 1.12E-07    | 0.049034056 | 0.066623629 | 0.004799638 | 0.032464994 | 0.38664317  |
| 1.30E-21    | 0.017291956 | 0.607745671 | 1.51E-15    | 0.000420647 | 0.000292355 |
| 2.37E-26    | 0.711695799 | 0.061764647 | 1.98E-11    | 0.706970888 | 0.394414278 |
| 2.79E-08    | 0.277108606 | 0.498113087 | 0.001861002 | 0.069000707 | 0.267486363 |
| 2.35E-10    | 0.28975146  | 0.000962812 | 0.161212581 | 0.069207593 | 0.098844009 |
| 4.18E-13    | 0.033997783 | 0.759640806 | 0.008251392 | 0.022855831 | 0.218784833 |
| 2.76E-10    | 0.000149251 | 0.003153249 | 0.000500296 | 0.262771899 | 0.333316819 |
| 0.001188792 | 0.097841353 | 0.010316155 | 2.30E-05    | 4.90E-06    | 1.55E-05    |
| 5.65E-22    | 0.000710102 | 0.322040306 | 7.18E-11    | 7.44E-08    | 0.005336863 |
| 7.75E-20    | 0.320081951 | 0.177387122 | 1.95E-06    | 0.056064723 | 0.155408807 |
| 0.000576445 | 0.741042049 | 1.22E-07    | 0.007102864 | 2.02E-05    | 0.00032234  |
| 0.007442375 | 0.863789106 | 3.76E-10    | 0.270080007 | 3.19E-15    | 4.45E-12    |
| 3.25E-19    | 0.759167491 | 0.002975031 | 1.58E-15    | 9.73E-05    | 5.81E-06    |
| 1.52E-13    | 0.000209209 | 0.366711397 | 1.01E-09    | 0.171809812 | 0.188522474 |
| 2.54E-19    | 0.013512499 | 0.56289789  | 1.06E-10    | 0.013126291 | 0.020166445 |
| 4.07E-08    | 0.143240039 | 2.84E-09    | 4.37E-14    | 3.89E-07    | 3.58E-11    |
| 3.42E-33    | 0.104826494 | 0.269379357 | 2.06E-19    | 0.000596557 | 0.00230126  |
| 1.93E-06    | 0.251719709 | 0.383722847 | 5.73E-10    | 0.121505278 | 0.090608457 |
| 2.08E-10    | 0.041569947 | 0.232780613 | 1.82E-06    | 0.956561063 | 0.392379015 |
| 2.43E-05    | 0.690179429 | 0.436432824 | 0.000107857 | 0.023307747 | 0.104658561 |
| 7.92E-18    | 0.080126195 | 0.180910975 | 5.70E-10    | 0.119076961 | 0.108112781 |
| 1.14E-09    | 0.001069912 | 0.00050123  | 4.39E-07    | 0.947810485 | 0.642518549 |
| 6.69E-14    | 0.12852852  | 5.51E-07    | 4.26E-07    | 0.236872886 | 0.097206129 |
| 4.92E-13    | 8.90E-08    | 0.416152744 | 6.45E-12    | 1.31E-09    | 4.52E-06    |
| 5.66E-14    | 0.05737106  | 6.69E-05    | 0.004026851 | 0.781231182 | 0.283302365 |
| 1.15E-31    | 0.870714237 | 0.934208519 | 8.60E-27    | 0.670811649 | 0.021330307 |
| 4.12E-22    | 0.832619197 | 0.152447362 | 3.30E-13    | 0.179559988 | 0.058698978 |
| 2.34E-20    | 0.00166411  | 8.55E-05    | 2.61E-15    | 0.267449555 | 0.543311471 |
| 3.76E-06    | 0.111823336 | 0.63139311  | 6.32E-06    | 0.647264355 | 0.02546191  |
| 6.50E-21    | 0.941444008 | 0.031996756 | 2.67E-19    | 2.85E-06    | 1.83E-07    |
| 6.17E-12    | 0.749553443 | 0.004573557 | 1.19E-05    | 0.11245136  | 0.536360445 |
| 9.02E-05    | 0.251723285 | 3.70E-09    | 0.145073759 | 0.000191096 | 0.000373246 |
| 8.63E-18    | 0.085592708 | 0.003332925 | 0.000522559 | 0.122219069 | 0.080196948 |
| 8.16E-13    | 0.057732553 | 0.232944672 | 0.002726583 | 0.278831524 | 0.550762355 |
| 4.95E-11    | 4.86E-06    | 0.948356725 | 7.43E-05    | 0.008054023 | 0.744810005 |
| 6.10E-17    | 0.320314924 | 0.296470495 | 5.69E-12    | 0.00428663  | 0.010445254 |
| 0.028286152 | 0.04233405  | 7.03E-05    | 0.916332729 | 0.071295709 | 0.023854272 |
| 0.000929261 | 1.31E-05    | 0.961894527 | 0.001610499 | 0.44235388  | 0.41263004  |

|             |             |             |             |             |             |
|-------------|-------------|-------------|-------------|-------------|-------------|
| 3.65E-14    | 0.00040233  | 0.357900664 | 1.12E-07    | 0.46006544  | 0.362943419 |
| 7.93E-06    | 0.761121961 | 0.024867112 | 0.07460095  | 0.411224645 | 0.112419885 |
| 1.31E-09    | 0.007709002 | 0.858794011 | 1.10E-05    | 0.361247786 | 0.073260066 |
| 2.30E-05    | 0.198923997 | 1.81E-17    | 0.76370008  | 1.75E-10    | 3.89E-11    |
| 3.05E-16    | 0.082209538 | 0.014405073 | 2.39E-05    | 0.54115748  | 0.606952909 |
| 1.14E-24    | 0.002015935 | 0.97844427  | 6.85E-08    | 0.020706293 | 0.056199061 |
| 1.92E-06    | 0.257387333 | 0.000187341 | 1.68E-12    | 2.67E-08    | 9.66E-09    |
| 3.13E-10    | 0.025578969 | 0.056211391 | 0.166590624 | 0.022293736 | 0.094483015 |
| 0.000984999 | 0.046440864 | 0.0585187   | 0.022843428 | 0.392008499 | 0.01337377  |
| 9.74E-25    | 0.783074227 | 0.001925743 | 1.96E-34    | 2.30E-06    | 2.59E-09    |
| 8.35E-13    | 0.145973285 | 0.59480085  | 2.80E-05    | 0.000648892 | 0.003170238 |
| 2.20E-12    | 0.693482825 | 0.16802676  | 2.79E-09    | 0.000101421 | 0.000666386 |
| 8.83E-26    | 0.056785861 | 1.82E-06    | 2.61E-13    | 0.249644034 | 0.308585534 |
| 4.21E-15    | 0.406972323 | 0.155400778 | 2.15E-05    | 0.117898324 | 0.359465039 |
| 2.31E-05    | 0.319353265 | 0.04753821  | 0.001831641 | 0.0122769   | 0.012933012 |
| 1.08E-15    | 0.039642326 | 2.00E-09    | 1.53E-23    | 7.54E-09    | 3.71E-16    |
| 1.61E-15    | 0.430522204 | 0.872361217 | 8.73E-05    | 0.023592191 | 0.170325247 |
| 5.47E-11    | 0.028740774 | 0.75636661  | 1.41E-13    | 0.001722438 | 0.000169122 |
| 1.04E-08    | 0.003692554 | 0.413609509 | 3.83E-10    | 0.048653419 | 0.027148219 |
| 1.06E-06    | 0.214521151 | 0.051000264 | 0.069040682 | 0.976385407 | 0.810191405 |
| 7.83E-12    | 0.009834033 | 0.000196691 | 4.53E-05    | 0.420214283 | 0.78415032  |
| 1.68E-14    | 0.027105774 | 0.015132688 | 1.33E-05    | 0.335649576 | 0.420460453 |
| 1.19E-16    | 0.004864477 | 0.00027977  | 6.24E-09    | 0.246617772 | 0.481182444 |
| 6.08E-19    | 0.000295804 | 0.068276939 | 4.62E-12    | 0.000906543 | 0.029504803 |
| 7.34E-28    | 0.225797609 | 0.982410544 | 1.43E-20    | 4.15E-05    | 3.11E-05    |
| 9.77E-09    | 0.000233071 | 0.598489053 | 4.35E-05    | 0.000106881 | 0.00411026  |
| 3.73E-19    | 0.41847934  | 0.807539217 | 7.41E-10    | 0.00024447  | 0.002730817 |
| 2.49E-07    | 0.001079259 | 0.673648678 | 0.001437631 | 0.374638981 | 0.291518368 |
| 1.70E-12    | 0.555710559 | 0.000692985 | 0.015721863 | 0.850385762 | 0.381451381 |
| 3.57E-09    | 0.527641502 | 3.67E-06    | 0.455804788 | 0.09878955  | 0.227754313 |
| 1.96E-10    | 0.349476951 | 0.106996147 | 0.004698667 | 0.002722065 | 0.024092529 |
| 8.68E-15    | 0.121026551 | 0.000186693 | 0.061127798 | 0.476226885 | 0.098468782 |
| 3.92E-25    | 0.212747251 | 0.823907635 | 7.50E-25    | 1.17E-05    | 6.21E-06    |
| 6.67E-13    | 0.000953527 | 0.001142055 | 0.001735927 | 0.286411413 | 0.275581479 |
| 8.67E-18    | 0.706756565 | 0.069543264 | 1.03E-12    | 3.25E-05    | 5.66E-05    |
| 1.99E-11    | 0.135569971 | 0.380934667 | 6.44E-09    | 0.008940506 | 0.015533431 |
| 1.94E-25    | 0.64812663  | 0.190761126 | 1.65E-11    | 3.83E-06    | 0.012347048 |
| 2.23E-12    | 2.11E-08    | 0.025018927 | 4.15E-06    | 0.568806345 | 0.034686747 |
| 1.90E-10    | 0.113137394 | 0.000881903 | 9.40E-07    | 0.000268934 | 6.00E-05    |
| 2.98E-09    | 0.279550647 | 1.24E-15    | 0.055880138 | 9.13E-09    | 1.88E-06    |
| 3.68E-12    | 6.79E-05    | 0.238903167 | 3.90E-09    | 0.091893066 | 0.425779805 |
| 3.75E-21    | 0.069991938 | 0.007444253 | 1.33E-24    | 3.16E-06    | 5.60E-10    |
| 2.03E-12    | 0.003384665 | 0.273211697 | 7.54E-09    | 0.213639791 | 0.248109046 |
| 7.27E-08    | 0.012510061 | 1.17E-07    | 0.009414043 | 0.644512852 | 0.102137949 |
| 0.850410315 | 0.000368155 | 0.149283049 | 0.042189353 | 0.636992544 | 0.943532075 |

|             |             |             |             |             |             |
|-------------|-------------|-------------|-------------|-------------|-------------|
| 2.07E-11    | 0.246258453 | 5.75E-05    | 2.42E-07    | 0.456652993 | 0.488063433 |
| 0.00130855  | 2.86E-08    | 1.11E-06    | 2.92E-05    | 0.220148472 | 0.104948233 |
| 1.10E-22    | 0.478711895 | 0.403215818 | 3.69E-18    | 0.005900373 | 0.007590463 |
| 1.83E-10    | 0.586624491 | 0.135367347 | 2.77E-06    | 0.439817858 | 0.366873626 |
| 0.411876689 | 0.659542101 | 2.04E-09    | 0.579004952 | 3.90E-12    | 1.62E-09    |



| p.MMdarker  | p.MMbrown   | p.MMsaddl | p.MMoranger | p.MMdarl | p.MMdarkturtur | p.MMgrec |
|-------------|-------------|-----------|-------------|----------|----------------|----------|
| 5.62E-18    | 0.000552894 | 1.49E-28  | 0.326665113 | 0.04749  | 0.00508868     | 0.06766  |
| 6.36E-13    | 3.91E-20    | 1.37E-57  | 0.558956945 | 0.66906  | 0.707495443    | 1.51E-05 |
| 6.05E-05    | 4.76E-07    | 5.30E-35  | 0.280811487 | 0.79382  | 0.99908585     | 9.98E-12 |
| 0.007064401 | 2.62E-05    | 8.79E-37  | 0.09739826  | 0.01711  | 1.18E-17       | 2.97E-12 |
| 8.48E-11    | 4.79E-09    | 6.49E-53  | 0.082462129 | 0.0001   | 3.05E-15       | 4.76E-06 |
| 0.002055263 | 6.60E-22    | 3.14E-68  | 0.857179745 | 0.07388  | 0.16532012     | 9.31E-17 |
| 2.30E-25    | 2.89E-06    | 5.81E-33  | 0.3812909   | 0.00596  | 0.038556527    | 0.86883  |
| 6.75E-21    | 0.017654567 | 1.27E-30  | 0.559715234 | 0.11845  | 0.085981442    | 0.22897  |
| 2.54E-16    | 3.83E-16    | 2.96E-57  | 0.90211961  | 0.6135   | 0.273801537    | 0.9115   |
| 6.75E-27    | 4.11E-14    | 5.17E-49  | 0.193523203 | 7.48E-05 | 0.002342717    | 1.25E-05 |
| 2.00E-19    | 4.04E-21    | 3.44E-79  | 0.620692737 | 0.01733  | 0.029174522    | 0.12692  |
| 5.22E-22    | 1.04E-10    | 2.39E-65  | 0.723909996 | 0.03546  | 0.933529963    | 0.05688  |
| 1.46E-21    | 1.13E-10    | 4.12E-61  | 0.132429487 | 0.32683  | 0.116133782    | 0.03552  |
| 5.10E-11    | 0.000375187 | 1.39E-32  | 0.023692438 | 2.27E-05 | 4.70E-20       | 0.001    |
| 0.045706828 | 0.000251252 | 4.00E-38  | 0.17308905  | 0.19267  | 1.14E-12       | 0.02782  |
| 0.046181656 | 4.98E-09    | 6.83E-53  | 0.912252912 | 0.30718  | 1.17E-05       | 1.20E-09 |
| 1.35E-10    | 1.95E-12    | 4.08E-41  | 0.409352663 | 0.04889  | 0.018887341    | 3.60E-11 |
| 0.004158352 | 5.39E-15    | 1.03E-55  | 0.028956408 | 0.54835  | 1.76E-05       | 5.26E-10 |
| 5.68E-23    | 1.16E-21    | 8.99E-131 | 0.23140715  | 0.00286  | 6.11E-05       | 0.00015  |
| 2.04E-11    | 2.24E-11    | 1.76E-39  | 0.197889203 | 0.0001   | 2.79E-08       | 0.02901  |
| 0.054323653 | 5.50E-08    | 7.45E-28  | 0.767645719 | 0.77376  | 0.462401378    | 1.99E-07 |
| 0.006685379 | 3.61E-07    | 1.08E-32  | 0.052702626 | 0.03269  | 2.35E-11       | 0.00087  |
| 3.82E-11    | 0.002374069 | 4.62E-61  | 0.081075904 | 6.83E-09 | 8.50E-06       | 0.00141  |
| 1.36E-11    | 8.93E-07    | 3.20E-37  | 0.889035955 | 0.11387  | 0.000648188    | 0.0845   |
| 4.19E-07    | 1.61E-06    | 5.11E-45  | 0.710556988 | 0.30562  | 0.104702372    | 0.17376  |
| 4.30E-11    | 2.35E-05    | 2.59E-41  | 0.896638978 | 0.02044  | 0.245717776    | 3.88E-05 |
| 0.073308846 | 6.16E-05    | 1.35E-41  | 0.739139924 | 0.4808   | 0.002148871    | 3.82E-14 |
| 1.92E-07    | 9.09E-06    | 1.46E-60  | 0.175700961 | 5.70E-06 | 9.02E-05       | 0.00143  |
| 0.007526204 | 2.35E-05    | 3.88E-61  | 0.248745183 | 0.01105  | 4.24E-09       | 1.24E-19 |
| 1.03E-21    | 2.14E-19    | 1.47E-80  | 0.668224826 | 0.53288  | 0.202838185    | 0.09292  |
| 0.004004354 | 1.08E-11    | 2.42E-39  | 0.26225367  | 0.55856  | 0.442555433    | 2.31E-12 |
| 2.07E-19    | 0.000197177 | 7.02E-35  | 0.125675359 | 5.86E-10 | 7.93E-05       | 0.34818  |
| 1.01E-67    | 4.35E-35    | 5.86E-62  | 0.956427731 | 0.08031  | 0.486946179    | 0.97131  |
| 0.007586684 | 4.93E-08    | 4.29E-36  | 0.098999647 | 0.00023  | 2.68E-21       | 4.46E-10 |
| 1.37E-15    | 8.48E-12    | 2.28E-36  | 0.710452374 | 0.12259  | 0.158879535    | 0.50908  |
| 1.27E-12    | 6.95E-13    | 8.80E-38  | 0.160192659 | 0.00053  | 1.15E-06       | 0.91544  |
| 2.10E-13    | 3.40E-12    | 5.46E-30  | 0.121385531 | 0.48139  | 5.08E-05       | 0.00115  |
| 1.37E-16    | 1.36E-09    | 1.26E-35  | 0.305856212 | 9.48E-05 | 1.48E-05       | 0.35284  |
| 1.29E-23    | 4.70E-12    | 3.95E-36  | 0.61354461  | 0.6382   | 0.490367633    | 0.52016  |
| 0.591354972 | 8.36E-12    | 1.41E-42  | 0.426546244 | 0.88823  | 8.96E-07       | 9.35E-11 |
| 2.75E-12    | 2.61E-12    | 1.53E-85  | 0.035934246 | 4.09E-05 | 3.61E-15       | 1.36E-05 |
| 0.025434929 | 1.22E-05    | 1.28E-51  | 0.361373377 | 0.77163  | 0.000138826    | 4.60E-16 |
| 4.97E-11    | 0.000627319 | 7.06E-32  | 0.326880009 | 0.80192  | 0.29465401     | 0.02827  |
| 1.83E-25    | 0.000863606 | 8.95E-45  | 0.807506231 | 0.71766  | 0.445914445    | 0.56971  |

|             |             |           |             |          |             |          |
|-------------|-------------|-----------|-------------|----------|-------------|----------|
| 0.000135349 | 2.28E-12    | 2.29E-61  | 0.296473871 | 0.22439  | 0.000107773 | 0.83873  |
| 0.006300225 | 1.47E-19    | 3.08E-69  | 0.716729337 | 0.01876  | 0.475087912 | 1.34E-10 |
| 2.14E-24    | 8.04E-17    | 4.15E-46  | 0.925795914 | 0.26671  | 0.986136506 | 0.11952  |
| 0.939076104 | 2.83E-28    | 4.57E-47  | 0.781583994 | 0.40905  | 0.001900076 | 1.79E-27 |
| 0.002879773 | 3.37E-08    | 1.57E-44  | 0.173465167 | 0.01421  | 5.36E-10    | 1.29E-05 |
| 0.126910403 | 0.032716246 | 1.19E-21  | 0.931366063 | 0.35073  | 4.40E-05    | 4.19E-07 |
| 0.000336715 | 3.26E-09    | 2.00E-36  | 0.372622277 | 0.05681  | 2.17E-10    | 9.67E-13 |
| 1.67E-10    | 2.50E-13    | 2.66E-44  | 0.342940213 | 0.44125  | 0.14802426  | 0.89138  |
| 2.11E-05    | 2.83E-10    | 6.28E-81  | 0.062578901 | 0.23211  | 1.74E-16    | 0.00857  |
| 3.35E-05    | 0.001926297 | 3.00E-65  | 0.026553347 | 9.58E-06 | 1.89E-10    | 0.08809  |
| 2.78E-27    | 1.10E-07    | 1.14E-21  | 0.396726941 | 0.00601  | 0.03568292  | 0.4335   |
| 6.84E-08    | 3.86E-08    | 1.58E-46  | 0.208513922 | 0.16093  | 6.16E-10    | 0.47244  |
| 1.53E-15    | 5.71E-17    | 1.20E-44  | 0.515918354 | 0.32456  | 0.068882792 | 0.06593  |
| 7.53E-21    | 6.41E-13    | 2.35E-32  | 0.395591419 | 0.01602  | 0.447392163 | 7.34E-06 |
| 2.12E-05    | 4.76E-07    | 1.41E-28  | 0.822999132 | 0.2212   | 0.239910506 | 0.30577  |
| 0.001377992 | 8.82E-09    | 6.56E-44  | 0.550341905 | 0.12605  | 4.88E-05    | 0.30724  |
| 8.05E-11    | 3.76E-11    | 7.85E-86  | 0.186733303 | 0.02908  | 0.009732923 | 0.01995  |
| 0.024723378 | 5.22E-24    | 3.93E-45  | 0.908175029 | 0.03552  | 0.02472349  | 3.45E-24 |
| 0.015581271 | 3.11E-14    | 6.90E-30  | 0.94922694  | 0.13752  | 0.000440212 | 8.16E-15 |
| 2.47E-08    | 7.55E-07    | 1.98E-44  | 0.891309936 | 0.34047  | 0.221831813 | 0.07773  |
| 0.418207136 | 2.43E-10    | 5.73E-33  | 0.507095086 | 0.38159  | 0.806143333 | 0.96385  |
| 8.90E-27    | 6.20E-21    | 8.51E-62  | 0.608290263 | 0.90234  | 0.296510162 | 0.03418  |
| 6.61E-56    | 1.24E-09    | 1.31E-48  | 0.613605496 | 0.21875  | 0.307465384 | 0.13072  |
| 0.000801988 | 0.003616099 | 3.85E-44  | 0.388038642 | 0.00254  | 0.000301619 | 0.08655  |
| 0.684373803 | 8.12E-05    | 2.04E-24  | 0.77819535  | 0.64346  | 0.770915005 | 1.26E-17 |
| 0.058891542 | 0.000924624 | 1.33E-37  | 0.15175661  | 0.02286  | 2.27E-06    | 0.00351  |
| 0.223869951 | 8.03E-06    | 1.40E-19  | 0.938580543 | 0.38625  | 0.13736607  | 5.83E-07 |
| 0.806244456 | 2.00E-07    | 7.09E-54  | 0.392497097 | 0.71855  | 0.001329135 | 1.09E-08 |
| 0.071438402 | 1.13E-19    | 8.60E-84  | 0.459057355 | 0.9262   | 4.18E-11    | 3.24E-15 |
| 0.000399299 | 1.12E-24    | 4.78E-80  | 0.047348668 | 6.45E-06 | 4.55E-11    | 7.00E-18 |
| 2.95E-06    | 1.63E-09    | 6.83E-40  | 0.503648828 | 0.31451  | 0.002872908 | 0.00639  |
| 0.885279053 | 0.001153327 | 1.28E-34  | 0.164543895 | 0.17002  | 0.009028854 | 5.59E-07 |
| 1.48E-06    | 4.60E-13    | 1.01E-67  | 0.170837571 | 0.01378  | 0.000105815 | 5.30E-06 |
| 9.77E-11    | 1.84E-25    | 2.27E-185 | 0.278998369 | 0.47202  | 2.80E-05    | 1.87E-07 |
| 0.201534001 | 1.08E-09    | 1.43E-61  | 0.485753104 | 0.05583  | 3.72E-06    | 7.90E-09 |
| 6.71E-06    | 2.75E-09    | 6.87E-32  | 0.40615139  | 0.19735  | 0.007603802 | 7.38E-07 |
| 2.73E-10    | 1.22E-07    | 1.80E-69  | 0.956911995 | 0.17843  | 0.021541981 | 1.01E-05 |
| 1.70E-15    | 5.05E-14    | 1.84E-53  | 0.225020384 | 0.00295  | 1.08E-05    | 0.00026  |
| 1.59E-07    | 2.11E-07    | 1.80E-25  | 0.994152292 | 0.25824  | 2.95E-08    | 1.68E-11 |
| 2.81E-20    | 2.13E-11    | 1.52E-73  | 0.670630372 | 0.02647  | 0.281156877 | 0.1398   |
| 1.02E-14    | 4.26E-08    | 2.32E-39  | 0.232808338 | 0.13447  | 0.000138135 | 0.00179  |
| 3.06E-09    | 1.93E-07    | 4.83E-43  | 0.754758332 | 0.56746  | 0.004220724 | 0.01103  |
| 8.73E-13    | 7.00E-19    | 1.71E-108 | 0.721543989 | 0.64497  | 0.135478336 | 1.06E-12 |
| 0.343627699 | 0.001320041 | 1.82E-18  | 0.462170114 | 0.81281  | 5.54E-06    | 4.14E-06 |
| 5.08E-11    | 0.000154942 | 6.50E-07  | 0.283528669 | 0.07666  | 0.000748045 | 0.00019  |

|             |             |           |             |          |             |          |
|-------------|-------------|-----------|-------------|----------|-------------|----------|
| 8.93E-19    | 3.22E-06    | 4.39E-37  | 0.919758287 | 0.00802  | 0.706233447 | 4.76E-10 |
| 0.873342692 | 1.22E-09    | 8.00E-32  | 0.596661703 | 0.01879  | 0.565024768 | 9.07E-05 |
| 9.31E-25    | 4.93E-05    | 1.49E-32  | 0.020671262 | 6.32E-07 | 3.12E-07    | 0.50849  |
| 0.104174877 | 1.43E-25    | 4.17E-61  | 0.61779514  | 0.04787  | 0.000871133 | 2.66E-18 |
| 2.39E-17    | 1.14E-13    | 2.51E-84  | 0.59140745  | 0.28495  | 0.745004582 | 5.83E-10 |
| 1.05E-07    | 0.001416901 | 4.28E-38  | 0.447991077 | 0.00322  | 0.662723631 | 0.0014   |
| 2.63E-24    | 2.24E-10    | 5.92E-27  | 0.7033767   | 0.10866  | 0.037257863 | 0.00696  |
| 0.008982936 | 1.11E-07    | 2.13E-29  | 0.909914017 | 0.28112  | 0.98431545  | 0.64944  |
| 2.10E-09    | 2.80E-08    | 3.97E-28  | 0.680316096 | 0.70363  | 0.89964969  | 0.0176   |
| 2.18E-36    | 5.98E-16    | 1.72E-111 | 0.280846951 | 0.00241  | 6.22E-06    | 0.001    |
| 0.000103164 | 5.21E-06    | 2.24E-43  | 0.91737484  | 0.7053   | 0.836920962 | 0.00012  |
| 3.70E-21    | 6.78E-20    | 9.79E-64  | 0.880080631 | 0.63475  | 0.121218245 | 0.17113  |
| 0.701988947 | 1.60E-05    | 1.97E-40  | 0.409486335 | 0.50272  | 0.783616417 | 1.53E-09 |
| 1.59E-08    | 0.000172014 | 2.07E-34  | 0.762816051 | 0.00023  | 0.031141416 | 2.42E-07 |
| 1.17E-13    | 1.49E-06    | 1.48E-29  | 0.899004104 | 0.21622  | 0.046583481 | 0.0005   |
| 2.97E-60    | 4.16E-14    | 1.94E-80  | 0.739488074 | 0.04021  | 0.353588539 | 0.00769  |
| 3.62E-29    | 1.86E-08    | 2.21E-38  | 0.373434328 | 6.51E-06 | 0.002136916 | 0.24321  |
| 0.000323097 | 1.16E-19    | 2.01E-66  | 0.021424885 | 0.35386  | 2.53E-14    | 3.42E-11 |
| 0.684531482 | 6.33E-20    | 1.21E-53  | 0.667559333 | 0.00356  | 0.899633471 | 2.63E-12 |
| 2.98E-23    | 6.57E-09    | 6.65E-33  | 0.694265683 | 0.36321  | 0.006741614 | 0.97391  |
| 0.747377168 | 1.52E-08    | 3.02E-71  | 0.078908602 | 0.88241  | 9.12E-14    | 1.10E-09 |
| 1.36E-14    | 8.09E-12    | 2.12E-60  | 0.043425146 | 4.85E-10 | 1.59E-10    | 9.84E-10 |
| 0.004717359 | 0.000213522 | 3.11E-40  | 0.559842376 | 0.02492  | 6.86E-10    | 0.08416  |
| 0.808670746 | 0.002313838 | 5.89E-39  | 0.267936548 | 0.52247  | 0.029437072 | 0.01474  |
| 1.74E-20    | 2.93E-23    | 1.69E-179 | 0.807264857 | 0.23758  | 0.105590504 | 1.52E-06 |
| 0.005549853 | 3.45E-06    | 5.69E-35  | 0.52037734  | 0.82065  | 0.022911817 | 4.17E-06 |
| 3.40E-20    | 8.89E-11    | 6.44E-55  | 0.419953347 | 0.00104  | 0.803112693 | 0.09547  |
| 4.85E-32    | 4.25E-21    | 1.92E-50  | 0.974717353 | 0.83106  | 0.014170303 | 0.01037  |
| 8.57E-06    | 0.008016033 | 1.05E-32  | 0.111854209 | 1.34E-05 | 5.60E-07    | 0.77289  |
| 3.35E-14    | 8.72E-13    | 1.04E-34  | 0.497457378 | 0.03642  | 0.029110641 | 0.17911  |
| 1.09E-15    | 3.17E-05    | 1.11E-31  | 0.903858512 | 0.67996  | 0.108888834 | 1.63E-07 |
| 1.84E-10    | 2.94E-10    | 9.29E-59  | 0.525287643 | 0.29641  | 0.002343651 | 0.17816  |
| 6.13E-11    | 5.91E-19    | 4.15E-109 | 0.751999116 | 0.18649  | 0.014061156 | 8.24E-08 |
| 3.22E-30    | 1.39E-16    | 1.34E-43  | 0.101968624 | 1.80E-08 | 0.000965297 | 0.00117  |
| 1.26E-06    | 0.015644408 | 9.11E-40  | 0.912419018 | 0.51017  | 0.267456052 | 0.07862  |
| 8.98E-11    | 0.176442761 | 1.53E-36  | 0.97575645  | 0.00024  | 3.73E-08    | 0.00067  |
| 9.17E-19    | 0.000168119 | 3.94E-41  | 0.400747935 | 0.00295  | 0.005633153 | 0.41515  |
| 2.06E-32    | 4.60E-18    | 1.25E-45  | 0.80801101  | 0.37875  | 0.525325373 | 0.00043  |
| 1.42E-22    | 0.000607539 | 5.60E-49  | 0.037094929 | 1.35E-08 | 1.24E-07    | 0.51546  |
| 0.00084015  | 3.95E-07    | 2.65E-38  | 0.187508876 | 0.02489  | 1.49E-08    | 1.04E-14 |
| 0.492240462 | 6.71E-08    | 2.60E-40  | 0.508664826 | 0.2825   | 0.918207025 | 7.96E-12 |
| 4.35E-33    | 5.78E-14    | 6.45E-85  | 0.069154597 | 0.00344  | 0.270973731 | 4.99E-05 |
| 4.27E-05    | 0.000331106 | 2.75E-42  | 0.140351431 | 0.00494  | 4.16E-06    | 3.26E-05 |
| 0.080375956 | 7.50E-06    | 2.32E-34  | 0.395967387 | 0.27917  | 5.20E-09    | 1.46E-08 |
| 0.040404934 | 1.40E-07    | 5.02E-16  | 0.937323307 | 0.25717  | 2.19E-12    | 2.17E-13 |

|             |          |           |             |         |             |          |
|-------------|----------|-----------|-------------|---------|-------------|----------|
| 0.07051846  | 4.48E-06 | 5.34E-39  | 0.526938259 | 0.00898 | 0.000210081 | 2.74E-14 |
| 9.40E-07    | 5.44E-08 | 3.15E-19  | 0.545892308 | 0.19123 | 3.08E-06    | 3.05E-14 |
| 7.72E-11    | 2.47E-31 | 1.65E-105 | 0.353316149 | 0.82495 | 0.012248246 | 8.33E-09 |
| 1.41E-10    | 3.14E-06 | 4.40E-38  | 0.716612306 | 0.00019 | 0.001171945 | 7.85E-11 |
| 0.007685463 | 1.47E-17 | 2.06E-25  | 0.378732955 | 0.12167 | 4.32E-07    | 5.56E-17 |

| p.MMlightgre | p.MMmag  | p.MMblack   | p.MMdarl | p.MMblue    | p.MMsalmon  | p.MMbrown4  |
|--------------|----------|-------------|----------|-------------|-------------|-------------|
| 9.01E-10     | 1.96E-15 | 1.50E-06    | 0.0004   | 0.026154353 | 0.108237758 | 0.022468842 |
| 6.58E-13     | 0.02082  | 0.007603649 | 0.06816  | 0.084708058 | 1.79E-07    | 0.143954299 |
| 3.45E-17     | 3.70E-06 | 3.18E-06    | 4.34E-12 | 0.003674305 | 0.00899237  | 0.71011258  |
| 3.18E-06     | 0.09158  | 0.451681627 | 0.01925  | 0.110451385 | 0.402298566 | 0.003731266 |
| 0.000109136  | 0.0855   | 0.002009081 | 0.28252  | 0.000342887 | 0.037191496 | 8.78E-10    |
| 1.37E-07     | 0.11099  | 0.013623725 | 0.2452   | 0.009336706 | 0.024970939 | 0.000793581 |
| 0.244537197  | 0.11934  | 0.003123285 | 0.00028  | 6.51E-07    | 3.02E-05    | 0.601370982 |
| 0.536547768  | 1.40E-08 | 0.144840814 | 0.58623  | 1.93E-07    | 0.008395126 | 0.976466953 |
| 5.31E-06     | 0.00647  | 0.783106603 | 0.384    | 0.000157511 | 2.40E-06    | 0.000753852 |
| 0.273124993  | 0.00319  | 0.010062909 | 0.3214   | 0.395373483 | 0.753810693 | 0.000321623 |
| 0.859723325  | 0.24985  | 0.822141337 | 0.30627  | 0.067735321 | 0.069232543 | 0.000365932 |
| 0.071007287  | 0.03304  | 0.000667106 | 3.61E-05 | 1.29E-05    | 1.14E-05    | 0.968490499 |
| 0.022646138  | 0.98875  | 0.715488097 | 0.30932  | 0.573263465 | 0.439167126 | 0.022606233 |
| 0.295570256  | 0.18578  | 0.027595398 | 0.58709  | 0.261385746 | 0.493680197 | 0.002779592 |
| 0.000921086  | 0.17515  | 0.007762033 | 0.06207  | 0.002039176 | 0.174193219 | 1.08E-07    |
| 0.000131321  | 0.19104  | 0.061671781 | 0.00036  | 0.185324046 | 0.022710094 | 0.178866361 |
| 0.00026275   | 0.51449  | 0.187269092 | 0.33152  | 0.071601883 | 0.323111108 | 0.060465247 |
| 6.15E-05     | 0.06263  | 0.059108958 | 0.00038  | 0.212484223 | 0.062501163 | 0.043015299 |
| 0.584372874  | 0.00338  | 0.00181026  | 0.0569   | 0.081980392 | 0.591687315 | 5.72E-08    |
| 0.022288777  | 0.8749   | 0.018812339 | 0.11783  | 0.000676432 | 0.193948057 | 1.19E-06    |
| 0.000273864  | 0.12471  | 0.06118792  | 0.44478  | 0.136390256 | 0.317668605 | 0.182033214 |
| 7.27E-05     | 0.75781  | 0.338819283 | 0.38769  | 0.086525607 | 0.190383872 | 0.001264268 |
| 0.002420535  | 0.8436   | 0.199021097 | 0.68508  | 0.321298091 | 0.429677857 | 2.61E-06    |
| 0.018831035  | 0.09655  | 0.017686553 | 0.02297  | 0.102513489 | 0.001403644 | 0.264710003 |
| 0.936266209  | 0.00015  | 0.018126388 | 0.20984  | 0.750209922 | 0.343572131 | 0.002525003 |
| 0.055155991  | 0.08011  | 0.636095571 | 0.05139  | 0.045266685 | 0.576856965 | 0.019216184 |
| 2.60E-05     | 0.31882  | 0.205677486 | 0.00563  | 0.944758088 | 0.151116716 | 3.68E-08    |
| 7.91E-06     | 0.67332  | 0.30259234  | 0.01315  | 0.039506496 | 0.077966844 | 0.003393268 |
| 2.40E-15     | 0.19655  | 0.149549979 | 4.30E-06 | 0.726612235 | 0.097415161 | 0.62712588  |
| 0.351940889  | 0.95171  | 0.176953515 | 0.13255  | 0.045194681 | 0.000115627 | 0.304121426 |
| 0.917342171  | 0.0003   | 0.028680806 | 0.86028  | 0.558407601 | 0.60829176  | 0.000469108 |
| 0.002677426  | 0.05778  | 0.588544362 | 0.75911  | 1.76E-06    | 1.05E-05    | 0.013256542 |
| 0.003673622  | 0.05756  | 0.784490365 | 0.48313  | 0.004338557 | 0.000259211 | 0.122395404 |
| 0.890566391  | 0.68541  | 0.952986487 | 0.15066  | 0.302000763 | 0.049579838 | 1.90E-05    |
| 0.001367006  | 0.08743  | 0.384823901 | 0.15567  | 0.982544834 | 0.345274799 | 0.540163547 |
| 0.943871879  | 0.00014  | 3.64E-07    | 0.00022  | 0.001090367 | 0.002240891 | 1.84E-09    |
| 0.000575011  | 0.90946  | 0.406355262 | 0.02004  | 0.139177318 | 0.024813965 | 0.150556065 |
| 0.62255746   | 0.07748  | 0.022728613 | 0.01693  | 0.087221071 | 0.477821827 | 0.000479159 |
| 0.842015339  | 0.18889  | 0.040202548 | 0.02842  | 0.121109447 | 0.68304275  | 0.010015961 |
| 5.34E-16     | 0.31676  | 0.469366091 | 0.04708  | 0.000158922 | 0.014697001 | 3.26E-08    |
| 0.006357105  | 0.25045  | 0.027650595 | 0.9586   | 0.053904405 | 0.518215735 | 2.22E-08    |
| 7.62E-10     | 0.00027  | 0.013049588 | 0.00069  | 0.144547435 | 0.017383228 | 2.78E-07    |
| 0.250278388  | 0.9556   | 0.207138006 | 0.13615  | 0.001946761 | 8.72E-06    | 0.005764671 |
| 0.000131537  | 9.98E-18 | 1.26E-11    | 1.28E-06 | 0.676374395 | 0.019516375 | 0.022718795 |

|             |          |             |          |             |             |             |
|-------------|----------|-------------|----------|-------------|-------------|-------------|
| 0.066674815 | 0.19371  | 0.825768058 | 0.87894  | 0.319826462 | 0.831827412 | 1.21E-08    |
| 3.39E-07    | 0.61202  | 0.002469865 | 0.51697  | 9.04E-09    | 0.001362915 | 8.61E-08    |
| 0.234105355 | 0.08349  | 0.010210238 | 0.00539  | 0.001056817 | 4.17E-05    | 0.439481776 |
| 1.15E-11    | 0.53253  | 0.877025494 | 0.00259  | 0.029485257 | 0.919291848 | 0.000459192 |
| 0.182841295 | 0.00119  | 8.50E-05    | 0.04164  | 0.000683783 | 0.002419814 | 4.73E-10    |
| 0.006660621 | 0.21997  | 0.00752747  | 8.88E-07 | 0.000357385 | 0.000768307 | 0.350169826 |
| 4.01E-08    | 0.41541  | 0.098612408 | 0.55427  | 3.22E-06    | 0.067579248 | 7.40E-11    |
| 0.425528032 | 0.3078   | 0.767993623 | 0.43931  | 0.084527381 | 0.2610029   | 0.005893433 |
| 0.057159094 | 0.89494  | 0.289127864 | 0.17587  | 0.191156083 | 0.002171624 | 4.55E-07    |
| 0.326254938 | 0.01031  | 0.003226465 | 0.04963  | 0.357085866 | 0.551733058 | 3.20E-13    |
| 0.120368644 | 0.05176  | 0.025401619 | 0.00175  | 0.219568768 | 0.848975552 | 0.029420768 |
| 0.610443956 | 0.07241  | 4.28E-05    | 0.00014  | 1.13E-05    | 0.005869348 | 1.50E-14    |
| 0.351482114 | 0.19357  | 0.323530164 | 0.363    | 0.012796697 | 0.28184273  | 1.90E-07    |
| 0.143744388 | 0.05664  | 0.039347849 | 0.80596  | 0.539233839 | 0.166951909 | 0.128128447 |
| 0.248494996 | 0.00109  | 0.000279726 | 7.38E-05 | 0.002031109 | 0.000350403 | 0.32730983  |
| 0.054573235 | 4.13E-09 | 2.94E-06    | 0.00038  | 0.012133994 | 0.000174448 | 0.018984167 |
| 0.0015271   | 0.20883  | 0.829257605 | 0.21773  | 0.783024238 | 0.321690285 | 4.46E-06    |
| 3.08E-10    | 0.44793  | 0.214716773 | 0.01322  | 0.002576036 | 0.105998927 | 1.84E-05    |
| 0.002874639 | 7.80E-07 | 3.52E-10    | 0.00496  | 1.16E-10    | 6.99E-08    | 7.47E-09    |
| 0.034891522 | 0.93909  | 0.093514102 | 0.02952  | 0.005444393 | 0.021467316 | 0.052944193 |
| 1.69E-06    | 6.88E-05 | 0.000353203 | 4.37E-06 | 0.012812223 | 0.938438285 | 3.50E-17    |
| 0.016291558 | 0.51144  | 0.548520499 | 0.1085   | 0.336440731 | 0.180140079 | 0.013945567 |
| 0.266078161 | 0.51549  | 0.082239054 | 0.00126  | 1.78E-07    | 0.000574952 | 0.026113171 |
| 0.697505807 | 0.11062  | 0.07452504  | 0.1134   | 0.008604029 | 0.001688032 | 2.91E-07    |
| 9.69E-06    | 0.01808  | 4.66E-05    | 7.54E-10 | 0.00014584  | 4.47E-05    | 0.361853668 |
| 0.022381677 | 0.9713   | 0.752414684 | 0.173    | 0.584225221 | 0.685076293 | 4.46E-05    |
| 1.42E-14    | 7.97E-05 | 1.50E-05    | 1.85E-08 | 0.09734682  | 0.015246513 | 0.075404692 |
| 0.001500086 | 0.187    | 0.043049793 | 0.00088  | 0.048090099 | 0.028630354 | 5.14E-06    |
| 1.28E-08    | 0.14435  | 0.100687577 | 0.00018  | 0.781671694 | 0.023542476 | 0.032377812 |
| 0.000135784 | 0.81271  | 0.552086969 | 0.14699  | 0.170437006 | 0.390411458 | 4.28E-06    |
| 0.001487025 | 2.90E-07 | 8.56E-08    | 2.54E-06 | 0.00011476  | 5.75E-08    | 0.106746724 |
| 1.54E-11    | 5.85E-06 | 0.003346247 | 8.87E-05 | 0.721132807 | 0.38394177  | 0.007436932 |
| 0.02811096  | 1.57E-05 | 0.013200209 | 0.78498  | 0.902957844 | 0.613177127 | 4.50E-06    |
| 0.000364678 | 0.81096  | 0.990979523 | 0.04866  | 0.740116414 | 0.274328436 | 1.84E-06    |
| 0.00968574  | 0.43136  | 0.417283005 | 0.12376  | 0.949771996 | 0.035024714 | 1.14E-09    |
| 6.52E-19    | 0.34837  | 0.021309854 | 4.94E-08 | 0.063741078 | 0.617266975 | 0.011771467 |
| 2.85E-05    | 0.10865  | 0.00046559  | 9.08E-07 | 1.89E-05    | 0.00013747  | 0.913345787 |
| 8.22E-05    | 0.04485  | 0.248269818 | 0.06575  | 0.980941752 | 0.068628576 | 0.063683353 |
| 2.16E-06    | 0.4814   | 0.198724758 | 0.48503  | 0.001394612 | 0.164429745 | 0.000155607 |
| 0.047404316 | 4.31E-06 | 5.64E-09    | 5.06E-07 | 3.03E-05    | 0.120940015 | 7.31E-12    |
| 0.054289455 | 0.10681  | 0.000381785 | 5.53E-05 | 0.00315962  | 0.090250587 | 5.92E-08    |
| 0.007179397 | 5.60E-09 | 3.89E-07    | 0.03507  | 0.003952818 | 0.000123761 | 6.57E-07    |
| 6.61E-08    | 0.00344  | 0.000528933 | 8.26E-08 | 0.001381882 | 0.000846702 | 0.087686965 |
| 7.99E-05    | 0.23551  | 0.913882656 | 0.24005  | 0.020480905 | 0.971753627 | 0.010914681 |
| 0.086100392 | 0.34811  | 0.985295329 | 0.0193   | 0.001175492 | 0.973395771 | 0.00938678  |

|             |          |             |          |             |             |             |
|-------------|----------|-------------|----------|-------------|-------------|-------------|
| 0.005172797 | 0.10299  | 0.94165232  | 0.00535  | 0.002044471 | 0.605510745 | 0.234528542 |
| 0.180331538 | 0.83663  | 0.325753235 | 0.88601  | 0.029329344 | 0.318751147 | 0.000170925 |
| 0.685803111 | 0.49453  | 0.438800175 | 0.75997  | 0.195850436 | 0.572480326 | 0.260738418 |
| 3.27E-06    | 0.06121  | 1.64E-05    | 0.13206  | 6.48E-13    | 4.13E-05    | 1.00E-09    |
| 1.02E-08    | 0.01332  | 0.04742139  | 1.22E-05 | 0.157107769 | 0.110146026 | 0.079691974 |
| 0.032993924 | 0.02251  | 0.001006725 | 0.00013  | 0.021873274 | 0.132657706 | 6.38E-17    |
| 0.004088929 | 0.00389  | 2.36E-05    | 1.10E-07 | 2.34E-06    | 1.87E-06    | 0.024605628 |
| 0.732164832 | 0.00063  | 5.16E-06    | 0.00089  | 0.000116673 | 5.34E-07    | 2.40E-07    |
| 0.006236438 | 0.62966  | 0.217793535 | 0.00113  | 0.005296506 | 0.212602532 | 0.64972214  |
| 0.447587853 | 0.57168  | 0.131856818 | 0.00485  | 6.99E-06    | 5.38E-05    | 0.004878045 |
| 0.000592072 | 0.09877  | 0.05803402  | 0.00023  | 0.221024242 | 0.308767914 | 2.14E-09    |
| 0.006317836 | 0.02581  | 0.023246017 | 0.00372  | 0.015334088 | 0.01404864  | 0.039032793 |
| 0.133447256 | 0.21939  | 0.177050672 | 0.95282  | 0.130948448 | 0.988767913 | 3.14E-09    |
| 4.56E-05    | 0.00999  | 0.017319096 | 0.0002   | 0.064112017 | 0.025841641 | 0.204351574 |
| 0.388952055 | 0.57033  | 0.34204301  | 0.07238  | 0.022218626 | 0.001373368 | 0.131820936 |
| 0.001251349 | 0.45793  | 0.000405047 | 6.96E-09 | 4.87E-13    | 2.76E-07    | 0.184731955 |
| 0.16095581  | 0.08305  | 0.02947839  | 0.00364  | 0.264638461 | 0.794185385 | 2.33E-19    |
| 3.80E-12    | 0.00334  | 6.17E-06    | 1.32E-10 | 0.000574659 | 4.78E-06    | 0.668611761 |
| 9.83E-05    | 0.03413  | 0.001724645 | 1.97E-06 | 0.02684347  | 0.001460529 | 0.219089626 |
| 0.939330427 | 0.03568  | 0.001612083 | 0.01142  | 0.002668743 | 0.13025711  | 0.039486814 |
| 2.62E-07    | 0.21736  | 0.440411263 | 0.00951  | 0.673322848 | 0.206683665 | 3.11E-05    |
| 0.00050994  | 0.25565  | 0.211737651 | 0.23793  | 0.926759215 | 0.7926725   | 0.030127204 |
| 0.33933735  | 0.76801  | 0.80229173  | 0.67208  | 0.244013082 | 0.204671511 | 1.50E-15    |
| 0.012395969 | 0.00041  | 0.002172215 | 0.00444  | 0.266543214 | 0.000372608 | 1.73E-07    |
| 0.001509623 | 0.17343  | 0.025714648 | 0.00021  | 0.003463447 | 0.000137678 | 0.001730114 |
| 3.44E-07    | 1.16E-10 | 4.06E-10    | 5.97E-12 | 2.60E-05    | 1.54E-06    | 0.591377997 |
| 0.536262731 | 0.11474  | 0.136433048 | 0.09183  | 0.021825312 | 0.007972299 | 0.037444203 |
| 0.38110486  | 0.27645  | 0.187221071 | 0.88146  | 0.962134392 | 0.944978198 | 0.597143631 |
| 0.037386081 | 0.36099  | 0.016910809 | 0.00495  | 0.030578825 | 0.686681832 | 2.83E-13    |
| 1.41E-05    | 2.87E-06 | 0.177699473 | 0.2663   | 0.00522675  | 0.569332756 | 0.001195116 |
| 1.39E-05    | 0.06147  | 0.002049544 | 1.87E-06 | 0.014601023 | 0.847381446 | 1.68E-08    |
| 0.051508324 | 0.27149  | 0.005137345 | 0.03375  | 0.000142467 | 0.030060097 | 2.89E-08    |
| 0.008044335 | 0.13946  | 0.004953802 | 2.29E-05 | 5.57E-05    | 2.99E-05    | 0.170726763 |
| 0.133713747 | 0.30468  | 0.057206576 | 0.68403  | 0.382922282 | 0.146302387 | 0.001349658 |
| 0.026846604 | 0.24927  | 0.019371625 | 0.00672  | 0.00528348  | 0.018302632 | 0.164581279 |
| 0.112233739 | 0.13074  | 0.033045053 | 0.00816  | 0.002085063 | 0.000330846 | 0.995772699 |
| 0.832648727 | 0.06     | 0.373595352 | 0.65148  | 0.641569324 | 0.044441941 | 1.01E-05    |
| 2.74E-08    | 0.36211  | 0.955796658 | 0.00102  | 0.154147882 | 0.189988583 | 0.130692137 |
| 0.027898044 | 0.0324   | 0.017978246 | 0.00057  | 0.000310459 | 0.004983774 | 0.35046079  |
| 4.83E-10    | 0.05292  | 0.001971814 | 0.83866  | 3.89E-05    | 0.001237783 | 2.79E-06    |
| 7.83E-05    | 8.56E-06 | 0.049242638 | 0.09715  | 0.635678595 | 0.262040426 | 0.468710606 |
| 1.73E-05    | 0.39464  | 0.004773072 | 1.18E-06 | 1.56E-05    | 0.000349976 | 0.531769417 |
| 0.994772905 | 1.62E-05 | 0.005724028 | 0.71539  | 0.26635834  | 0.967199294 | 0.003851007 |
| 0.000183536 | 0.05226  | 0.379414763 | 0.04102  | 0.29077005  | 0.26269956  | 0.009927215 |
| 2.96E-06    | 0.01309  | 0.003038811 | 2.55E-07 | 0.124799289 | 0.036850789 | 0.968254435 |

|             |         |             |         |             |             |             |
|-------------|---------|-------------|---------|-------------|-------------|-------------|
| 6.85E-05    | 0.19453 | 0.273497394 | 0.00196 | 0.65132142  | 0.290622512 | 0.000717278 |
| 0.000225537 | 0.01736 | 0.082313069 | 0.00063 | 0.741876448 | 0.008520462 | 9.87E-06    |
| 3.34E-06    | 0.26131 | 0.101320944 | 0.0009  | 0.313024641 | 0.074345988 | 0.046723488 |
| 0.000762652 | 0.39941 | 0.098658226 | 0.00041 | 0.031150326 | 0.041875954 | 0.84561899  |
| 9.92E-05    | 0.0008  | 2.19E-06    | 0.18153 | 1.77E-09    | 8.57E-06    | 1.33E-11    |



| p.MMdarkred | p.MMgreenye | p.MMdarl | p.MMdarkslat | p.MMdarl | p.MMyellowg | p.MMt看   |
|-------------|-------------|----------|--------------|----------|-------------|----------|
| 1.92E-05    | 3.87E-06    | 0.05325  | 7.59E-07     | 0.38431  | 0.195845144 | 5.57E-07 |
| 3.93E-10    | 0.000829943 | 0.05553  | 0.697087885  | 0.00015  | 0.173774344 | 1.15E-20 |
| 0.007484447 | 0.495101541 | 0.00847  | 7.48E-06     | 0.27471  | 0.007286458 | 1.12E-07 |
| 7.34E-14    | 0.082844751 | 0.54783  | 0.007393797  | 0.44114  | 0.064827576 | 0.03231  |
| 4.03E-23    | 0.000421987 | 0.07313  | 0.128132988  | 3.10E-10 | 0.010193755 | 0.00138  |
| 2.75E-16    | 0.326244279 | 0.01267  | 0.346499501  | 4.76E-05 | 0.934010458 | 2.09E-11 |
| 0.133265505 | 0.01121949  | 0.15399  | 7.17E-06     | 0.04825  | 0.5408052   | 0.04745  |
| 0.003356229 | 7.59E-09    | 0.00033  | 2.74E-10     | 4.56E-05 | 3.14E-07    | 2.94E-13 |
| 1.78E-09    | 0.006666909 | 0.37871  | 2.98E-07     | 0.86095  | 0.006411892 | 0.85158  |
| 6.87E-21    | 0.677678061 | 0.3834   | 0.004052989  | 5.78E-06 | 0.003787095 | 0.00093  |
| 9.01E-12    | 0.709782149 | 0.75226  | 2.84E-06     | 0.10531  | 0.046171567 | 0.02734  |
| 3.31E-05    | 0.025685136 | 0.03014  | 2.39E-11     | 0.18348  | 0.869228782 | 0.04147  |
| 2.57E-17    | 0.675288103 | 0.13978  | 1.78E-05     | 3.11E-05 | 0.00050711  | 0.00712  |
| 6.31E-11    | 0.61375459  | 0.91696  | 0.000951916  | 0.00535  | 0.242040922 | 0.02475  |
| 1.32E-16    | 0.001012574 | 0.19484  | 0.005297183  | 4.76E-06 | 0.02965686  | 0.05832  |
| 3.09E-07    | 0.727998906 | 0.5062   | 0.004716851  | 0.89145  | 0.224294494 | 0.00054  |
| 8.51E-20    | 0.432809858 | 0.84073  | 0.052483176  | 2.37E-09 | 0.002434565 | 0.00024  |
| 2.98E-08    | 0.403010801 | 0.11195  | 3.41E-05     | 0.19718  | 0.817203442 | 0.0001   |
| 6.19E-38    | 0.691663042 | 0.13882  | 0.001333425  | 1.48E-05 | 0.013513035 | 0.00746  |
| 5.17E-19    | 0.000286113 | 0.08411  | 0.704059043  | 6.22E-14 | 2.00E-08    | 0.97871  |
| 8.78E-10    | 0.84497151  | 0.11071  | 0.959248673  | 0.02745  | 0.350651075 | 1.43E-05 |
| 2.87E-07    | 0.017663392 | 0.2283   | 0.352998714  | 0.00019  | 0.160051481 | 0.00391  |
| 2.11E-21    | 0.278397193 | 0.21978  | 5.71E-07     | 0.00055  | 0.219843666 | 0.00232  |
| 3.25E-07    | 0.152472496 | 0.52645  | 0.057251218  | 0.00754  | 0.000768382 | 0.7219   |
| 1.36E-10    | 0.968048116 | 0.89845  | 0.000681846  | 0.00051  | 0.007306495 | 0.00049  |
| 1.03E-06    | 0.010424147 | 0.00941  | 1.10E-08     | 0.17918  | 0.891485591 | 1.81E-08 |
| 2.92E-11    | 0.058834839 | 0.57335  | 7.70E-07     | 0.97966  | 0.050946207 | 6.69E-05 |
| 1.19E-06    | 0.355096142 | 0.12241  | 3.61E-08     | 0.46688  | 0.735515348 | 1.68E-06 |
| 6.16E-12    | 0.605391728 | 0.18782  | 0.001673479  | 0.01321  | 0.345452108 | 6.88E-10 |
| 1.37E-10    | 0.206781341 | 0.33799  | 0.010361757  | 2.34E-10 | 1.40E-16    | 0.38066  |
| 1.64E-18    | 0.002085133 | 0.20086  | 6.35E-06     | 0.72035  | 0.154830689 | 2.32E-05 |
| 0.000530543 | 2.75E-07    | 0.00108  | 2.27E-16     | 0.87472  | 0.024933387 | 0.22952  |
| 2.41E-16    | 0.070927586 | 0.1071   | 7.08E-09     | 0.23132  | 0.003014011 | 0.89466  |
| 1.02E-07    | 0.000219718 | 0.05275  | 7.76E-08     | 9.25E-05 | 4.36E-05    | 0.01894  |
| 2.30E-09    | 0.021282527 | 0.84135  | 0.170093591  | 0.00243  | 0.019105505 | 0.55837  |
| 2.08E-17    | 0.047136909 | 0.0041   | 0.352070126  | 4.48E-10 | 3.59E-05    | 0.05315  |
| 0.003703769 | 0.185182947 | 0.90664  | 0.18471387   | 0.8434   | 0.145598422 | 0.00015  |
| 2.80E-19    | 0.103115076 | 0.04434  | 0.222032014  | 0.00303  | 0.011360539 | 0.73634  |
| 7.91E-19    | 0.010917965 | 0.1952   | 0.097685795  | 0.00015  | 0.004154726 | 0.91147  |
| 5.51E-18    | 4.95E-06    | 0.07597  | 0.979773873  | 0.00107  | 0.07548832  | 5.84E-06 |
| 3.34E-20    | 0.104732628 | 0.03186  | 0.022231296  | 1.64E-10 | 9.41E-06    | 0.01553  |
| 1.20E-16    | 0.151676417 | 0.59088  | 0.001501585  | 0.014    | 0.453323342 | 0.21498  |
| 1.54E-07    | 1.58E-05    | 0.00095  | 5.97E-13     | 0.00128  | 2.57E-08    | 0.8391   |
| 1.23E-18    | 0.000525173 | 0.55142  | 0.000803305  | 7.46E-05 | 0.009937588 | 2.11E-07 |

|             |             |          |             |          |             |          |
|-------------|-------------|----------|-------------|----------|-------------|----------|
| 2.84E-13    | 0.169313017 | 0.28121  | 0.007473976 | 0.00233  | 0.014831256 | 0.99562  |
| 5.25E-29    | 4.30E-06    | 7.02E-08 | 0.339928251 | 7.23E-07 | 0.358687881 | 0.01394  |
| 1.11E-06    | 0.256137318 | 0.55528  | 5.16E-05    | 0.3468   | 0.820342326 | 0.38205  |
| 1.01E-11    | 0.052750337 | 0.00755  | 0.511410887 | 0.01898  | 0.149977695 | 9.35E-08 |
| 1.22E-23    | 0.908101553 | 0.08044  | 0.200656556 | 6.50E-08 | 0.010399517 | 0.00112  |
| 0.423772087 | 0.002570655 | 0.09529  | 1.61E-05    | 0.00013  | 2.45E-05    | 4.58E-06 |
| 2.73E-16    | 0.005571681 | 0.00079  | 0.846362197 | 0.00114  | 0.458482544 | 0.04529  |
| 3.32E-18    | 0.00010413  | 0.00161  | 0.751515379 | 6.41E-07 | 7.30E-08    | 0.02775  |
| 1.16E-12    | 0.867099119 | 0.94297  | 0.000153737 | 0.22219  | 0.199635891 | 0.12622  |
| 2.37E-19    | 0.029624974 | 0.53515  | 0.000296615 | 0.00223  | 0.031474599 | 0.08196  |
| 8.55E-17    | 0.149534706 | 0.04319  | 0.306174625 | 0.00022  | 0.000135201 | 0.50886  |
| 3.71E-24    | 0.000226203 | 0.00088  | 0.916366249 | 5.55E-09 | 8.52E-05    | 0.71858  |
| 6.42E-24    | 0.002932019 | 0.25308  | 0.286425859 | 2.27E-09 | 8.50E-09    | 0.01706  |
| 3.08E-20    | 0.088410896 | 0.06287  | 0.000745237 | 0.01069  | 0.961126368 | 6.17E-05 |
| 0.119490384 | 0.573223139 | 0.88727  | 0.015796529 | 0.77736  | 0.033429599 | 0.87025  |
| 5.79E-07    | 0.29953728  | 0.16408  | 2.49E-06    | 0.03904  | 1.66E-05    | 0.12558  |
| 5.19E-19    | 0.503907022 | 0.38748  | 0.000653826 | 9.58E-06 | 0.00043839  | 0.17546  |
| 2.58E-11    | 0.080215639 | 0.04924  | 0.340370214 | 0.11057  | 0.003416078 | 1.43E-10 |
| 3.48E-14    | 0.002153802 | 8.45E-07 | 0.118135881 | 1.95E-05 | 0.316542033 | 8.18E-08 |
| 3.10E-05    | 0.346529932 | 0.30436  | 8.62E-05    | 0.09956  | 0.074491534 | 0.00202  |
| 7.57E-19    | 0.638342793 | 0.00975  | 0.017692657 | 0.03467  | 0.002218458 | 0.0763   |
| 4.03E-20    | 0.820699136 | 0.00529  | 1.13E-07    | 0.1131   | 0.520180459 | 0.03955  |
| 0.006880354 | 0.00755389  | 0.0239   | 1.06E-08    | 0.60341  | 0.56739537  | 1.24E-05 |
| 4.56E-11    | 1.75E-05    | 5.11E-08 | 1.73E-26    | 0.95276  | 0.336034495 | 0.25535  |
| 0.006801869 | 3.72E-06    | 0.00027  | 5.10E-14    | 0.00402  | 0.00114902  | 1.30E-07 |
| 3.39E-06    | 0.029138608 | 0.22897  | 0.000136619 | 0.24011  | 0.952621971 | 0.00016  |
| 0.019972808 | 0.012885586 | 0.11912  | 0.841292658 | 0.23016  | 0.94270847  | 0.00047  |
| 4.51E-06    | 0.006371629 | 0.34228  | 1.43E-07    | 0.36814  | 0.485856828 | 5.31E-05 |
| 1.48E-11    | 0.322707135 | 0.6987   | 0.020783221 | 0.9585   | 0.014873029 | 4.34E-06 |
| 4.72E-22    | 0.675174959 | 0.85733  | 0.000652737 | 0.06154  | 0.394315848 | 0.00019  |
| 0.000129734 | 0.61087741  | 0.85635  | 3.78E-06    | 0.33419  | 0.368105555 | 0.91488  |
| 3.34E-10    | 0.620565628 | 0.43351  | 0.000225658 | 0.2183   | 0.607770109 | 0.04461  |
| 6.34E-12    | 0.636522592 | 0.06271  | 0.001995464 | 0.01636  | 0.921914422 | 1.32E-10 |
| 4.13E-21    | 0.933289073 | 0.2729   | 0.000344646 | 0.06092  | 0.962068888 | 1.13E-05 |
| 4.67E-13    | 0.176737683 | 0.76234  | 8.86E-07    | 0.88112  | 0.399416134 | 0.01717  |
| 0.081853    | 8.65E-05    | 0.44794  | 0.779210992 | 0.58076  | 0.005304302 | 3.51E-15 |
| 6.16E-05    | 0.014887333 | 0.03914  | 2.99E-07    | 0.54197  | 0.590214467 | 3.23E-06 |
| 1.02E-18    | 0.124513092 | 0.18407  | 5.14E-06    | 0.01346  | 0.117225407 | 0.35673  |
| 3.55E-08    | 0.03771196  | 0.00973  | 0.772330639 | 0.09554  | 0.0431043   | 8.12E-05 |
| 3.65E-49    | 0.486337543 | 0.06168  | 0.004767051 | 2.15E-14 | 8.89E-10    | 0.8387   |
| 1.22E-19    | 0.001916254 | 0.02455  | 0.315952456 | 7.79E-09 | 2.93E-09    | 0.01742  |
| 1.54E-11    | 0.001537432 | 7.94E-07 | 0.865609807 | 8.68E-07 | 0.255047929 | 8.04E-09 |
| 1.07E-09    | 0.080677272 | 0.2517   | 4.30E-08    | 0.47855  | 0.90038887  | 4.07E-07 |
| 1.71E-06    | 0.001316276 | 0.01237  | 0.483748356 | 0.00311  | 0.290452474 | 0.214    |
| 0.600649075 | 1.53E-08    | 0.00224  | 0.000230126 | 0.03308  | 0.000341008 | 9.07E-11 |

|             |             |          |             |          |             |          |
|-------------|-------------|----------|-------------|----------|-------------|----------|
| 9.03E-06    | 6.40E-07    | 0.0053   | 1.01E-06    | 0.99256  | 0.045483965 | 2.67E-16 |
| 1.31E-13    | 0.564928065 | 0.3384   | 0.170875159 | 7.59E-05 | 0.004450551 | 0.27895  |
| 2.96E-12    | 0.007643137 | 0.00011  | 8.92E-09    | 0.88176  | 0.449269954 | 0.0258   |
| 3.87E-31    | 1.59E-05    | 3.81E-08 | 0.158067309 | 1.72E-06 | 0.745583116 | 0.00086  |
| 1.24E-16    | 0.197638447 | 0.00111  | 8.96E-10    | 0.00021  | 0.038907513 | 1.68E-06 |
| 1.38E-19    | 0.315154416 | 0.00102  | 0.03941563  | 2.30E-07 | 6.90E-08    | 0.10123  |
| 0.017700393 | 0.162469547 | 0.09446  | 3.62E-05    | 0.07481  | 0.580715069 | 0.0733   |
| 5.35E-13    | 0.03426567  | 0.00102  | 0.90667069  | 0.00099  | 0.444777255 | 0.03348  |
| 0.08477827  | 0.101524581 | 0.18459  | 0.000138941 | 0.29032  | 0.304864769 | 2.31E-06 |
| 9.25E-10    | 0.000161024 | 0.014    | 4.29E-14    | 0.8313   | 0.352119557 | 2.67E-05 |
| 8.53E-18    | 0.179309529 | 0.04401  | 0.119709424 | 0.00328  | 1.14E-06    | 0.00074  |
| 1.07E-07    | 0.436025137 | 0.09191  | 7.47E-07    | 0.07244  | 0.021166944 | 0.0932   |
| 4.07E-19    | 0.043264803 | 0.60713  | 6.09E-08    | 0.80588  | 0.042022285 | 0.00302  |
| 3.10E-08    | 0.018615122 | 0.04238  | 2.11E-05    | 0.73207  | 0.466728541 | 0.00364  |
| 0.001246995 | 0.353787607 | 0.43704  | 0.000220147 | 0.0004   | 2.32E-06    | 0.02217  |
| 0.001513585 | 0.000153322 | 0.00011  | 1.81E-16    | 0.10199  | 0.313669754 | 8.65E-10 |
| 2.12E-23    | 0.354216309 | 0.73992  | 0.000191771 | 1.90E-05 | 1.43E-05    | 0.13181  |
| 0.000112492 | 0.842946164 | 0.03014  | 1.10E-05    | 0.14117  | 0.007480735 | 1.87E-07 |
| 0.000291875 | 0.179140525 | 0.58882  | 0.006997802 | 0.50115  | 0.198467674 | 6.77E-05 |
| 1.11E-23    | 0.000419398 | 0.21947  | 0.895822342 | 6.95E-06 | 0.003836515 | 0.76845  |
| 6.01E-11    | 0.474648048 | 0.85603  | 0.002626577 | 0.04539  | 0.946977739 | 7.45E-05 |
| 1.33E-16    | 0.083674236 | 0.2238   | 1.88E-05    | 0.00044  | 0.378803208 | 2.91E-07 |
| 3.96E-09    | 0.732840156 | 0.06153  | 0.077197195 | 0.07012  | 0.122733181 | 0.98858  |
| 1.89E-08    | 0.889866596 | 0.85022  | 7.63E-06    | 0.81608  | 0.507036161 | 0.61025  |
| 4.28E-16    | 0.066032042 | 0.17189  | 7.76E-09    | 0.35472  | 0.431478431 | 0.00042  |
| 0.041821302 | 0.053792979 | 0.0009   | 1.58E-05    | 0.41029  | 0.94323877  | 0.06758  |
| 2.67E-14    | 0.005573873 | 0.02173  | 1.98E-09    | 0.0078   | 0.000412427 | 0.36033  |
| 9.34E-18    | 0.771310803 | 0.73189  | 0.005147455 | 0.15756  | 0.794233646 | 0.02115  |
| 1.66E-21    | 0.691943537 | 0.99076  | 0.000543024 | 0.00071  | 0.00110651  | 0.03846  |
| 3.30E-19    | 1.15E-08    | 0.00052  | 0.640422457 | 0.00011  | 0.006399908 | 0.00134  |
| 1.85E-14    | 0.000689504 | 1.92E-05 | 0.645634223 | 1.86E-10 | 4.01E-18    | 4.45E-07 |
| 2.32E-31    | 9.29E-05    | 0.11657  | 0.217695149 | 7.69E-13 | 5.65E-07    | 0.87036  |
| 2.38E-10    | 9.65E-05    | 0.05826  | 7.00E-09    | 0.56431  | 0.665758021 | 2.15E-05 |
| 2.21E-23    | 0.385262758 | 0.01424  | 2.04E-06    | 0.00031  | 0.236539404 | 0.00267  |
| 0.00019374  | 0.108390288 | 0.16936  | 4.77E-05    | 0.50372  | 0.29476077  | 0.018    |
| 4.39E-05    | 0.004241511 | 0.00339  | 1.75E-07    | 0.89425  | 0.670696745 | 0.02388  |
| 8.53E-28    | 0.354181178 | 0.19606  | 5.35E-06    | 9.32E-05 | 1.48E-06    | 0.00096  |
| 1.37E-06    | 0.354839567 | 0.07679  | 0.001018122 | 5.01E-05 | 0.18208177  | 9.39E-14 |
| 0.001697895 | 0.19372065  | 0.07318  | 9.27E-08    | 0.56643  | 0.228532184 | 0.02671  |
| 1.52E-14    | 0.084692398 | 0.01308  | 0.643014687 | 0.00527  | 0.022731026 | 6.63E-10 |
| 5.33E-05    | 0.172222249 | 0.33638  | 0.077715186 | 0.12849  | 0.093518316 | 1.84E-21 |
| 1.03E-08    | 0.065506316 | 0.09954  | 2.60E-10    | 0.55673  | 0.200774368 | 2.87E-08 |
| 2.86E-09    | 6.74E-06    | 0.00831  | 2.35E-08    | 0.55211  | 0.021452511 | 7.12E-09 |
| 2.68E-12    | 0.550040405 | 0.82917  | 0.243132508 | 0.00571  | 0.29047254  | 0.12455  |
| 0.787391666 | 0.876694678 | 0.53112  | 0.058066538 | 0.1131   | 0.004943794 | 3.08E-05 |

|           |             |          |             |          |             |          |
|-----------|-------------|----------|-------------|----------|-------------|----------|
| 1.01E-10  | 0.011312758 | 0.02449  | 8.55E-10    | 0.21982  | 0.000365399 | 1.53E-05 |
| 0.0008317 | 0.529964699 | 0.89921  | 0.021579608 | 0.01893  | 3.84E-05    | 0.1096   |
| 2.84E-15  | 0.877230905 | 0.39216  | 0.001172167 | 0.01393  | 0.251958284 | 2.81E-05 |
| 1.20E-07  | 0.005315949 | 0.02326  | 1.60E-05    | 0.53569  | 0.454858436 | 8.28E-06 |
| 8.33E-11  | 0.000428064 | 2.84E-08 | 0.037214625 | 5.63E-05 | 0.393630684 | 1.44E-06 |

| p.MMlightyel | p.MMorange  | p.MMplum1   | p.MMroyalblu | p.MMsienp | p.MMivory   | p.MMflor |
|--------------|-------------|-------------|--------------|-----------|-------------|----------|
| 0.745500748  | 3.82E-06    | 0.027552234 | 0.000123701  | 0.22928   | 0.054618932 | 0.73582  |
| 0.004129508  | 1.32E-08    | 0.001974062 | 2.09E-06     | 0.44325   | 0.744863166 | 1.89E-06 |
| 1.09E-08     | 9.21E-05    | 6.30E-05    | 4.28E-16     | 0.00978   | 0.003248847 | 0.97729  |
| 0.586815035  | 0.040299261 | 0.006401235 | 7.23E-09     | 0.00114   | 3.38E-05    | 0.00292  |
| 0.166505943  | 0.08763082  | 0.111821475 | 0.000195588  | 0.01052   | 0.000237547 | 0.26018  |
| 0.266148691  | 0.314825471 | 0.000532265 | 2.71E-09     | 0.03443   | 0.003038575 | 0.1535   |
| 0.000272467  | 0.00042717  | 0.001287671 | 1.59E-07     | 0.00414   | 0.267560833 | 0.15425  |
| 1.85E-05     | 3.05E-10    | 1.04E-06    | 2.20E-13     | 0.34234   | 0.010906435 | 0.26757  |
| 0.646883597  | 0.643070477 | 7.52E-06    | 2.75E-12     | 3.68E-05  | 0.012358882 | 0.03344  |
| 0.685767004  | 0.489432264 | 0.003258271 | 1.20E-07     | 0.0008    | 1.00E-06    | 0.08343  |
| 0.193287501  | 0.233799592 | 0.003458758 | 9.53E-13     | 0.52541   | 0.001410166 | 0.3066   |
| 0.001103139  | 0.009010599 | 0.000114473 | 2.15E-16     | 0.0049    | 0.003236087 | 0.91863  |
| 0.920341911  | 0.592762939 | 0.049634385 | 6.33E-07     | 0.03715   | 0.041122636 | 0.8812   |
| 0.474843267  | 0.624415873 | 0.221263967 | 0.002732068  | 0.00283   | 1.14E-05    | 0.03108  |
| 0.054600047  | 0.02484766  | 0.711055513 | 0.001056527  | 0.21674   | 0.000937997 | 0.43567  |
| 0.006475066  | 0.331379308 | 8.94E-05    | 2.47E-14     | 0.06004   | 0.058057939 | 0.26394  |
| 0.865589054  | 0.723016093 | 0.002369334 | 2.59E-07     | 0.08022   | 0.010819945 | 0.60774  |
| 0.006942052  | 0.109783439 | 1.01E-05    | 7.22E-15     | 0.73272   | 0.117873353 | 0.94255  |
| 0.083021583  | 0.087990147 | 0.004351232 | 7.40E-10     | 0.00215   | 0.000199125 | 0.69411  |
| 0.002846025  | 0.002461617 | 0.003898583 | 0.350227642  | 0.0124    | 0.097871323 | 0.55315  |
| 0.447063859  | 0.887503332 | 0.000744646 | 3.78E-06     | 0.01832   | 0.822847711 | 0.04309  |
| 0.813164194  | 0.585645173 | 0.538160908 | 0.003953147  | 0.0119    | 0.256006942 | 0.87496  |
| 0.520331589  | 0.721745767 | 0.293012566 | 2.57E-08     | 0.85093   | 0.002204824 | 0.95813  |
| 0.187924232  | 0.651061143 | 0.022306796 | 1.21E-07     | 0.16914   | 0.312826672 | 0.10563  |
| 0.942289872  | 0.203132837 | 0.37945075  | 5.92E-07     | 0.76447   | 0.004721847 | 0.1069   |
| 0.004098536  | 0.00076891  | 1.72E-06    | 4.34E-13     | 1.09E-05  | 0.084205498 | 0.32699  |
| 0.036784545  | 0.910824656 | 2.19E-05    | 5.19E-21     | 0.50274   | 0.00183355  | 0.00591  |
| 0.002040905  | 0.01874583  | 5.12E-06    | 8.35E-17     | 0.00021   | 0.015513143 | 0.56663  |
| 0.000250652  | 0.138764668 | 8.87E-12    | 2.69E-21     | 0.01268   | 0.001644953 | 0.0019   |
| 0.174038287  | 0.926868744 | 0.001435424 | 1.16E-08     | 0.07691   | 0.211853651 | 0.47081  |
| 0.908972146  | 0.565737159 | 0.0013615   | 2.25E-14     | 7.68E-07  | 3.39E-08    | 0.0005   |
| 0.122981338  | 0.062242512 | 0.002245293 | 4.50E-11     | 0.30325   | 0.000759249 | 0.10048  |
| 0.78855246   | 0.899987723 | 0.164263425 | 4.29E-07     | 2.24E-05  | 0.011560695 | 0.44836  |
| 0.322818575  | 0.902109109 | 0.007100188 | 4.94E-11     | 0.16557   | 0.001138989 | 0.00268  |
| 0.744674666  | 0.679639205 | 0.940181702 | 0.023593206  | 0.2223    | 0.04566079  | 0.80106  |
| 0.002095416  | 0.361581729 | 0.317593643 | 0.802405244  | 0.09555   | 0.095951141 | 0.83737  |
| 0.003373783  | 0.095144708 | 2.08E-05    | 1.07E-06     | 0.00187   | 2.46E-05    | 0.05813  |
| 0.003331363  | 0.024186681 | 1.19E-05    | 0.158463194  | 0.02009   | 0.003712077 | 0.08676  |
| 0.008967194  | 0.013565043 | 0.990285224 | 0.083901827  | 0.00333   | 0.006142577 | 0.9973   |
| 0.554289855  | 0.507588143 | 0.022080248 | 5.49E-07     | 0.1876    | 0.028540935 | 0.52556  |
| 0.305338236  | 0.40527897  | 0.827690437 | 1.56E-05     | 0.00304   | 0.001004828 | 0.14229  |
| 0.556666674  | 0.001455443 | 0.000174267 | 3.14E-16     | 0.00302   | 0.000223261 | 0.00627  |
| 0.418950837  | 0.922691673 | 0.091257995 | 3.83E-10     | 0.00084   | 9.38E-05    | 0.03736  |
| 0.104016159  | 0.145619128 | 0.056939869 | 0.000669208  | 9.27E-05  | 0.015809242 | 0.02609  |

|             |             |             |             |          |             |          |
|-------------|-------------|-------------|-------------|----------|-------------|----------|
| 0.138022924 | 0.286705248 | 0.153149967 | 0.00069801  | 0.04361  | 0.069213772 | 0.54511  |
| 0.015345439 | 0.000236568 | 0.973644273 | 0.003427361 | 9.21E-05 | 0.004448664 | 0.29761  |
| 0.034246177 | 0.536778258 | 0.000333825 | 2.09E-09    | 0.00605  | 0.099715256 | 0.59002  |
| 0.046666228 | 0.726572022 | 0.001415443 | 2.27E-10    | 0.02766  | 0.029348946 | 0.00685  |
| 0.035501747 | 0.189831649 | 0.667058487 | 0.000127121 | 0.37027  | 0.074166959 | 0.85852  |
| 4.03E-07    | 0.000397283 | 2.99E-05    | 1.24E-14    | 0.00092  | 0.009787747 | 0.00107  |
| 0.104142835 | 0.002060049 | 0.675650897 | 4.61E-05    | 0.00659  | 0.441741317 | 0.24575  |
| 0.007007367 | 0.000137084 | 0.63892685  | 0.074809054 | 0.01578  | 0.059498151 | 0.87684  |
| 0.33706199  | 0.420208393 | 8.47E-05    | 1.42E-14    | 0.0097   | 0.008095122 | 0.03569  |
| 0.030654372 | 0.16843133  | 0.114117605 | 9.91E-08    | 0.00155  | 0.190718823 | 0.0436   |
| 0.004506849 | 0.010244766 | 0.229836347 | 0.208907394 | 0.02953  | 0.001019791 | 0.83399  |
| 1.38E-06    | 0.000627207 | 0.006568262 | 0.755709375 | 0.18328  | 0.123931153 | 0.17172  |
| 9.49E-05    | 0.007666811 | 0.001891319 | 0.847234655 | 0.00878  | 0.643851305 | 6.39E-07 |
| 0.900574261 | 0.536945491 | 0.00076478  | 1.60E-07    | 0.05171  | 0.018357042 | 0.16127  |
| 0.017149552 | 0.130641963 | 0.155209556 | 4.29E-05    | 0.03515  | 0.467551873 | 0.4493   |
| 0.275740266 | 0.95678726  | 0.079991062 | 1.89E-11    | 0.45367  | 0.046849349 | 0.00354  |
| 0.748311398 | 0.545952808 | 0.311126255 | 3.32E-08    | 0.02168  | 0.02624151  | 0.82588  |
| 0.054118486 | 0.813965812 | 0.000976128 | 6.89E-11    | 0.01793  | 0.317719174 | 0.18265  |
| 0.062643341 | 0.074010826 | 0.417910704 | 0.042891041 | 0.01086  | 0.011517319 | 0.00439  |
| 0.008441631 | 0.019048783 | 0.004132966 | 1.61E-12    | 0.69028  | 0.399797741 | 0.86537  |
| 1.03E-05    | 2.43E-07    | 0.328456803 | 0.002383291 | 0.75229  | 0.061725637 | 0.00827  |
| 0.612703036 | 0.611950151 | 0.037604873 | 5.62E-10    | 0.00071  | 0.005672916 | 0.00608  |
| 2.52E-06    | 1.89E-07    | 4.11E-05    | 7.86E-12    | 2.60E-06 | 7.59E-05    | 0.70617  |
| 0.453368183 | 0.711265231 | 0.000141734 | 4.30E-20    | 0.08475  | 0.002212218 | 0.98921  |
| 7.32E-09    | 0.001690934 | 3.68E-10    | 1.65E-27    | 0.78724  | 0.000475427 | 0.00215  |
| 0.214339964 | 0.040445011 | 0.028404377 | 1.22E-09    | 0.00073  | 0.001414971 | 0.24881  |
| 9.70E-06    | 0.028143995 | 5.75E-06    | 2.95E-09    | 0.51928  | 0.85081804  | 0.73391  |
| 0.001143743 | 0.070841581 | 2.73E-06    | 6.92E-22    | 0.93902  | 0.005730926 | 0.26142  |
| 0.003481096 | 0.822626962 | 1.16E-07    | 9.09E-19    | 0.00494  | 0.003901496 | 0.01523  |
| 0.504059381 | 0.167806299 | 7.62E-05    | 6.40E-16    | 0.00811  | 0.000221137 | 0.02296  |
| 0.003552679 | 0.960309557 | 4.40E-06    | 6.45E-14    | 0.02982  | 0.000141729 | 0.96011  |
| 0.172618401 | 0.765816904 | 0.009461762 | 2.91E-11    | 0.21361  | 0.039598559 | 0.96831  |
| 0.091832849 | 0.056278007 | 1.12E-06    | 8.36E-16    | 0.00082  | 0.019249077 | 0.06923  |
| 0.11677378  | 0.416384737 | 0.000127126 | 2.07E-18    | 0.00379  | 0.000991444 | 0.4245   |
| 0.334897974 | 0.12486099  | 0.000252611 | 2.46E-19    | 0.14545  | 0.026808608 | 0.00172  |
| 2.44E-10    | 8.12E-08    | 2.56E-10    | 1.82E-12    | 0.09657  | 0.077835994 | 0.09509  |
| 5.83E-07    | 0.000307025 | 3.65E-09    | 5.34E-23    | 0.06621  | 0.017241058 | 0.23407  |
| 0.879264723 | 0.197607968 | 0.008967738 | 6.19E-08    | 0.00909  | 9.21E-07    | 0.03732  |
| 0.723007589 | 0.270588368 | 0.012303928 | 1.50E-06    | 0.54317  | 0.213915331 | 0.00028  |
| 1.79E-08    | 3.72E-06    | 0.031982367 | 0.096940902 | 7.68E-05 | 5.97E-06    | 0.03285  |
| 7.24E-07    | 0.00054649  | 0.002771903 | 0.683533911 | 0.0048   | 0.497797644 | 0.00084  |
| 0.776163921 | 0.221556217 | 0.584570818 | 0.002170208 | 0.1706   | 0.023020786 | 0.56809  |
| 1.75E-06    | 0.002974716 | 1.08E-12    | 3.08E-27    | 0.00074  | 2.82E-05    | 0.67476  |
| 0.879588251 | 0.049631625 | 0.286433278 | 0.002473971 | 0.14719  | 0.250698989 | 0.24394  |
| 2.97E-05    | 1.07E-08    | 9.25E-09    | 4.46E-08    | 0.20985  | 0.142262679 | 0.48527  |

|             |             |             |             |          |             |          |
|-------------|-------------|-------------|-------------|----------|-------------|----------|
| 2.84E-06    | 6.97E-08    | 2.64E-13    | 6.20E-19    | 0.0769   | 0.002277963 | 0.48715  |
| 0.201786055 | 0.192841553 | 0.243708789 | 0.001523766 | 0.063    | 0.992537817 | 0.82012  |
| 0.95042798  | 0.264836354 | 0.1172481   | 9.65E-07    | 0.54126  | 0.00557725  | 0.39043  |
| 0.003516947 | 1.79E-05    | 0.824885969 | 0.001239853 | 0.00334  | 0.080920962 | 0.04359  |
| 0.002629761 | 0.023279747 | 3.53E-06    | 1.53E-18    | 0.00324  | 0.001043602 | 0.9897   |
| 5.77E-06    | 0.006904517 | 0.102669567 | 0.294482302 | 0.03869  | 0.2863062   | 0.07113  |
| 3.92E-05    | 0.007567037 | 0.000939605 | 1.83E-10    | 9.14E-05 | 0.063437171 | 0.13575  |
| 0.005336349 | 0.646123785 | 0.433049973 | 0.246598969 | 0.07066  | 0.185920574 | 1.29E-06 |
| 0.000142577 | 1.26E-06    | 0.000692293 | 9.60E-07    | 0.24324  | 0.260057352 | 0.3563   |
| 0.000383563 | 0.001501897 | 1.07E-06    | 6.89E-25    | 0.04493  | 6.62E-06    | 0.21268  |
| 1.13E-05    | 4.39E-05    | 0.048018474 | 0.284080987 | 0.16124  | 0.017805824 | 0.51984  |
| 0.024384809 | 0.06131889  | 0.008560525 | 2.29E-10    | 0.05745  | 0.001632875 | 0.03858  |
| 0.542677479 | 0.054392194 | 0.003162042 | 1.14E-14    | 1.55E-06 | 0.04161306  | 0.09908  |
| 0.021695986 | 0.261461833 | 0.000450546 | 5.92E-13    | 0.08719  | 0.020902444 | 0.98552  |
| 0.010207526 | 0.270051139 | 0.000246142 | 1.13E-06    | 3.24E-05 | 0.003931033 | 0.00107  |
| 5.35E-11    | 1.40E-12    | 1.84E-11    | 1.21E-25    | 0.00011  | 0.001020988 | 0.91692  |
| 0.001089227 | 0.003870945 | 0.513512887 | 0.020955477 | 0.01157  | 1.38E-06    | 0.47932  |
| 3.50E-09    | 0.003814107 | 2.26E-12    | 6.71E-26    | 0.65545  | 0.005191311 | 0.12772  |
| 3.76E-05    | 0.073286136 | 2.18E-06    | 2.46E-19    | 0.08502  | 0.117900811 | 0.47029  |
| 0.000647686 | 0.005478346 | 0.616075497 | 0.395906236 | 0.00285  | 3.55E-05    | 0.43607  |
| 0.089128336 | 0.952419455 | 3.79E-05    | 2.78E-14    | 0.00553  | 0.002474303 | 0.00869  |
| 0.177118909 | 0.152753846 | 0.000924755 | 3.29E-12    | 0.18823  | 0.008875844 | 0.27152  |
| 0.260700841 | 0.010147809 | 0.202225586 | 1.30E-06    | 0.70529  | 0.957789848 | 0.01625  |
| 0.73906715  | 0.11656051  | 0.071852987 | 7.46E-11    | 1.16E-05 | 0.695827093 | 0.15985  |
| 0.002759778 | 0.138609204 | 1.27E-08    | 1.18E-24    | 0.00026  | 0.000175749 | 0.5825   |
| 5.36E-06    | 0.042080391 | 1.47E-05    | 1.68E-15    | 0.26312  | 0.230444668 | 0.63398  |
| 0.497572009 | 0.551552111 | 0.033103539 | 1.85E-10    | 0.07393  | 0.01674138  | 0.46052  |
| 0.85617711  | 0.640393721 | 0.044561659 | 0.000196689 | 0.02908  | 0.000521013 | 0.26259  |
| 2.13E-05    | 0.000131978 | 0.507940336 | 0.031341151 | 0.00524  | 0.016966646 | 0.19834  |
| 0.00628817  | 6.61E-06    | 0.301755607 | 0.407831021 | 0.0168   | 0.00899543  | 2.29E-05 |
| 1.16E-09    | 5.49E-07    | 3.73E-07    | 0.020653306 | 0.00786  | 0.287116632 | 0.08158  |
| 0.00051727  | 0.005488311 | 0.848867559 | 0.075559439 | 0.00438  | 0.038717568 | 0.11328  |
| 5.96E-05    | 0.017124219 | 4.61E-12    | 1.81E-29    | 0.08956  | 0.002162938 | 0.47183  |
| 0.429122367 | 0.790147941 | 0.010262565 | 5.79E-07    | 0.03315  | 0.00037789  | 0.03581  |
| 0.010375652 | 0.040019107 | 0.001583767 | 1.30E-11    | 0.34088  | 0.388416425 | 0.51132  |
| 0.01119657  | 0.268945106 | 1.07E-05    | 1.33E-13    | 0.04699  | 0.008484354 | 0.08344  |
| 0.002705666 | 3.07E-05    | 0.827037879 | 1.55E-05    | 0.00324  | 9.18E-05    | 0.0734   |
| 2.13E-05    | 9.93E-10    | 0.000443933 | 2.32E-09    | 0.02399  | 0.004921582 | 0.00031  |
| 0.006169743 | 0.000201894 | 0.245305971 | 4.06E-08    | 0.90928  | 0.000370695 | 0.28612  |
| 0.977537307 | 0.707014053 | 0.000104199 | 1.60E-07    | 0.28238  | 0.521759529 | 0.03128  |
| 1.42E-05    | 4.13E-06    | 8.73E-14    | 6.46E-16    | 0.07628  | 0.620332224 | 0.01725  |
| 7.32E-07    | 1.11E-05    | 1.54E-09    | 2.32E-25    | 0.00493  | 0.000582551 | 0.68786  |
| 0.174312866 | 0.018407192 | 1.07E-06    | 5.49E-13    | 0.00011  | 0.006868345 | 0.0016   |
| 0.704976289 | 0.056963372 | 0.000791925 | 1.71E-07    | 0.08823  | 0.094505236 | 0.02234  |
| 3.89E-06    | 0.019068178 | 3.71E-06    | 3.75E-10    | 0.33091  | 0.145698201 | 0.04272  |

|             |             |             |             |          |             |         |
|-------------|-------------|-------------|-------------|----------|-------------|---------|
| 0.021656381 | 0.501415668 | 2.76E-06    | 9.53E-19    | 0.00648  | 0.000495854 | 0.51324 |
| 0.178178581 | 0.056586059 | 0.01618987  | 2.91E-10    | 2.32E-05 | 0.128457498 | 0.00052 |
| 0.008385986 | 0.250269364 | 2.31E-06    | 2.09E-18    | 0.04401  | 0.012017184 | 0.75322 |
| 0.001434474 | 0.049207499 | 5.78E-07    | 1.90E-15    | 0.42636  | 0.013465455 | 0.04103 |
| 0.189315058 | 0.05081159  | 0.737537122 | 0.026609584 | 0.06469  | 0.063756644 | 0.01094 |



| p.MMpink    | p.MMviol | p.MMwhite   | p.MMcyan    | p.MMred     | p.MMbisque4 | p.MMmedium  |
|-------------|----------|-------------|-------------|-------------|-------------|-------------|
| 0.659220318 | 0.12413  | 0.175656775 | 0.178128643 | 0.02719141  | 9.38E-05    | 0.021393205 |
| 1.64E-06    | 6.12E-07 | 0.00012273  | 1.25E-05    | 2.80E-10    | 0.01674898  | 0.476685831 |
| 0.272745138 | 0.2277   | 0.181003933 | 0.454832703 | 0.857081464 | 0.014379331 | 0.003976296 |
| 0.130822802 | 0.51658  | 0.823478066 | 0.269046446 | 0.387533298 | 0.072266852 | 0.002294731 |
| 0.586511608 | 0.94112  | 0.981308257 | 0.65520249  | 0.269769386 | 0.000794342 | 0.000295869 |
| 0.921508269 | 0.6178   | 0.576324642 | 0.969556859 | 0.945741585 | 0.006517025 | 0.013893768 |
| 0.638580249 | 0.99549  | 0.67464947  | 0.565618132 | 0.006347116 | 1.89E-06    | 0.028685072 |
| 0.626155014 | 0.00315  | 0.081386679 | 0.00822611  | 1.67E-12    | 0.000137874 | 0.176625208 |
| 0.097914659 | 0.00016  | 0.020430338 | 4.96E-05    | 4.96E-10    | 7.08E-05    | 4.93E-06    |
| 0.612652081 | 0.43635  | 0.676347977 | 0.344971065 | 0.016431287 | 0.066402253 | 0.312735746 |
| 0.902044521 | 0.69041  | 0.926111781 | 0.524287162 | 0.174995165 | 8.76E-05    | 0.000302049 |
| 0.334519848 | 0.22793  | 0.594965921 | 0.09502869  | 0.008128533 | 2.00E-10    | 0.012334984 |
| 0.815155772 | 0.87186  | 0.854013752 | 0.40139584  | 0.258301737 | 3.39E-05    | 0.003340647 |
| 0.103435809 | 0.26071  | 0.206785567 | 0.341962793 | 0.189392542 | 3.92E-07    | 0.045682769 |
| 0.334510183 | 0.41861  | 0.476882131 | 0.442772402 | 0.335843098 | 0.017039746 | 0.003935432 |
| 0.524375805 | 0.46131  | 0.677227355 | 0.25742262  | 0.115796986 | 0.045811656 | 0.601594754 |
| 0.738574814 | 0.57663  | 0.616928528 | 0.74758933  | 0.902048803 | 0.080676316 | 0.672302385 |
| 0.460629578 | 0.31615  | 0.278134111 | 0.720338986 | 0.72471494  | 0.077724663 | 0.662178217 |
| 0.143448356 | 0.27285  | 0.292724286 | 0.26546544  | 0.09817409  | 2.33E-05    | 0.600497593 |
| 0.659886506 | 0.36406  | 0.722563138 | 0.281776066 | 0.092444526 | 0.000486899 | 0.932513022 |
| 0.910789077 | 0.90377  | 0.665926048 | 0.626904419 | 0.159559213 | 0.204974778 | 2.48E-07    |
| 0.130302194 | 0.055    | 0.136621408 | 0.154863803 | 0.236455287 | 0.22297049  | 0.679133935 |
| 0.479136509 | 0.67766  | 0.979325949 | 0.728646018 | 0.47052704  | 7.87E-05    | 0.345022554 |
| 0.930934975 | 0.47406  | 0.97923397  | 0.492746673 | 0.268062936 | 0.002997542 | 0.002776368 |
| 0.655913693 | 0.44114  | 0.649979884 | 0.367344633 | 0.19247646  | 0.019651443 | 0.019215695 |
| 0.779862116 | 0.4735   | 0.858430102 | 0.290870638 | 0.009670074 | 0.007608483 | 0.715003965 |
| 0.056523858 | 0.22963  | 0.160066904 | 0.261821429 | 0.033447113 | 0.844646957 | 0.360373164 |
| 0.691546058 | 0.23715  | 0.856418248 | 0.083048889 | 0.116607445 | 0.003316302 | 0.398022936 |
| 0.953376966 | 0.28293  | 0.981236025 | 0.16100011  | 0.035472763 | 0.066540002 | 8.52E-11    |
| 0.781556051 | 0.18086  | 0.82437514  | 0.083909749 | 0.005440609 | 0.000747564 | 1.00E-05    |
| 0.00231726  | 0.0019   | 0.002797856 | 0.013630679 | 0.000103421 | 0.120578979 | 0.520074256 |
| 0.296833155 | 0.03508  | 0.084109555 | 0.074524959 | 7.97E-07    | 0.000123515 | 0.40829228  |
| 0.02184392  | 0.00437  | 0.045717763 | 0.00226074  | 1.37E-06    | 9.80E-13    | 7.38E-09    |
| 0.012451989 | 0.05508  | 0.04412166  | 0.100311966 | 0.000481923 | 0.318074345 | 0.714279316 |
| 0.867182932 | 0.42662  | 0.477343453 | 0.470051261 | 0.742157492 | 9.52E-05    | 0.005919201 |
| 0.638991679 | 0.38931  | 0.952921054 | 0.290909376 | 0.983681924 | 0.001091969 | 0.415898592 |
| 0.864537173 | 0.20566  | 0.943376663 | 0.034413315 | 0.044216993 | 9.44E-06    | 0.237665905 |
| 0.381765786 | 0.68022  | 0.498101272 | 0.911110182 | 0.366355993 | 0.003934479 | 1.26E-06    |
| 0.885004024 | 0.86588  | 0.960489394 | 0.624611112 | 0.694296793 | 3.64E-06    | 0.28274594  |
| 0.390479646 | 0.07019  | 0.115357443 | 0.182671058 | 0.001385536 | 0.719727929 | 0.001253427 |
| 0.428295664 | 0.86587  | 0.858094746 | 0.665234694 | 0.457021146 | 0.00039341  | 0.095719453 |
| 0.029931096 | 0.19016  | 0.294433281 | 0.228992203 | 0.258033685 | 0.109143171 | 0.027809127 |
| 0.128809174 | 0.05462  | 0.165934189 | 0.076304155 | 3.48E-08    | 0.245405514 | 8.56E-06    |
| 0.237546747 | 0.02119  | 0.021541574 | 0.111492617 | 0.000400051 | 0.000104781 | 0.359412943 |

|             |         |             |             |             |             |             |
|-------------|---------|-------------|-------------|-------------|-------------|-------------|
| 0.931689147 | 0.32004 | 0.713399861 | 0.336023215 | 0.974100059 | 0.005681373 | 0.561673995 |
| 0.39705849  | 0.45454 | 0.972368439 | 0.516512727 | 0.130860516 | 0.008043606 | 0.342459109 |
| 0.676052532 | 0.79023 | 0.69299105  | 0.377312798 | 0.020149123 | 0.000417829 | 0.001467122 |
| 0.598514719 | 0.35706 | 0.976328694 | 0.053076105 | 0.135759717 | 0.058769411 | 0.10561571  |
| 0.994683955 | 0.33706 | 0.83396465  | 0.321423688 | 0.530613553 | 0.123915412 | 0.393441165 |
| 0.114802786 | 0.0405  | 0.156023017 | 0.016298125 | 0.000339126 | 0.19774177  | 2.31E-05    |
| 0.014866909 | 0.74868 | 0.379039849 | 0.932173152 | 0.633538642 | 0.689147604 | 1.83E-07    |
| 0.360091147 | 0.65557 | 0.72359177  | 0.431784732 | 0.616731605 | 0.000192245 | 0.658369636 |
| 0.444936006 | 0.30776 | 0.597002891 | 0.176298475 | 0.012370669 | 9.31E-05    | 0.652228714 |
| 0.087577146 | 0.62051 | 0.623079938 | 0.49062978  | 0.043043341 | 0.265977137 | 0.019726298 |
| 0.235012098 | 0.57944 | 0.702581869 | 0.40775933  | 0.425800692 | 1.87E-06    | 0.007169732 |
| 0.378230599 | 0.64657 | 0.903797966 | 0.887696695 | 0.33325685  | 1.06E-05    | 0.026498563 |
| 0.410889435 | 0.02794 | 0.077609696 | 0.093189165 | 0.027920649 | 2.41E-06    | 5.91E-06    |
| 0.678116978 | 0.75939 | 0.94179426  | 0.581386469 | 0.845801654 | 0.001511387 | 0.437573073 |
| 0.644955856 | 0.53929 | 0.389852347 | 0.813285215 | 0.136129892 | 0.010778042 | 0.000541996 |
| 0.354099083 | 0.54041 | 0.910968004 | 0.519707246 | 0.605025393 | 5.74E-05    | 8.50E-07    |
| 0.893829034 | 0.80193 | 0.994345773 | 0.553238186 | 0.193715038 | 0.000684603 | 0.143433911 |
| 0.477491412 | 0.2607  | 0.246100587 | 0.844232445 | 0.815929815 | 0.00172071  | 0.003839608 |
| 0.687011785 | 0.89693 | 0.843466583 | 0.82550463  | 0.355705455 | 1.78E-06    | 1.06E-06    |
| 0.015719486 | 0.5983  | 0.054258368 | 0.562497536 | 0.248960013 | 0.016399432 | 0.001281879 |
| 0.053184647 | 0.16396 | 0.098566964 | 0.334607565 | 0.001707683 | 0.793078565 | 0.063061731 |
| 0.612392389 | 0.86815 | 0.807922101 | 0.82501832  | 0.676117964 | 1.25E-07    | 0.045823148 |
| 0.846836371 | 0.04602 | 0.500021982 | 0.009365568 | 0.000166155 | 7.91E-17    | 0.001903437 |
| 0.002424373 | 0.02411 | 0.010521063 | 0.100375657 | 0.003701815 | 8.65E-09    | 0.636163749 |
| 0.782643882 | 0.31765 | 0.490220108 | 0.268407965 | 2.58E-06    | 0.982717263 | 0.112172992 |
| 0.731757269 | 0.75146 | 0.996922644 | 0.935101999 | 0.637874398 | 0.018603775 | 0.353091595 |
| 0.001101938 | 0.09846 | 0.009407905 | 0.43953551  | 0.49146502  | 0.347337459 | 0.008222289 |
| 0.822128083 | 0.76567 | 0.678654757 | 0.983636446 | 0.046157101 | 0.673608225 | 0.744145099 |
| 0.282924852 | 0.23704 | 0.733748224 | 0.067047187 | 0.053049093 | 0.007065453 | 0.004521334 |
| 0.334696786 | 0.37693 | 0.60455516  | 0.326636555 | 0.128732411 | 0.300582035 | 0.045489756 |
| 0.79388956  | 0.81273 | 0.97213095  | 0.703294624 | 0.058309871 | 0.141115638 | 7.99E-10    |
| 0.614050069 | 0.13013 | 0.27025103  | 0.113500324 | 0.42150076  | 0.42820601  | 0.227893156 |
| 0.31496891  | 0.46236 | 0.52796376  | 0.086410647 | 0.019865788 | 0.025059419 | 0.343478806 |
| 0.448542428 | 0.43718 | 0.751699296 | 0.198923226 | 0.052627017 | 7.41E-05    | 0.631694047 |
| 0.005175328 | 0.05312 | 0.065973736 | 0.072242146 | 0.004078206 | 0.539907491 | 0.081102221 |
| 0.00874612  | 0.68457 | 0.193635135 | 0.803227275 | 0.023749813 | 0.00478125  | 0.271405398 |
| 0.928085407 | 0.2558  | 0.736036802 | 0.161834591 | 0.02026096  | 0.002825847 | 0.021798308 |
| 0.260584564 | 0.68773 | 0.270705688 | 0.851398183 | 0.62115448  | 8.02E-11    | 0.189318588 |
| 0.438688914 | 0.66392 | 0.74850907  | 0.566207362 | 0.931896936 | 0.117081328 | 8.83E-07    |
| 0.013418859 | 0.04428 | 0.055463162 | 0.043165784 | 0.001078325 | 0.000457942 | 0.648154146 |
| 0.223770134 | 0.38849 | 0.883640559 | 0.397842213 | 0.197306509 | 6.28E-06    | 0.949318435 |
| 0.615032128 | 0.82326 | 0.781320595 | 0.482743106 | 0.505729229 | 0.000434888 | 0.022448091 |
| 0.958577961 | 0.47671 | 0.988618465 | 0.156040865 | 0.066223653 | 0.002550379 | 0.022542613 |
| 0.99699763  | 0.90265 | 0.656036638 | 0.534668983 | 0.905148061 | 0.335647692 | 0.004649745 |
| 0.364493645 | 0.37918 | 0.293149004 | 0.597877392 | 0.252258796 | 0.095386909 | 0.797358689 |

|             |         |             |             |             |             |             |
|-------------|---------|-------------|-------------|-------------|-------------|-------------|
| 0.819072308 | 0.15516 | 0.199567254 | 0.334731282 | 0.070320931 | 0.008341795 | 0.87197569  |
| 0.315697118 | 0.83011 | 0.652810645 | 0.551975858 | 0.944158338 | 0.126968869 | 0.520422394 |
| 0.319966739 | 0.46932 | 0.620779491 | 0.260705202 | 0.37775442  | 1.72E-06    | 0.208036358 |
| 0.396377759 | 0.66575 | 0.986878574 | 0.743428436 | 0.169277988 | 0.860255473 | 4.78E-05    |
| 0.701726051 | 0.48744 | 0.590574829 | 0.601753413 | 0.313373699 | 0.000104248 | 0.004204115 |
| 0.685562747 | 0.52743 | 0.957637653 | 0.447728528 | 0.86392068  | 1.69E-06    | 0.185138244 |
| 0.28003127  | 0.95047 | 0.419540579 | 0.534278707 | 0.005580614 | 7.75E-08    | 1.69E-05    |
| 0.63367516  | 0.62369 | 0.926147816 | 0.502801394 | 0.000219216 | 0.050075618 | 0.48610059  |
| 0.245268271 | 0.33365 | 0.92496191  | 0.146284793 | 0.256965734 | 0.002992685 | 0.034353254 |
| 0.626763194 | 0.16403 | 0.495078725 | 0.097174765 | 0.00011135  | 1.87E-10    | 0.168419114 |
| 0.045724231 | 0.15419 | 0.092257202 | 0.349010894 | 0.018215552 | 0.202562788 | 0.000865642 |
| 0.743096331 | 0.60496 | 0.71413551  | 0.893293818 | 0.652356264 | 6.01E-06    | 8.42E-06    |
| 0.010634222 | 0.22451 | 0.221851107 | 0.206100321 | 0.043420352 | 0.388060254 | 0.007510871 |
| 0.604159066 | 0.77816 | 0.954497621 | 0.758300931 | 0.170862038 | 0.022162222 | 0.772054949 |
| 0.93203707  | 0.06652 | 0.374113269 | 0.042474395 | 2.11E-05    | 0.13189074  | 1.59E-05    |
| 0.878320768 | 0.09803 | 0.67846526  | 0.023541849 | 2.83E-06    | 3.06E-18    | 0.004740124 |
| 0.044763649 | 0.07298 | 0.14882519  | 0.049412802 | 0.219158436 | 0.320631403 | 0.00011798  |
| 0.195084877 | 0.98183 | 0.08321283  | 0.094863169 | 0.033323404 | 0.002713818 | 0.335152864 |
| 0.975149202 | 0.43253 | 0.697620477 | 0.061847941 | 0.037141925 | 0.67404384  | 0.697119521 |
| 0.05419065  | 0.27156 | 0.179478981 | 0.562600563 | 0.520158352 | 2.01E-06    | 0.904762779 |
| 0.696073386 | 0.65306 | 0.667168695 | 0.169042322 | 0.095251032 | 0.137680965 | 0.00101211  |
| 0.960550749 | 0.56338 | 0.805088505 | 0.52724627  | 0.163342697 | 0.006720893 | 0.418737225 |
| 0.027889642 | 0.29007 | 0.306246429 | 0.32164418  | 0.107063445 | 0.92500539  | 0.009878668 |
| 0.072038135 | 0.244   | 0.435826214 | 0.207442295 | 0.007347971 | 0.063442434 | 0.138585448 |
| 0.40423917  | 0.29283 | 0.644617471 | 0.159499843 | 0.001986125 | 6.83E-07    | 0.051027873 |
| 0.021725911 | 0.30903 | 0.085782518 | 0.97814729  | 0.652950019 | 0.04188416  | 9.82E-06    |
| 0.256326244 | 0.24665 | 0.212995446 | 0.552975616 | 0.045589316 | 9.96E-08    | 0.016968489 |
| 0.549605039 | 0.9049  | 0.67889374  | 0.823565945 | 0.162154491 | 9.01E-06    | 0.003493784 |
| 0.007187152 | 0.10362 | 0.069532724 | 0.166338002 | 0.143805527 | 0.014090998 | 0.188699957 |
| 0.640550102 | 0.02315 | 0.087408808 | 0.082931703 | 0.00311391  | 7.35E-05    | 0.251755987 |
| 0.884809918 | 0.51609 | 0.78119204  | 0.293590166 | 0.999238187 | 5.22E-05    | 0.000853933 |
| 0.594889522 | 0.61894 | 0.952881409 | 0.616080988 | 0.04779439  | 0.000134168 | 0.18307423  |
| 0.669918238 | 0.29892 | 0.716064184 | 0.148934298 | 0.001111489 | 0.000810056 | 0.134402733 |
| 0.298252291 | 0.96901 | 0.646941542 | 0.993762043 | 0.477209438 | 3.12E-05    | 0.096836525 |
| 0.298930078 | 0.41394 | 0.156959895 | 0.920895369 | 0.420643429 | 0.048526513 | 0.010473444 |
| 0.476303236 | 0.90051 | 0.686815291 | 0.64545341  | 0.025977568 | 0.002378985 | 0.339289059 |
| 0.08413336  | 0.82664 | 0.652270365 | 0.843523765 | 0.957746991 | 3.65E-07    | 0.099218149 |
| 0.143481333 | 0.36109 | 0.419667781 | 0.465488592 | 0.074139574 | 3.46E-05    | 0.000754345 |
| 0.712603249 | 0.8172  | 0.869288178 | 0.580946105 | 0.113969177 | 1.76E-06    | 0.012690718 |
| 0.970099485 | 0.89297 | 0.79098931  | 0.884076979 | 0.790162856 | 0.211399191 | 8.27E-09    |
| 0.87437764  | 0.26099 | 0.794331606 | 0.143663533 | 0.053836947 | 0.919337919 | 0.008345179 |
| 0.723542468 | 0.18752 | 0.816298827 | 0.016437413 | 0.001533047 | 2.64E-12    | 0.017439665 |
| 0.037789297 | 0.00964 | 0.025093801 | 0.017922863 | 6.72E-05    | 0.083242185 | 7.97E-06    |
| 0.972049185 | 0.74029 | 0.888066335 | 0.610010181 | 0.978594118 | 0.280140076 | 0.412634251 |
| 0.930632707 | 0.75341 | 0.90592962  | 0.480945428 | 0.853714788 | 0.7387459   | 0.472745108 |

|             |         |             |             |             |             |             |
|-------------|---------|-------------|-------------|-------------|-------------|-------------|
| 0.086704893 | 0.25219 | 0.163213692 | 0.273032129 | 0.356183602 | 0.034226398 | 0.096407564 |
| 0.056636233 | 0.29884 | 0.62451815  | 0.059231004 | 0.01689709  | 0.044048674 | 9.60E-13    |
| 0.425622163 | 0.62034 | 0.285518692 | 0.750359546 | 0.636527708 | 0.033427085 | 0.202984093 |
| 0.62703833  | 0.21302 | 0.58599635  | 0.140594459 | 0.040634343 | 0.007531301 | 0.845030579 |
| 0.717788465 | 0.87886 | 0.930324509 | 0.915720537 | 0.173296947 | 0.100114927 | 5.20E-10    |

| p.MMdarkgre | p.MMturq | p.MMlightcy | p.MMgrey60  | p.MMlightcy | p.MMmidnight | p.MMlight |
|-------------|----------|-------------|-------------|-------------|--------------|-----------|
| 9.76E-06    | 1.04E-12 | 0.04173492  | 0.499455356 | 0.301869305 | 0.838244401  | 0.08092   |
| 0.119907103 | 2.29E-05 | 0.678587836 | 0.902519547 | 0.748704552 | 0.177543792  | 2.45E-05  |
| 0.414722807 | 0.00044  | 0.141189279 | 0.116693164 | 0.380160088 | 0.959856557  | 0.00694   |
| 0.000273153 | 0.29526  | 0.624176611 | 8.10E-05    | 0.001152242 | 0.021814555  | 0.88281   |
| 0.167959258 | 0.12174  | 0.106710812 | 0.550888645 | 0.531310504 | 0.318586584  | 0.00353   |
| 2.43E-05    | 0.04382  | 0.039037502 | 0.567921263 | 0.844219992 | 0.239537551  | 4.39E-05  |
| 0.001177929 | 3.06E-14 | 0.012645854 | 0.545373894 | 0.001292366 | 0.922960789  | 0.10987   |
| 0.032939084 | 4.32E-11 | 0.155029408 | 0.399750985 | 0.010679385 | 0.912822852  | 0.00813   |
| 6.69E-08    | 1.49E-14 | 0.000984462 | 0.403522593 | 2.15E-05    | 0.228784772  | 5.99E-05  |
| 0.007005254 | 1.69E-06 | 0.089777446 | 0.135547636 | 0.00318237  | 0.009107486  | 0.0005    |
| 0.000371211 | 1.24E-11 | 0.170314363 | 0.47901984  | 0.001863305 | 0.068761106  | 5.70E-09  |
| 0.001764114 | 2.19E-14 | 0.000600865 | 0.80501717  | 0.000759899 | 0.369873014  | 4.71E-06  |
| 0.000740743 | 5.40E-14 | 0.346640508 | 0.953124822 | 0.902847945 | 0.509496611  | 0.11021   |
| 0.595554456 | 0.0075   | 0.000973138 | 0.041438886 | 0.283732884 | 0.166969433  | 0.62549   |
| 0.682331046 | 0.02035  | 0.36312991  | 0.052784262 | 0.052114272 | 5.89E-05     | 9.96E-07  |
| 0.247800135 | 0.13148  | 0.371370033 | 0.082029102 | 0.549387543 | 0.794099656  | 1.91E-07  |
| 0.032538319 | 0.15872  | 0.528878335 | 0.357487668 | 0.079902019 | 0.168407632  | 0.35243   |
| 0.102998092 | 0.02163  | 0.56832119  | 0.01989515  | 0.073009598 | 0.015626832  | 0.00035   |
| 0.178523338 | 1.49E-06 | 0.066123427 | 0.825856525 | 0.168565869 | 0.06188216   | 1.32E-06  |
| 0.030029562 | 4.57E-05 | 0.078800033 | 3.33E-06    | 0.000711332 | 4.30E-06     | 1.85E-05  |
| 1.33E-05    | 0.02283  | 0.130659778 | 0.978732412 | 0.499372328 | 0.144333871  | 0.00042   |
| 0.967921492 | 0.06337  | 0.640470783 | 0.192726002 | 0.580842366 | 0.184178849  | 0.00221   |
| 0.287503775 | 0.00024  | 0.703847978 | 0.02136657  | 0.037636069 | 0.310735367  | 0.32753   |
| 0.005154489 | 4.80E-07 | 0.362085979 | 0.878036573 | 0.007649526 | 0.159698948  | 0.00041   |
| 0.359408677 | 0.00084  | 0.739751127 | 0.747600816 | 0.1966922   | 0.097182204  | 1.30E-05  |
| 0.91812466  | 7.33E-05 | 0.83399529  | 0.075338464 | 0.377771127 | 0.009807642  | 0.30632   |
| 0.000479578 | 0.14338  | 0.570144135 | 0.004359993 | 0.432111262 | 0.993550925  | 3.17E-08  |
| 0.001130079 | 7.38E-08 | 4.49E-05    | 2.34E-05    | 1.43E-14    | 1.94E-11     | 6.22E-21  |
| 1.94E-07    | 0.12917  | 0.391023255 | 0.392385239 | 0.105228353 | 0.04926955   | 1.75E-11  |
| 4.00E-05    | 2.74E-12 | 0.017629125 | 0.006370785 | 1.33E-07    | 0.000641842  | 2.89E-05  |
| 0.000223534 | 0.31355  | 0.438178877 | 0.09259042  | 0.471195115 | 0.687945608  | 4.99E-09  |
| 4.97E-06    | 1.59E-14 | 1.38E-06    | 0.016729486 | 3.28E-07    | 0.010039795  | 0.00011   |
| 1.40E-12    | 4.26E-30 | 0.000536571 | 0.376243158 | 0.00106745  | 0.663992064  | 0.26278   |
| 0.404312585 | 0.14267  | 0.432162436 | 0.044022939 | 0.243465384 | 0.544982017  | 0.00344   |
| 0.023081894 | 2.63E-07 | 0.730955637 | 0.960678641 | 0.557289746 | 0.490320294  | 0.1194    |
| 0.002956584 | 3.87E-05 | 0.010140858 | 0.000702659 | 0.044429541 | 0.003147358  | 0.25348   |
| 0.683985218 | 0.00855  | 0.052677555 | 0.043533138 | 3.24E-05    | 0.01874104   | 0.00039   |
| 0.000603173 | 1.21E-08 | 0.018233831 | 0.488466333 | 0.220716334 | 0.085640134  | 0.27388   |
| 6.07E-05    | 2.51E-10 | 0.585533819 | 0.213685642 | 0.04101477  | 0.048849286  | 0.02106   |
| 0.001131412 | 0.3561   | 0.566738767 | 0.005554894 | 0.012030997 | 0.754441965  | 0.0001    |
| 0.489987967 | 0.0002   | 0.018975902 | 0.000520541 | 0.000928271 | 4.76E-05     | 2.40E-05  |
| 3.81E-06    | 0.04968  | 0.544928998 | 0.236545749 | 0.476620701 | 0.015240923  | 1.37E-18  |
| 0.00931254  | 2.45E-07 | 0.178744032 | 0.000580978 | 7.43E-07    | 0.005857244  | 0.00176   |
| 0.013115824 | 1.51E-07 | 0.13335706  | 0.037242446 | 0.009452514 | 0.007116909  | 0.01479   |

|             |          |             |             |             |             |          |
|-------------|----------|-------------|-------------|-------------|-------------|----------|
| 0.032399984 | 1.36E-06 | 0.197551497 | 0.437765168 | 0.226702671 | 0.076013947 | 0.00736  |
| 0.000651323 | 0.03164  | 0.017288614 | 0.050602066 | 0.325747566 | 0.000471891 | 0.00113  |
| 0.000169042 | 4.89E-12 | 0.001857378 | 0.315411152 | 0.000326916 | 0.415709083 | 0.00059  |
| 0.000344941 | 0.00256  | 0.034012292 | 0.144211021 | 0.139952183 | 0.062689271 | 1.11E-05 |
| 0.063002601 | 0.33212  | 0.055254133 | 2.95E-08    | 6.83E-06    | 0.091771875 | 0.01205  |
| 0.00680235  | 0.35798  | 0.009882891 | 0.235998808 | 0.005772792 | 0.34511948  | 2.16E-06 |
| 7.86E-06    | 0.00018  | 0.201659825 | 0.000167846 | 0.004855072 | 3.27E-09    | 1.92E-14 |
| 0.143497027 | 2.43E-06 | 0.065214654 | 0.763810837 | 0.869483618 | 0.594445137 | 0.05805  |
| 0.147628109 | 2.46E-05 | 0.718049016 | 0.639652619 | 0.001884449 | 0.01980728  | 9.72E-14 |
| 0.029548101 | 5.48E-05 | 0.09466516  | 0.152722041 | 0.048331787 | 0.011293627 | 3.02E-07 |
| 0.000587859 | 6.16E-08 | 0.49320619  | 0.824028108 | 0.228995756 | 0.447098329 | 0.90648  |
| 0.091903117 | 4.23E-05 | 0.128967148 | 0.080445172 | 0.574691172 | 0.022154762 | 0.00588  |
| 7.45E-05    | 2.42E-14 | 0.347636274 | 0.265798708 | 0.770776152 | 0.241795452 | 0.4338   |
| 0.494681272 | 1.31E-05 | 0.750948183 | 0.039081505 | 0.037774198 | 0.055605601 | 0.02266  |
| 0.008703679 | 3.68E-07 | 0.064296325 | 0.478737171 | 0.20227062  | 0.243192732 | 0.60952  |
| 0.000278224 | 3.66E-14 | 0.293483823 | 0.097288876 | 0.673842061 | 0.434149135 | 3.42E-06 |
| 0.056053422 | 1.79E-08 | 0.053650221 | 0.304694295 | 0.03273703  | 0.023610449 | 0.00041  |
| 9.51E-09    | 2.96E-07 | 0.448561579 | 0.74978608  | 0.902539943 | 0.35853532  | 1.27E-06 |
| 1.37E-06    | 8.02E-10 | 0.126491484 | 0.004949133 | 0.181004289 | 8.13E-06    | 0.00016  |
| 0.003777553 | 1.96E-08 | 0.831161563 | 0.919899178 | 0.000431929 | 0.028839606 | 7.89E-09 |
| 0.71264547  | 0.93845  | 0.000989276 | 0.026049141 | 0.018824141 | 0.000907539 | 2.77E-05 |
| 0.003060057 | 7.42E-17 | 0.854018434 | 0.024237647 | 0.396616336 | 0.070114175 | 0.01102  |
| 0.00080075  | 8.26E-18 | 0.002795289 | 0.631379633 | 0.000124788 | 0.759285427 | 0.06031  |
| 0.264856733 | 5.86E-10 | 0.001443173 | 0.000170253 | 0.16309651  | 0.053525841 | 3.83E-08 |
| 0.000120137 | 0.40778  | 0.309422436 | 0.000400635 | 0.098963634 | 0.000146629 | 0.0031   |
| 0.611302137 | 0.00269  | 0.432123364 | 0.898851136 | 0.22019854  | 0.135130592 | 3.79E-05 |
| 0.639296777 | 0.05876  | 1.72E-21    | 0.030399282 | 0.982264488 | 0.854256646 | 6.14E-05 |
| 0.185540094 | 0.24474  | 0.379175251 | 0.705302718 | 0.367706537 | 0.97804813  | 6.28E-11 |
| 0.00128535  | 0.77196  | 0.835356185 | 0.373219083 | 0.183190194 | 0.278488387 | 1.32E-11 |
| 0.011241535 | 0.51192  | 0.06910529  | 0.222052701 | 0.017091561 | 0.000329103 | 1.68E-11 |
| 8.39E-09    | 3.66E-15 | 0.585642554 | 0.571263531 | 0.045410583 | 0.5064169   | 3.00E-05 |
| 0.701639873 | 0.07766  | 0.930637535 | 0.015338277 | 0.092311655 | 0.57502603  | 5.06E-07 |
| 0.11622653  | 0.001    | 0.01030063  | 0.212438061 | 1.45E-05    | 0.000223644 | 5.25E-19 |
| 0.846562431 | 0.00011  | 0.132442119 | 0.958731474 | 0.040189914 | 0.099760741 | 5.00E-10 |
| 0.009148242 | 0.79032  | 0.354162513 | 0.307922815 | 0.753304313 | 0.449620984 | 1.27E-10 |
| 0.610033269 | 0.00436  | 0.594957149 | 0.482610651 | 0.013576206 | 0.185121778 | 8.58E-07 |
| 0.10630065  | 1.25E-07 | 0.337851599 | 0.771309657 | 0.000152644 | 0.020578524 | 6.71E-12 |
| 0.384317182 | 2.18E-08 | 0.115828372 | 0.18546804  | 0.92258288  | 0.96088149  | 0.00158  |
| 1.87E-06    | 2.82E-06 | 0.72788082  | 0.808977119 | 0.941554476 | 0.01399022  | 3.14E-07 |
| 0.82317703  | 0.0005   | 0.001163574 | 0.009380085 | 0.063761072 | 0.000543548 | 0.14394  |
| 4.69E-06    | 7.59E-14 | 0.005780489 | 0.00582961  | 0.066313448 | 0.004350561 | 0.74892  |
| 0.666489597 | 0.13011  | 0.027812236 | 0.012984322 | 0.000112258 | 1.05E-06    | 4.40E-08 |
| 0.321629156 | 2.64E-06 | 0.073730886 | 0.346534719 | 0.206900118 | 0.556440694 | 2.25E-06 |
| 0.011461446 | 0.04556  | 0.507506525 | 0.166237899 | 0.094271838 | 0.001771712 | 3.97E-05 |
| 0.773115183 | 0.00617  | 0.279639657 | 0.187659105 | 0.58321531  | 0.006593335 | 0.77447  |

|             |          |             |             |             |             |          |
|-------------|----------|-------------|-------------|-------------|-------------|----------|
| 0.519480497 | 0.00046  | 0.364475307 | 0.03250064  | 0.524713178 | 0.011655182 | 0.03571  |
| 0.004610593 | 0.74074  | 0.029026219 | 0.004817803 | 0.001679472 | 0.321912537 | 0.13313  |
| 0.024453775 | 7.87E-12 | 0.147446818 | 0.028874651 | 0.326337864 | 0.161630336 | 0.36606  |
| 3.33E-11    | 4.49E-09 | 0.094962044 | 0.383540959 | 0.720522942 | 0.001647446 | 1.04E-06 |
| 0.722667183 | 5.25E-07 | 0.444017776 | 0.004645388 | 0.089571374 | 0.009170788 | 0.9418   |
| 0.032844048 | 1.30E-08 | 0.025748403 | 0.286692645 | 0.284441342 | 0.053991813 | 0.08793  |
| 0.002477797 | 1.98E-12 | 0.016561057 | 0.928766913 | 0.002370361 | 0.850809489 | 0.00323  |
| 0.179307715 | 0.02344  | 0.562389633 | 0.741751411 | 0.790488532 | 0.047983827 | 0.00077  |
| 0.187849801 | 1.67E-05 | 0.129408323 | 0.319445336 | 0.095658942 | 0.78718796  | 0.14387  |
| 0.001186414 | 9.31E-16 | 0.000220947 | 0.491613436 | 5.20E-05    | 0.210589038 | 9.70E-09 |
| 8.28E-05    | 5.66E-08 | 0.008945879 | 0.019623102 | 0.00324022  | 0.000130338 | 0.00366  |
| 5.41E-07    | 5.68E-19 | 0.018172296 | 0.293412453 | 0.007347896 | 0.46895279  | 0.1152   |
| 0.000289709 | 0.51162  | 0.314142048 | 0.052710065 | 0.176584435 | 0.924808052 | 3.28E-11 |
| 0.959291318 | 0.00037  | 0.582065378 | 0.116212322 | 0.871071809 | 0.730044583 | 0.00098  |
| 0.04010997  | 0.00195  | 0.019060086 | 0.000526335 | 6.30E-07    | 0.010067441 | 0.24165  |
| 9.14E-07    | 2.42E-29 | 0.011553702 | 0.879540943 | 8.02E-05    | 0.79656084  | 6.66E-05 |
| 9.51E-10    | 2.29E-16 | 0.009372411 | 0.080187539 | 0.099613216 | 0.262205269 | 0.32838  |
| 0.057304887 | 0.01929  | 0.775626509 | 0.025356619 | 0.455178402 | 0.080387193 | 3.15E-07 |
| 0.00289683  | 0.89995  | 0.402698959 | 0.116196856 | 0.439694604 | 0.729852452 | 1.14E-09 |
| 0.032309942 | 2.95E-06 | 0.059189994 | 0.720074826 | 0.39544798  | 0.019077358 | 0.51772  |
| 0.011121833 | 0.98204  | 0.607560336 | 0.266007743 | 0.048176367 | 0.045422801 | 3.42E-10 |
| 0.891562049 | 0.00066  | 0.135150401 | 0.633277785 | 0.258366624 | 0.196957142 | 1.28E-05 |
| 0.289314278 | 0.74698  | 0.04074744  | 0.01455487  | 0.000300295 | 2.45E-07    | 1.43E-11 |
| 0.066754608 | 0.0001   | 0.216643563 | 0.204261612 | 0.000917944 | 0.001572079 | 2.20E-10 |
| 0.118121499 | 2.22E-09 | 0.015596612 | 0.602865995 | 0.000738556 | 0.125082455 | 1.53E-08 |
| 0.117186809 | 1.83E-06 | 0.619021609 | 0.704610031 | 0.114797872 | 0.880719356 | 1.89E-05 |
| 0.066505473 | 7.11E-14 | 0.189699125 | 0.194546953 | 0.436286948 | 0.025398816 | 0.07252  |
| 0.211182954 | 3.53E-08 | 0.058627638 | 0.969969732 | 0.879038733 | 0.459379439 | 0.35599  |
| 0.343528524 | 0.00104  | 0.123025873 | 0.478631216 | 0.025160883 | 0.299113155 | 0.60197  |
| 0.016251658 | 4.11E-07 | 0.033157182 | 0.65739944  | 0.893601368 | 0.333274462 | 0.76526  |
| 2.41E-08    | 6.81E-13 | 0.000751428 | 1.08E-05    | 4.98E-05    | 1.22E-05    | 0.88027  |
| 0.148526008 | 5.00E-06 | 0.528561853 | 0.423013563 | 0.89754923  | 0.022037598 | 0.02055  |
| 0.643092461 | 9.43E-07 | 0.154020064 | 0.563588447 | 0.013471188 | 0.561266962 | 3.04E-12 |
| 0.034773905 | 2.00E-10 | 0.313144259 | 0.344405211 | 0.038815401 | 0.020771342 | 0.35287  |
| 0.032341357 | 4.52E-07 | 0.948040496 | 0.747610319 | 0.003512509 | 0.034064157 | 1.15E-09 |
| 0.464766227 | 9.10E-05 | 0.070378288 | 0.076528716 | 0.000123058 | 0.012981646 | 1.91E-05 |
| 0.00212467  | 3.65E-14 | 0.594531142 | 0.003235753 | 0.093385411 | 0.22242781  | 0.38015  |
| 0.001067447 | 5.80E-14 | 0.424876449 | 0.2404253   | 0.753842802 | 0.527826842 | 0.07443  |
| 7.98E-07    | 4.83E-20 | 0.071291464 | 0.035174029 | 0.000171695 | 0.053718868 | 0.00863  |
| 3.25E-09    | 1.58E-05 | 0.928994294 | 0.61584241  | 0.351846947 | 0.049229698 | 5.03E-10 |
| 7.07E-06    | 0.01995  | 0.639316418 | 0.284070195 | 0.142497871 | 0.14292624  | 6.59E-09 |
| 0.033873626 | 4.25E-14 | 0.079228475 | 0.119414446 | 0.018185109 | 0.612863062 | 3.76E-06 |
| 0.118825908 | 0.113    | 0.060777787 | 0.739594659 | 0.423461741 | 0.930698162 | 0.00115  |
| 0.253344772 | 0.78264  | 0.608931342 | 0.973682851 | 0.679794818 | 0.188344383 | 0.00011  |
| 0.006817402 | 0.03238  | 0.543305024 | 0.867836972 | 0.385221275 | 0.93753574  | 0.00149  |

|             |          |             |             |             |             |          |
|-------------|----------|-------------|-------------|-------------|-------------|----------|
| 0.002339684 | 0.87388  | 0.510630852 | 0.005025606 | 0.145544184 | 0.374449157 | 6.14E-07 |
| 1.45E-08    | 1.02E-06 | 0.228312264 | 0.682966658 | 0.9023433   | 0.896768546 | 2.78E-09 |
| 0.742184416 | 0.00033  | 0.530938905 | 0.233883371 | 0.153748006 | 0.530731259 | 8.56E-11 |
| 0.366935999 | 0.00547  | 0.770699648 | 0.097705259 | 0.838325197 | 0.341529638 | 0.00011  |
| 1.83E-09    | 8.12E-13 | 0.089730076 | 0.005682522 | 0.213186    | 0.000277661 | 6.48E-07 |



p.MMplum2 p.MMgrey

|             |          |
|-------------|----------|
| 0.403242374 | 3.29E-13 |
| 0.193593842 | 6.80E-16 |
| 0.002973652 | 3.28E-18 |
| 1.78E-11    | 1.62E-24 |
| 0.557656911 | 7.71E-24 |
| 0.82184764  | 5.99E-24 |
| 0.621390893 | 1.57E-07 |
| 0.045988682 | 2.26E-13 |
| 0.613547308 | 8.06E-26 |
| 0.92575632  | 1.27E-19 |
| 0.086031625 | 3.82E-31 |
| 0.961847673 | 7.96E-30 |
| 0.002317518 | 1.15E-29 |
| 0.000171516 | 5.92E-16 |
| 0.192195175 | 8.10E-38 |
| 0.769852519 | 1.13E-22 |
| 0.000493961 | 2.06E-21 |
| 0.013401248 | 2.18E-27 |
| 0.60457092  | 1.10E-51 |
| 0.002774523 | 7.45E-13 |
| 0.260924492 | 5.64E-13 |
| 0.991555566 | 2.93E-11 |
| 0.000983193 | 8.22E-44 |
| 0.923716725 | 3.28E-12 |
| 0.815509936 | 1.04E-22 |
| 1.18E-06    | 3.06E-22 |
| 0.367023048 | 4.58E-56 |
| 8.16E-05    | 1.48E-40 |
| 0.23315686  | 4.70E-29 |
| 0.35265561  | 5.82E-16 |
| 0.874811027 | 4.41E-38 |
| 0.514930384 | 4.34E-22 |
| 0.01693103  | 2.23E-21 |
| 0.011654382 | 5.65E-23 |
| 0.261370612 | 7.57E-11 |
| 0.167468587 | 1.39E-11 |
| 0.469045594 | 2.69E-06 |
| 0.607881807 | 1.29E-18 |
| 0.382045467 | 2.26E-11 |
| 0.787993292 | 4.25E-27 |
| 0.538734089 | 4.83E-30 |
| 0.002173218 | 7.80E-58 |
| 0.502139539 | 4.65E-20 |
| 0.716681216 | 1.37E-19 |

0.78437303 6.08E-31  
0.974609001 2.10E-31  
0.677074997 4.87E-13  
0.450024496 2.46E-19  
0.511693145 5.10E-28  
0.990812141 2.86E-12  
9.68E-07 1.77E-40  
0.978096529 4.38E-15  
0.017122167 2.65E-36  
0.052616291 5.47E-42  
0.928528691 8.22E-07  
0.424286519 4.35E-25  
0.774564821 6.44E-23  
0.076633699 8.75E-23  
0.006101036 6.26E-08  
0.552583811 9.04E-47  
0.895214006 3.58E-42  
0.383276823 1.56E-24  
0.343176918 2.41E-14  
0.06901095 1.29E-17  
0.139943713 2.61E-30  
0.019314069 2.52E-37  
0.063174711 2.97E-12  
0.22196772 2.27E-91  
4.12E-06 1.79E-29  
0.967166877 7.66E-31  
0.049292996 2.21E-06  
0.6873756 7.43E-38  
0.995955491 3.10E-35  
0.167498854 2.58E-48  
0.428077524 1.91E-24  
0.640953787 1.47E-45  
0.000257737 9.56E-37  
0.686362383 1.12E-62  
0.739923056 8.45E-69  
0.337642278 1.27E-08  
0.044572423 2.49E-27  
0.122669178 1.56E-37  
0.312775545 2.78E-21  
0.86578285 4.60E-39  
0.997284578 4.37E-19  
0.001602811 9.53E-11  
0.1623276 2.37E-44  
0.453302983 5.39E-09  
0.013094271 0.00017

0.00232692 2.41E-19  
0.308207663 5.55E-20  
0.000780172 8.82E-25  
0.573902451 1.00E-34  
1.51E-12 2.06E-41  
0.058594066 1.03E-26  
0.080903904 1.60E-09  
0.013068331 7.51E-17  
0.024730415 9.35E-08  
0.67777227 3.40E-44  
0.01148658 2.84E-25  
0.004432804 1.45E-25  
0.757854111 2.71E-76  
0.468405955 4.86E-22  
0.204152238 0.00011  
0.040410936 3.07E-24  
0.644993063 1.01E-26  
0.006265829 2.06E-25  
0.388525105 7.23E-26  
0.359080639 2.32E-14  
0.954307079 5.68E-39  
0.618910873 1.39E-28  
1.58E-05 1.23E-37  
0.011234348 1.13E-44  
0.630151259 2.88E-55  
0.331137119 4.18E-17  
0.027933618 3.52E-36  
0.000675374 2.21E-18  
0.047328039 1.05E-34  
0.971882356 5.13E-17  
0.12351996 4.87E-08  
0.297310006 9.43E-31  
0.259586342 4.24E-46  
1.34E-09 1.88E-32  
0.001622697 4.18E-18  
0.459781426 2.56E-19  
0.01585496 4.70E-43  
0.01302258 4.05E-16  
0.845396739 1.36E-17  
0.034686436 1.41E-40  
0.073710293 3.16E-17  
0.074618942 3.24E-35  
0.267269781 3.94E-28  
0.450372055 1.71E-19  
0.075950761 1.74E-05

|             |          |
|-------------|----------|
| 0.263207333 | 3.55E-58 |
| 0.152993757 | 3.40E-18 |
| 0.290401636 | 4.15E-39 |
| 0.370810337 | 1.81E-20 |
| 0.418183334 | 1.49E-09 |
