# Supplementary material for: Comprehensive Analysis of GDF10 Methylation Site-Associated Genes as Prognostic Markers for Endometrial Cancer
Source: Hindawi journal article supplement (doi:10.1155/2022/7117083), 2022-10-10
Supplement: f1 [file 7117083.f1.zip]

| id           | OS.time | OS     | B4GALNT3 | GREB1  | DNAJC22 | riskScore | risk |
|--------------|---------|--------|----------|--------|---------|-----------|------|
| TCGA-2E-A9G8 | 3.4219  | 0.0000 | 2.9385   | 1.2434 | 1.9208  | 1.9441    | high |
| TCGA-A5-A0G1 | 8.9068  | 1.0000 | 3.7154   | 0.0442 | 1.7385  | 2.5036    | high |
| TCGA-A5-A0GG | 10.3068 | 0.0000 | 4.2929   | 1.3301 | 2.8657  | 1.0833    | high |
| TCGA-A5-A0GQ | 6.1562  | 0.0000 | 3.9136   | 1.9380 | 3.0361  | 0.9337    | high |
| TCGA-A5-A0GR | 3.0685  | 0.0000 | 2.1124   | 0.1341 | 1.2308  | 4.1079    | high |
| TCGA-A5-A1OF | 2.6658  | 0.0000 | 2.4107   | 2.5015 | 3.0975  | 1.1216    | high |
| TCGA-A5-A1OG | 2.6658  | 1.0000 | 2.9465   | 1.3197 | 2.5947  | 1.6368    | high |
| TCGA-A5-A1OH | 3.0274  | 0.0000 | 1.3753   | 1.7183 | 4.6888  | 1.3749    | high |
| TCGA-A5-A1OJ | 2.7562  | 0.0000 | 2.4232   | 2.9101 | 2.3367  | 1.1405    | high |
| TCGA-A5-A2K2 | 9.8493  | 0.0000 | 2.6524   | 0.9440 | 0.6477  | 3.0483    | high |
| TCGA-A5-A2K3 | 5.5123  | 0.0000 | 2.3560   | 0.1764 | 0.1501  | 4.7814    | high |
| TCGA-A5-A3LP | 1.2466  | 0.0000 | 2.3022   | 0.2642 | 2.0347  | 3.1487    | high |
| TCGA-A5-A7WJ | 0.9342  | 0.0000 | 4.9634   | 0.3066 | 4.0745  | 1.0034    | high |
| TCGA-AJ-A23N | 1.2027  | 1.0000 | 2.7210   | 1.7325 | 3.0137  | 1.3756    | high |
| TCGA-AJ-A2QM | 2.4493  | 0.0000 | 3.0424   | 2.6985 | 1.6811  | 1.2008    | high |
| TCGA-AJ-A3BD | 2.8466  | 0.0000 | 4.5166   | 1.0128 | 3.3888  | 1.0208    | high |
| TCGA-AJ-A3EJ | 0.1370  | 1.0000 | 2.4315   | 1.9940 | 1.0337  | 2.0650    | high |
| TCGA-AJ-A3EL | 1.8740  | 0.0000 | 2.9269   | 3.4572 | 1.6768  | 0.9515    | high |
| TCGA-AJ-A3I9 | 1.4219  | 1.0000 | 5.6362   | 1.3472 | 1.6212  | 0.9885    | high |
| TCGA-AJ-A3IA | 1.7342  | 0.0000 | 2.6214   | 0.6658 | 1.3975  | 2.8858    | high |
| TCGA-AJ-A3NC | 3.0822  | 0.0000 | 3.5597   | 1.8951 | 2.6434  | 1.1301    | high |
| TCGA-AJ-A3NF | 1.7671  | 0.0000 | 2.3516   | 2.5410 | 1.8642  | 1.4609    | high |
| TCGA-AJ-A3NG | 1.3014  | 0.0000 | 3.2204   | 0.9517 | 1.4164  | 2.2256    | high |
| TCGA-AJ-A3QS | 1.4055  | 0.0000 | 2.5298   | 2.0718 | 1.4425  | 1.7957    | high |
| TCGA-AJ-A3TW | 1.4055  | 0.0000 | 5.0833   | 0.0468 | 2.0675  | 1.6319    | high |
| TCGA-AP-A0LF | 7.7945  | 0.0000 | 5.3919   | 0.4167 | 0.2656  | 1.9431    | high |
| TCGA-AP-A0LS | 7.9562  | 0.0000 | 4.0678   | 1.0466 | 2.0907  | 1.4953    | high |
| TCGA-AP-A1DK | 7.5808  | 0.0000 | 4.5664   | 0.6688 | 3.2205  | 1.1770    | high |
| TCGA-AP-A1E3 | 2.3205  | 0.0000 | 5.0773   | 2.7314 | 0.2221  | 0.9523    | high |
| TCGA-AP-A1E4 | 4.2603  | 0.0000 | 3.4294   | 1.5490 | 1.6581  | 1.6265    | high |
| TCGA-AP-A3K1 | 1.8247  | 1.0000 | 3.1743   | 1.4278 | 0.9232  | 2.1204    | high |
| TCGA-AX-A06D | 1.0219  | 1.0000 | 3.6623   | 0.3452 | 2.2286  | 2.0598    | high |
| TCGA-AX-A0IS | 5.0904  | 1.0000 | 3.0632   | 2.5054 | 2.4916  | 1.0747    | high |
| TCGA-AX-A0IZ | 3.6521  | 0.0000 | 3.9570   | 1.4131 | 3.0652  | 1.1012    | high |
| TCGA-AX-A0J0 | 3.3425  | 0.0000 | 2.1684   | 1.4532 | 2.6103  | 1.9080    | high |
| TCGA-AX-A1C7 | 2.8877  | 0.0000 | 2.6882   | 1.6709 | 2.2250  | 1.6766    | high |
| TCGA-AX-A1C8 | 2.1260  | 0.0000 | 1.5296   | 0.4081 | 2.1630  | 3.5655    | high |
| TCGA-AX-A1CA | 2.6685  | 0.0000 | 3.1759   | 0.7850 | 1.2917  | 2.4502    | high |
| TCGA-AX-A1CC | 2.1589  | 0.0000 | 2.5261   | 3.0591 | 2.2035  | 1.0846    | high |
| TCGA-AX-A1CE | 2.8411  | 0.0000 | 3.5990   | 1.9909 | 1.7847  | 1.2990    | high |
| TCGA-AX-A1CJ | 6.1178  | 0.0000 | 4.1661   | 2.3110 | 1.6161  | 1.0390    | high |
| TCGA-AX-A1CN | 3.1315  | 0.0000 | 4.2401   | 0.6990 | 0.5530  | 2.2380    | high |
| TCGA-AX-A1CP | 3.0329  | 0.0000 | 3.1750   | 1.3411 | 3.7912  | 1.1864    | high |

|              |        |        |        |        |        |        |      |
|--------------|--------|--------|--------|--------|--------|--------|------|
| TCGA-AX-A1CR | 1.9205 | 0.0000 | 2.0583 | 2.7439 | 2.5505 | 1.2699 | high |
| TCGA-AX-A2H4 | 2.5096 | 1.0000 | 3.3678 | 0.0492 | 0.1949 | 3.8013 | high |
| TCGA-AX-A2H5 | 5.9370 | 0.0000 | 3.2881 | 0.7244 | 3.7374 | 1.4437 | high |
| TCGA-AX-A2H7 | 2.1151 | 1.0000 | 2.9578 | 1.6926 | 0.4396 | 2.2683 | high |
| TCGA-AX-A2HC | 2.8603 | 0.0000 | 0.4466 | 3.9012 | 1.1100 | 1.7577 | high |
| TCGA-AX-A2HF | 2.3233 | 0.0000 | 3.1917 | 1.2029 | 0.8381 | 2.3241 | high |
| TCGA-AX-A2HG | 3.1863 | 0.0000 | 3.9936 | 1.1787 | 2.8562 | 1.2371 | high |
| TCGA-AX-A2HH | 1.4795 | 0.0000 | 4.5485 | 2.2818 | 1.3728 | 1.0004 | high |
| TCGA-AX-A2IN | 2.5945 | 1.0000 | 1.2198 | 0.9056 | 0.4444 | 4.6887 | high |
| TCGA-AX-A3FS | 0.0192 | 0.0000 | 2.6805 | 0.0983 | 0.7007 | 4.0147 | high |
| TCGA-AX-A3FT | 0.0164 | 0.0000 | 3.2293 | 0.9933 | 2.5796 | 1.7084 | high |
| TCGA-AX-A3FZ | 0.0164 | 0.0000 | 0.2744 | 1.1286 | 2.1311 | 3.8778 | high |
| TCGA-AX-A3G1 | 1.7096 | 1.0000 | 3.1907 | 2.6043 | 0.6906 | 1.4739 | high |
| TCGA-AX-A3G3 | 0.1151 | 0.0000 | 1.6906 | 0.4534 | 0.7401 | 4.5562 | high |
| TCGA-AX-A3G6 | 0.0219 | 0.0000 | 2.7190 | 1.0348 | 0.7313 | 2.8516 | high |
| TCGA-AX-A3G7 | 0.0247 | 0.0000 | 2.6294 | 2.3199 | 2.4661 | 1.2908 | high |
| TCGA-AX-A3G8 | 0.0986 | 0.0000 | 5.9197 | 0.3324 | 0.5945 | 1.6255 | high |
| TCGA-AX-A3G9 | 1.5288 | 0.0000 | 4.5285 | 0.8273 | 3.0000 | 1.1791 | high |
| TCGA-AX-A3GI | 0.0329 | 0.0000 | 2.5644 | 2.3871 | 0.1072 | 2.1193 | high |
| TCGA-B5-A0K8 | 2.3205 | 0.0000 | 4.0973 | 2.5941 | 1.3770 | 1.0087 | high |
| TCGA-B5-A0KB | 2.2575 | 0.0000 | 3.7911 | 1.4032 | 1.7938 | 1.5125 | high |
| TCGA-B5-A11E | 4.9863 | 0.0000 | 3.9141 | 1.4207 | 2.0995 | 1.3642 | high |
| TCGA-B5-A11I | 6.3096 | 0.0000 | 1.3682 | 2.9789 | 0.9435 | 1.9729 | high |
| TCGA-B5-A11L | 6.1370 | 1.0000 | 3.8395 | 0.7204 | 1.3003 | 2.1034 | high |
| TCGA-B5-A11P | 2.2603 | 0.0000 | 3.7223 | 2.6984 | 1.6032 | 1.0224 | high |
| TCGA-B5-A1MS | 8.5260 | 1.0000 | 2.8290 | 1.2124 | 2.5798 | 1.7575 | high |
| TCGA-B5-A1MU | 4.2411 | 1.0000 | 2.0891 | 2.2467 | 1.7193 | 1.7873 | high |
| TCGA-B5-A1MY | 0.9890 | 1.0000 | 3.2338 | 1.5485 | 2.4893 | 1.4343 | high |
| TCGA-B5-A1N2 | 2.6137 | 1.0000 | 2.6309 | 1.7769 | 0.8650 | 2.1912 | high |
| TCGA-B5-A5OD | 2.8438 | 0.0000 | 5.1559 | 1.3661 | 1.2909 | 1.1943 | high |
| TCGA-B5-A5OE | 2.9123 | 0.0000 | 2.0407 | 0.4206 | 0.2340 | 4.6847 | high |
| TCGA-BG-A0YV | 1.0466 | 0.0000 | 2.7919 | 1.3124 | 2.9413 | 1.5870 | high |
| TCGA-BG-A221 | 0.1507 | 0.0000 | 2.9215 | 1.1744 | 2.5037 | 1.7668 | high |
| TCGA-BG-A2L7 | 1.6767 | 0.0000 | 3.0835 | 2.6437 | 0.8899 | 1.4330 | high |
| TCGA-BG-A3EW | 0.9425 | 0.0000 | 3.4448 | 1.3837 | 3.3357 | 1.2004 | high |
| TCGA-BG-A3PP | 1.8658 | 0.0000 | 2.0654 | 0.9645 | 4.4383 | 1.5740 | high |
| TCGA-BK-A139 | 2.5836 | 1.0000 | 3.4179 | 2.5513 | 1.4248 | 1.2101 | high |
| TCGA-BK-A26L | 2.0110 | 0.0000 | 2.9354 | 2.7554 | 2.2643 | 1.0692 | high |
| TCGA-BS-A0T9 | 3.9123 | 1.0000 | 3.9404 | 1.7987 | 2.1303 | 1.1803 | high |
| TCGA-BS-A0U5 | 8.0411 | 0.0000 | 3.3490 | 2.1756 | 1.6825 | 1.3290 | high |
| TCGA-BS-A0V8 | 6.9699 | 0.0000 | 3.2444 | 1.8034 | 3.7457 | 1.0018 | high |
| TCGA-BS-A0VI | 7.2493 | 0.0000 | 3.6662 | 0.8187 | 3.2278 | 1.4109 | high |
| TCGA-BS-A0WQ | 5.5397 | 0.0000 | 3.2788 | 2.3010 | 2.9684 | 0.9855 | high |
| TCGA-D1-A0ZS | 0.4055 | 0.0000 | 1.3075 | 1.0425 | 0.9067 | 3.9601 | high |

|              |        |        |        |        |        |        |      |
|--------------|--------|--------|--------|--------|--------|--------|------|
| TCGA-D1-A0ZV | 1.9945 | 0.0000 | 3.4814 | 1.6508 | 2.0868 | 1.4137 | high |
| TCGA-D1-A0ZZ | 1.8795 | 0.0000 | 2.4867 | 1.4395 | 4.2467 | 1.2453 | high |
| TCGA-D1-A15V | 3.2904 | 0.0000 | 4.2183 | 2.1117 | 0.4315 | 1.4136 | high |
| TCGA-D1-A15X | 2.4904 | 0.0000 | 2.9444 | 0.0999 | 1.8700 | 2.9199 | high |
| TCGA-D1-A16G | 2.2849 | 1.0000 | 3.1380 | 0.3849 | 3.8929 | 1.6344 | high |
| TCGA-D1-A16J | 2.4932 | 0.0000 | 3.3760 | 0.3679 | 2.8634 | 1.9237 | high |
| TCGA-D1-A16Q | 0.8877 | 0.0000 | 3.3316 | 2.2346 | 1.8597 | 1.2595 | high |
| TCGA-D1-A16S | 1.5562 | 0.0000 | 2.2799 | 1.6154 | 3.2325 | 1.5344 | high |
| TCGA-D1-A16Y | 1.4575 | 0.0000 | 3.7128 | 1.9158 | 1.9050 | 1.2616 | high |
| TCGA-D1-A17C | 0.0822 | 0.0000 | 3.9281 | 2.8179 | 1.5066 | 0.9488 | high |
| TCGA-D1-A1NU | 1.1014 | 0.0000 | 3.2433 | 0.7645 | 1.4755 | 2.3316 | high |
| TCGA-D1-A1NW | 0.0603 | 0.0000 | 2.8864 | 1.0918 | 2.6999 | 1.7599 | high |
| TCGA-D1-A1NX | 1.5205 | 0.0000 | 3.3839 | 1.2000 | 2.5889 | 1.5241 | high |
| TCGA-D1-A1O0 | 0.1726 | 0.0000 | 4.0039 | 2.0162 | 1.8922 | 1.1323 | high |
| TCGA-D1-A1O8 | 0.3288 | 1.0000 | 2.9680 | 0.3040 | 0.2882 | 3.7859 | high |
| TCGA-D1-A2G0 | 4.0658 | 0.0000 | 3.7200 | 0.9001 | 0.3511 | 2.4953 | high |
| TCGA-D1-A2G6 | 0.7068 | 1.0000 | 2.7975 | 1.5545 | 4.4122 | 1.0651 | high |
| TCGA-D1-A3DG | 0.3562 | 1.0000 | 3.4850 | 1.0402 | 1.5534 | 1.9563 | high |
| TCGA-D1-A3JQ | 1.4411 | 0.0000 | 3.1828 | 1.7286 | 3.6863 | 1.0582 | high |
| TCGA-DF-A2KN | 0.1836 | 0.0000 | 4.3944 | 1.3299 | 1.8899 | 1.2987 | high |
| TCGA-DF-A2KU | 8.4027 | 0.0000 | 4.5003 | 0.5017 | 0.1306 | 2.4502 | high |
| TCGA-DF-A2KZ | 2.2630 | 0.0000 | 3.9007 | 1.1609 | 2.2553 | 1.4494 | high |
| TCGA-DF-A2L0 | 2.1589 | 1.0000 | 6.7200 | 0.5285 | 1.0176 | 1.1260 | high |
| TCGA-DI-A1NN | 2.9479 | 0.0000 | 3.0413 | 1.6408 | 1.3396 | 1.8657 | high |
| TCGA-DI-A1NO | 0.7808 | 1.0000 | 1.2837 | 0.9299 | 1.9826 | 3.2954 | high |
| TCGA-DI-A2QU | 2.5918 | 1.0000 | 2.1164 | 2.7320 | 0.3101 | 2.0237 | high |
| TCGA-E6-A1LZ | 6.5918 | 0.0000 | 2.0623 | 0.3713 | 1.6743 | 3.4873 | high |
| TCGA-E6-A1M0 | 4.9123 | 0.0000 | 3.0255 | 2.5590 | 1.2547 | 1.3864 | high |
| TCGA-E6-A2P8 | 0.1973 | 1.0000 | 4.7961 | 1.1453 | 0.1729 | 1.7973 | high |
| TCGA-E6-A8L9 | 2.7753 | 0.0000 | 3.1209 | 1.4349 | 1.5799 | 1.8650 | high |
| TCGA-EO-A1Y5 | 0.9096 | 0.0000 | 2.7266 | 0.6163 | 2.3583 | 2.3279 | high |
| TCGA-EO-A1Y8 | 2.4685 | 0.0000 | 3.5597 | 1.3010 | 1.5202 | 1.7647 | high |
| TCGA-EO-A22T | 5.5753 | 0.0000 | 4.5879 | 0.8051 | 1.7363 | 1.5311 | high |
| TCGA-EO-A2CH | 1.6164 | 1.0000 | 2.8360 | 1.2748 | 3.5457 | 1.3975 | high |
| TCGA-EO-A3AV | 2.9288 | 0.0000 | 3.6907 | 0.2461 | 3.9570 | 1.4646 | high |
| TCGA-EO-A3AZ | 2.2630 | 0.0000 | 3.4696 | 0.9024 | 2.2181 | 1.7887 | high |
| TCGA-EO-A3KU | 1.8548 | 0.0000 | 2.5944 | 1.4849 | 2.5423 | 1.7132 | high |
| TCGA-EO-A3KW | 1.3616 | 0.0000 | 3.6239 | 1.5029 | 2.5029 | 1.3123 | high |
| TCGA-EY-A1G8 | 1.2493 | 1.0000 | 3.3891 | 1.6924 | 3.7683 | 0.9978 | high |
| TCGA-EY-A1GL | 2.7781 | 0.0000 | 5.3353 | 1.2417 | 1.0441 | 1.2542 | high |
| TCGA-EY-A1GM | 2.7260 | 1.0000 | 2.9651 | 0.6416 | 1.1803 | 2.7863 | high |
| TCGA-EY-A1GS | 1.8356 | 1.0000 | 0.5926 | 0.2506 | 1.7406 | 5.2623 | high |
| TCGA-EY-A1GX | 3.0877 | 1.0000 | 3.7424 | 0.6137 | 3.3857 | 1.4362 | high |
| TCGA-EY-A210 | 1.0493 | 0.0000 | 4.1251 | 1.1017 | 0.7858 | 1.9080 | high |

|              |        |        |        |        |        |        |      |
|--------------|--------|--------|--------|--------|--------|--------|------|
| TCGA-EY-A2I2 | 0.8493 | 1.0000 | 2.5943 | 2.1135 | 2.0798 | 1.5195 | high |
| TCGA-EY-A2I5 | 1.5726 | 0.0000 | 3.0842 | 1.8178 | 3.0604 | 1.2026 | high |
| TCGA-EY-A2ON | 1.6712 | 1.0000 | 3.5008 | 0.8714 | 0.5826 | 2.5404 | high |
| TCGA-EY-A3L3 | 2.2795 | 0.0000 | 0.8850 | 2.4690 | 1.0788 | 2.5962 | high |
| TCGA-EY-A4KR | 0.9479 | 1.0000 | 2.7317 | 0.5418 | 0.3540 | 3.6557 | high |
| TCGA-EY-A54A | 1.2247 | 0.0000 | 2.6989 | 1.7253 | 3.1143 | 1.3577 | high |
| TCGA-EY-A72D | 0.4904 | 0.0000 | 4.0461 | 0.7926 | 1.4340 | 1.8891 | high |
| TCGA-FI-A2CY | 5.6986 | 0.0000 | 1.9814 | 2.4069 | 1.8381 | 1.6952 | high |
| TCGA-FI-A2D5 | 1.1534 | 1.0000 | 0.9801 | 0.3542 | 0.7475 | 5.6679 | high |
| TCGA-FI-A2D6 | 2.1014 | 1.0000 | 1.5735 | 2.0802 | 0.1413 | 3.0316 | high |
| TCGA-FI-A2EU | 8.0575 | 0.0000 | 1.6004 | 1.3873 | 2.3424 | 2.3972 | high |
| TCGA-FI-A2EW | 4.9178 | 0.0000 | 2.9522 | 0.5620 | 0.8295 | 3.0971 | high |
| TCGA-FI-A2EX | 0.7781 | 0.0000 | 2.9673 | 0.8514 | 0.4632 | 3.0160 | high |
| TCGA-FI-A2EY | 2.4110 | 1.0000 | 2.9564 | 1.1862 | 1.0012 | 2.4008 | high |
| TCGA-FI-A2F8 | 2.5562 | 0.0000 | 3.2142 | 2.3656 | 1.6329 | 1.3023 | high |
| TCGA-FI-A2F9 | 4.9397 | 0.0000 | 0.7153 | 1.6438 | 1.1849 | 3.5346 | high |
| TCGA-FI-A3PV | 3.4219 | 1.0000 | 3.8328 | 1.6003 | 1.3015 | 1.5515 | high |
| TCGA-H5-A2HR | 0.1452 | 0.0000 | 2.1299 | 0.6435 | 0.7895 | 3.7632 | high |
| TCGA-JU-AAVI | 1.4795 | 1.0000 | 2.2542 | 0.5511 | 0.4357 | 4.0563 | high |
| TCGA-K6-A3WQ | 1.1699 | 1.0000 | 1.9774 | 1.0608 | 3.1381 | 2.0543 | high |
| TCGA-KP-A3W0 | 1.1068 | 0.0000 | 3.6271 | 1.4429 | 1.9538 | 1.5049 | high |
| TCGA-KP-A3W1 | 0.7890 | 0.0000 | 2.3859 | 0.0609 | 0.1147 | 4.9761 | high |
| TCGA-KP-A3W3 | 2.1753 | 0.0000 | 2.4677 | 1.9749 | 1.4931 | 1.8673 | high |
| TCGA-PG-A5BC | 1.9370 | 0.0000 | 2.4372 | 2.1041 | 2.4766 | 1.4596 | high |
| TCGA-PG-A6IB | 1.7753 | 0.0000 | 1.6025 | 0.3910 | 0.2230 | 5.3190 | high |
| TCGA-PG-A7D5 | 3.2247 | 0.0000 | 1.8983 | 1.4268 | 1.9492 | 2.3787 | high |
| TCGA-PG-A9I5 | 0.6822 | 0.0000 | 3.0337 | 2.1166 | 1.8420 | 1.4237 | high |
| TCGA-QS-A8F1 | 0.3699 | 1.0000 | 2.8719 | 0.4545 | 1.3824 | 2.9184 | high |
| TCGA-SL-A6J9 | 0.0055 | 0.0000 | 1.0636 | 1.4099 | 0.6001 | 3.9650 | high |
| TCGA-4E-A92E | 0.0356 | 0.0000 | 4.7534 | 2.7324 | 3.6252 | 0.5019 | low  |
| TCGA-5B-A90C | 3.2932 | 0.0000 | 4.6235 | 1.9441 | 3.5009 | 0.7013 | low  |
| TCGA-5S-A9Q8 | 0.8575 | 0.0000 | 4.3695 | 2.9520 | 2.0497 | 0.7189 | low  |
| TCGA-A5-A0VO | 2.3973 | 1.0000 | 3.8784 | 2.4659 | 3.0295 | 0.7855 | low  |
| TCGA-A5-A1OK | 2.5123 | 0.0000 | 3.4506 | 4.4593 | 3.3641 | 0.4090 | low  |
| TCGA-A5-A2K5 | 2.0603 | 0.0000 | 5.2433 | 0.6583 | 3.9396 | 0.8494 | low  |
| TCGA-A5-A2K7 | 2.9123 | 0.0000 | 3.1603 | 2.5009 | 4.0881 | 0.7471 | low  |
| TCGA-A5-A3LO | 2.1260 | 0.0000 | 4.9209 | 2.9884 | 2.5418 | 0.5536 | low  |
| TCGA-AJ-A23O | 0.8548 | 1.0000 | 3.5968 | 2.3785 | 3.9333 | 0.7189 | low  |
| TCGA-AJ-A2QK | 1.7616 | 0.0000 | 5.2066 | 3.2001 | 2.2435 | 0.5087 | low  |
| TCGA-AJ-A2QL | 1.6493 | 0.0000 | 4.5590 | 4.1561 | 1.8170 | 0.4731 | low  |
| TCGA-AJ-A2QO | 2.8630 | 1.0000 | 5.5489 | 1.1751 | 2.6584 | 0.8609 | low  |
| TCGA-AJ-A3BG | 1.5068 | 0.0000 | 5.4794 | 2.1403 | 4.3447 | 0.4377 | low  |
| TCGA-AJ-A3BI | 1.5753 | 0.0000 | 5.8558 | 2.1702 | 1.7660 | 0.6800 | low  |
| TCGA-AJ-A3BK | 2.8247 | 0.0000 | 5.8570 | 1.8412 | 2.6147 | 0.6361 | low  |

|              |         |        |        |        |        |        |     |
|--------------|---------|--------|--------|--------|--------|--------|-----|
| TCGA-AJ-A3NE | 1.7205  | 0.0000 | 4.6895 | 2.9325 | 2.8274 | 0.5642 | low |
| TCGA-AJ-A3NH | 0.0027  | 1.0000 | 4.3202 | 2.5700 | 2.5768 | 0.7434 | low |
| TCGA-AJ-A3OK | 1.3288  | 0.0000 | 6.6641 | 2.0711 | 2.3430 | 0.5040 | low |
| TCGA-AJ-A3OL | 1.2301  | 1.0000 | 3.3682 | 1.7525 | 4.0321 | 0.9289 | low |
| TCGA-AJ-A5DV | 1.8603  | 0.0000 | 3.2536 | 3.1206 | 2.9007 | 0.7569 | low |
| TCGA-AJ-A5DW | 1.0685  | 0.0000 | 3.9376 | 3.2464 | 1.7840 | 0.7687 | low |
| TCGA-AJ-A8CV | 2.9260  | 0.0000 | 4.0256 | 2.8479 | 3.6795 | 0.5763 | low |
| TCGA-AJ-A8CW | 0.0110  | 0.0000 | 5.7258 | 3.1173 | 3.1664 | 0.3756 | low |
| TCGA-AP-A05O | 1.0521  | 0.0000 | 4.3788 | 2.2047 | 2.4361 | 0.8565 | low |
| TCGA-AP-A1DP | 2.9616  | 1.0000 | 4.5694 | 3.4566 | 3.8117 | 0.3935 | low |
| TCGA-AP-A1DQ | 3.8986  | 1.0000 | 3.3403 | 2.3658 | 3.8370 | 0.7881 | low |
| TCGA-AP-A1E0 | 5.0192  | 0.0000 | 4.2278 | 3.6923 | 0.6663 | 0.7743 | low |
| TCGA-AP-A1E1 | 3.8219  | 0.0000 | 5.2394 | 2.5756 | 3.6686 | 0.4626 | low |
| TCGA-AP-A5FX | 3.0110  | 1.0000 | 5.9821 | 2.4777 | 1.6009 | 0.6124 | low |
| TCGA-AW-A1PO | 0.0466  | 0.0000 | 6.3004 | 0.4781 | 3.6085 | 0.7364 | low |
| TCGA-AX-A06H | 2.2822  | 0.0000 | 4.0733 | 1.9346 | 3.0843 | 0.8875 | low |
| TCGA-AX-A1C4 | 1.1068  | 0.0000 | 4.0674 | 2.6786 | 4.9763 | 0.4588 | low |
| TCGA-AX-A1C5 | 2.7425  | 0.0000 | 3.1899 | 4.0189 | 1.5000 | 0.7589 | low |
| TCGA-AX-A1CF | 6.4027  | 0.0000 | 6.2085 | 1.4391 | 2.6616 | 0.6608 | low |
| TCGA-AX-A1CI | 7.1233  | 0.0000 | 4.5939 | 2.5229 | 3.1621 | 0.6211 | low |
| TCGA-AX-A1CK | 6.6877  | 0.0000 | 3.9274 | 2.9584 | 2.8631 | 0.6771 | low |
| TCGA-AX-A2H8 | 5.0986  | 0.0000 | 3.7164 | 2.5111 | 3.9367 | 0.6650 | low |
| TCGA-AX-A2HA | 6.7808  | 0.0000 | 5.2144 | 2.1072 | 2.6885 | 0.6751 | low |
| TCGA-AX-A2HD | 3.8740  | 0.0000 | 4.4302 | 3.6884 | 4.0769 | 0.3558 | low |
| TCGA-AX-A3G4 | 0.0247  | 0.0000 | 4.3931 | 2.4488 | 1.8047 | 0.8967 | low |
| TCGA-AX-A3GB | 1.2055  | 0.0000 | 4.4849 | 2.8052 | 2.1206 | 0.7231 | low |
| TCGA-B5-A11F | 15.4822 | 0.0000 | 4.0295 | 4.5075 | 1.5685 | 0.5069 | low |
| TCGA-B5-A11G | 9.4466  | 0.0000 | 6.2343 | 3.5176 | 2.7690 | 0.3115 | low |
| TCGA-B5-A11J | 4.5370  | 0.0000 | 5.6135 | 2.4275 | 2.8987 | 0.5204 | low |
| TCGA-B5-A11N | 5.1397  | 0.0000 | 3.9920 | 2.4107 | 2.6177 | 0.8485 | low |
| TCGA-B5-A11O | 7.1479  | 0.0000 | 3.8795 | 2.0147 | 3.2894 | 0.8691 | low |
| TCGA-B5-A11Q | 2.6740  | 0.0000 | 5.6176 | 2.8922 | 3.5301 | 0.3867 | low |
| TCGA-B5-A11R | 6.4356  | 0.0000 | 3.7879 | 2.6686 | 3.1583 | 0.7293 | low |
| TCGA-B5-A11S | 6.1068  | 0.0000 | 4.8458 | 3.4647 | 2.6616 | 0.4664 | low |
| TCGA-B5-A11V | 1.6301  | 0.0000 | 4.7643 | 3.7392 | 3.3197 | 0.3764 | low |
| TCGA-B5-A11W | 1.6247  | 0.0000 | 5.8602 | 2.2011 | 3.2320 | 0.4918 | low |
| TCGA-B5-A11Z | 1.4466  | 0.0000 | 3.1268 | 3.9204 | 3.0834 | 0.5699 | low |
| TCGA-B5-A121 | 1.3808  | 0.0000 | 3.8100 | 2.6376 | 3.2324 | 0.7215 | low |
| TCGA-B5-A1MW | 1.2247  | 0.0000 | 5.5568 | 2.0249 | 1.6950 | 0.7850 | low |
| TCGA-B5-A3F9 | 11.3836 | 0.0000 | 4.3451 | 3.4836 | 2.3141 | 0.5686 | low |
| TCGA-B5-A3FB | 7.7918  | 0.0000 | 5.1539 | 3.5023 | 2.5247 | 0.4373 | low |
| TCGA-B5-A3S1 | 2.4712  | 0.0000 | 3.4730 | 1.8861 | 3.8277 | 0.9012 | low |
| TCGA-B5-A5OC | 3.4219  | 0.0000 | 3.7498 | 2.5649 | 3.6886 | 0.6821 | low |
| TCGA-BG-A0MA | 0.8932  | 1.0000 | 3.1259 | 3.4379 | 3.0194 | 0.6833 | low |

|              |        |        |        |        |        |        |     |
|--------------|--------|--------|--------|--------|--------|--------|-----|
| TCGA-BG-A0MH | 5.2877 | 0.0000 | 4.0222 | 2.0773 | 2.7052 | 0.9278 | low |
| TCGA-BG-A0VV | 4.2548 | 0.0000 | 5.6204 | 2.7684 | 2.7389 | 0.4774 | low |
| TCGA-BG-A0VW | 4.3342 | 0.0000 | 4.7261 | 1.7469 | 3.3525 | 0.7546 | low |
| TCGA-BG-A0VX | 2.8575 | 0.0000 | 3.5865 | 3.5274 | 2.0001 | 0.7297 | low |
| TCGA-BG-A0VZ | 4.3863 | 0.0000 | 6.1106 | 3.6766 | 2.3510 | 0.3327 | low |
| TCGA-BG-A0W1 | 0.3342 | 0.0000 | 6.9092 | 3.4636 | 2.6297 | 0.2741 | low |
| TCGA-BG-A0W2 | 4.7151 | 0.0000 | 3.5352 | 3.2521 | 1.8250 | 0.8448 | low |
| TCGA-BG-A0YU | 1.2356 | 0.0000 | 5.0920 | 4.2302 | 3.2302 | 0.2970 | low |
| TCGA-BG-A187 | 1.2274 | 0.0000 | 5.2423 | 3.8455 | 2.2803 | 0.3995 | low |
| TCGA-BG-A18A | 1.1671 | 0.0000 | 4.0953 | 3.5096 | 2.7798 | 0.5446 | low |
| TCGA-BG-A18B | 1.2877 | 0.0000 | 6.5294 | 4.3346 | 4.3360 | 0.1555 | low |
| TCGA-BG-A18C | 1.2877 | 0.0000 | 4.9619 | 3.9810 | 1.8237 | 0.4520 | low |
| TCGA-BG-A220 | 1.1890 | 0.0000 | 4.2610 | 3.2794 | 4.6954 | 0.3758 | low |
| TCGA-BG-A222 | 0.7973 | 0.0000 | 2.0846 | 3.6285 | 4.4837 | 0.6145 | low |
| TCGA-BG-A2AD | 1.6685 | 0.0000 | 6.3900 | 1.7255 | 2.4828 | 0.5926 | low |
| TCGA-BG-A2AE | 1.9753 | 0.0000 | 4.1139 | 3.0925 | 4.4030 | 0.4435 | low |
| TCGA-BK-A0CA | 2.9151 | 0.0000 | 3.9079 | 3.2473 | 4.1842 | 0.4646 | low |
| TCGA-BK-A13B | 2.6466 | 0.0000 | 3.8052 | 2.5757 | 3.0715 | 0.7638 | low |
| TCGA-BK-A13C | 2.0822 | 0.0000 | 4.4989 | 3.5543 | 2.2650 | 0.5385 | low |
| TCGA-BK-A4ZD | 1.3863 | 0.0000 | 5.0182 | 4.3503 | 3.6788 | 0.2639 | low |
| TCGA-BK-A56F | 1.0986 | 0.0000 | 5.3438 | 3.2567 | 3.6102 | 0.3597 | low |
| TCGA-BK-A6W4 | 0.8219 | 0.0000 | 4.4360 | 3.5657 | 2.9377 | 0.4725 | low |
| TCGA-BS-A0UA | 9.5753 | 0.0000 | 6.5187 | 2.3350 | 4.6091 | 0.2948 | low |
| TCGA-BS-A0UL | 6.7973 | 0.0000 | 4.5803 | 2.6110 | 2.5592 | 0.6873 | low |
| TCGA-BS-A0V6 | 7.4658 | 0.0000 | 4.3082 | 2.8083 | 3.9136 | 0.5164 | low |
| TCGA-BS-A0V7 | 5.2986 | 0.0000 | 5.1906 | 2.1532 | 1.9012 | 0.7906 | low |
| TCGA-D1-A0ZO | 1.6493 | 0.0000 | 5.1275 | 3.4973 | 3.3960 | 0.3664 | low |
| TCGA-D1-A0ZP | 2.4959 | 0.0000 | 3.4858 | 3.2602 | 1.9466 | 0.8315 | low |
| TCGA-D1-A0ZR | 0.0466 | 0.0000 | 5.7357 | 3.3566 | 3.1075 | 0.3491 | low |
| TCGA-D1-A0ZU | 2.3890 | 0.0000 | 5.1011 | 3.7456 | 3.8134 | 0.3097 | low |
| TCGA-D1-A101 | 0.1452 | 0.0000 | 4.0935 | 2.4437 | 2.7194 | 0.7994 | low |
| TCGA-D1-A102 | 0.3699 | 0.0000 | 3.7091 | 3.5492 | 2.5364 | 0.6257 | low |
| TCGA-D1-A103 | 1.8329 | 0.0000 | 3.8154 | 2.9579 | 2.9912 | 0.6785 | low |
| TCGA-D1-A15W | 2.5068 | 0.0000 | 4.8579 | 2.2048 | 3.2095 | 0.6410 | low |
| TCGA-D1-A15Z | 0.1589 | 1.0000 | 3.8604 | 2.9087 | 2.3766 | 0.7775 | low |
| TCGA-D1-A162 | 3.1370 | 0.0000 | 5.7853 | 3.4034 | 3.2533 | 0.3287 | low |
| TCGA-D1-A165 | 0.0548 | 0.0000 | 5.7623 | 4.0314 | 2.9608 | 0.2829 | low |
| TCGA-D1-A167 | 1.3096 | 0.0000 | 4.6973 | 3.8088 | 3.6727 | 0.3468 | low |
| TCGA-D1-A169 | 3.1096 | 0.0000 | 5.8513 | 4.1775 | 2.2714 | 0.3043 | low |
| TCGA-D1-A16E | 3.0658 | 0.0000 | 4.6523 | 1.5964 | 3.5855 | 0.7714 | low |
| TCGA-D1-A16N | 2.5890 | 0.0000 | 5.4786 | 4.8412 | 0.7396 | 0.3689 | low |
| TCGA-D1-A16O | 2.8027 | 0.0000 | 6.0459 | 3.5367 | 4.7308 | 0.2140 | low |
| TCGA-D1-A16R | 0.0575 | 0.0000 | 3.5787 | 2.9513 | 3.0007 | 0.7219 | low |

|              |        |        |        |        |        |        |     |
|--------------|--------|--------|--------|--------|--------|--------|-----|
| TCGA-D1-A16V | 0.3288 | 1.0000 | 5.0653 | 3.1422 | 0.3887 | 0.7993 | low |
| TCGA-D1-A176 | 2.5123 | 0.0000 | 5.9157 | 2.8278 | 2.5880 | 0.4471 | low |
| TCGA-D1-A177 | 1.5014 | 0.0000 | 4.7291 | 0.2947 | 5.1721 | 0.8479 | low |
| TCGA-D1-A17A | 0.1315 | 0.0000 | 3.9857 | 4.3222 | 1.5728 | 0.5463 | low |
| TCGA-D1-A17B | 0.5836 | 0.0000 | 5.7000 | 3.8502 | 1.9689 | 0.3782 | low |
| TCGA-D1-A17F | 0.1068 | 0.0000 | 4.3419 | 2.0351 | 3.6416 | 0.7096 | low |
| TCGA-D1-A17H | 2.3342 | 0.0000 | 4.4758 | 2.3840 | 3.7985 | 0.5870 | low |
| TCGA-D1-A17L | 2.1973 | 0.0000 | 5.5704 | 2.6873 | 3.2944 | 0.4420 | low |
| TCGA-D1-A17Q | 0.1479 | 0.0000 | 6.5559 | 4.5547 | 3.2357 | 0.1808 | low |
| TCGA-D1-A17S | 2.0247 | 0.0000 | 5.1680 | 2.5389 | 2.0377 | 0.6755 | low |
| TCGA-D1-A17T | 0.1945 | 0.0000 | 4.4269 | 2.1207 | 3.1331 | 0.7508 | low |
| TCGA-D1-A1NS | 0.1178 | 0.0000 | 4.6101 | 2.7832 | 3.9657 | 0.4761 | low |
| TCGA-D1-A1NY | 1.4055 | 0.0000 | 3.8749 | 2.7828 | 4.2753 | 0.5401 | low |
| TCGA-D1-A1O5 | 1.2548 | 0.0000 | 6.1123 | 3.9650 | 1.6899 | 0.3463 | low |
| TCGA-D1-A1O7 | 0.0877 | 0.0000 | 4.5359 | 2.1013 | 3.7276 | 0.6473 | low |
| TCGA-D1-A2G5 | 3.9863 | 0.0000 | 5.1491 | 2.9398 | 3.9967 | 0.3892 | low |
| TCGA-D1-A3DH | 1.5699 | 0.0000 | 4.8805 | 2.4611 | 2.6413 | 0.6579 | low |
| TCGA-DF-A2KR | 5.1096 | 0.0000 | 5.7360 | 2.4260 | 3.0894 | 0.4842 | low |
| TCGA-DF-A2KV | 7.4438 | 0.0000 | 5.2169 | 1.5075 | 4.8939 | 0.5197 | low |
| TCGA-DI-A1BY | 3.0521 | 0.0000 | 4.4040 | 1.5807 | 3.2981 | 0.8797 | low |
| TCGA-E6-A1LX | 1.9479 | 0.0000 | 3.7813 | 3.1064 | 3.6672 | 0.5630 | low |
| TCGA-EC-A1NJ | 1.3370 | 0.0000 | 5.0531 | 2.4427 | 2.7235 | 0.6220 | low |
| TCGA-EC-A24G | 1.4000 | 0.0000 | 6.1620 | 3.2214 | 4.1814 | 0.2605 | low |
| TCGA-EO-A1Y7 | 4.0959 | 0.0000 | 6.9160 | 2.2611 | 1.4070 | 0.5392 | low |
| TCGA-EO-A22U | 3.8548 | 0.0000 | 3.1409 | 3.7161 | 1.7482 | 0.8100 | low |
| TCGA-EO-A22X | 4.8000 | 0.0000 | 4.3065 | 2.6233 | 3.9655 | 0.5449 | low |
| TCGA-EO-A22Y | 4.2932 | 0.0000 | 4.5072 | 2.0713 | 3.1551 | 0.7444 | low |
| TCGA-EO-A2CG | 4.2849 | 0.0000 | 3.3897 | 2.4317 | 3.0086 | 0.9070 | low |
| TCGA-EO-A3AS | 2.8658 | 0.0000 | 4.0783 | 1.8176 | 3.8196 | 0.7894 | low |
| TCGA-EO-A3AU | 4.2274 | 0.0000 | 4.8854 | 1.5069 | 3.8689 | 0.7049 | low |
| TCGA-EO-A3B0 | 3.8685 | 0.0000 | 4.9931 | 2.6943 | 1.7767 | 0.7082 | low |
| TCGA-EO-A3KX | 3.2055 | 0.0000 | 5.0726 | 2.5989 | 3.9974 | 0.4469 | low |
| TCGA-EO-A3L0 | 4.2575 | 0.0000 | 5.1769 | 2.8808 | 2.4713 | 0.5457 | low |
| TCGA-EY-A1GC | 4.5123 | 0.0000 | 5.2994 | 1.9220 | 1.3648 | 0.9335 | low |
| TCGA-EY-A1GD | 4.4904 | 0.0000 | 3.1746 | 5.7990 | 2.1258 | 0.3592 | low |
| TCGA-EY-A1GF | 2.2630 | 0.0000 | 4.2019 | 3.0010 | 4.3763 | 0.4499 | low |
| TCGA-EY-A1GH | 1.9452 | 0.0000 | 3.6867 | 4.2855 | 4.7935 | 0.3014 | low |
| TCGA-EY-A1GI | 1.9452 | 0.0000 | 4.1480 | 2.7828 | 2.3860 | 0.7520 | low |
| TCGA-EY-A1GT | 1.3425 | 0.0000 | 4.6400 | 2.2848 | 3.4847 | 0.6224 | low |
| TCGA-EY-A1GU | 2.7315 | 1.0000 | 4.3446 | 2.1947 | 3.0791 | 0.7562 | low |
| TCGA-EY-A214 | 1.2000 | 0.0000 | 5.8172 | 3.0753 | 1.5311 | 0.5271 | low |
| TCGA-EY-A2OP | 2.5863 | 0.0000 | 5.5039 | 2.8041 | 1.6940 | 0.6072 | low |
| TCGA-EY-A2OQ | 2.4247 | 0.0000 | 4.7343 | 3.0231 | 2.8961 | 0.5325 | low |
| TCGA-EY-A3QX | 2.7096 | 1.0000 | 4.8149 | 0.9059 | 3.9848 | 0.8633 | low |

|              |        |        |        |        |        |        |     |
|--------------|--------|--------|--------|--------|--------|--------|-----|
| TCGA-EY-A547 | 1.4932 | 0.0000 | 5.9009 | 1.8011 | 2.7018 | 0.6260 | low |
| TCGA-EY-A548 | 1.1781 | 0.0000 | 6.0254 | 3.1210 | 2.9374 | 0.3643 | low |
| TCGA-EY-A549 | 1.6575 | 0.0000 | 4.4131 | 3.9643 | 3.3282 | 0.3808 | low |
| TCGA-EY-A5W2 | 1.4137 | 0.0000 | 5.4910 | 1.9276 | 4.6145 | 0.4437 | low |
| TCGA-FI-A2D4 | 0.6658 | 1.0000 | 5.1167 | 3.1529 | 0.9443 | 0.6980 | low |
| TCGA-FI-A2F4 | 6.1096 | 0.0000 | 5.8916 | 2.1473 | 3.5671 | 0.4627 | low |
| TCGA-PG-A916 | 1.4301 | 0.0000 | 6.1973 | 3.2273 | 3.2214 | 0.3159 | low |
| TCGA-PG-A917 | 0.5808 | 0.0000 | 4.7247 | 2.8492 | 1.6522 | 0.7391 | low |
| TCGA-QF-A5YS | 1.8877 | 0.0000 | 4.4822 | 1.5992 | 2.9976 | 0.9130 | low |
| TCGA-QF-A5YT | 3.3288 | 0.0000 | 4.8599 | 2.3863 | 2.1609 | 0.7520 | low |
| TCGA-QS-A5YQ | 2.0795 | 0.0000 | 4.9317 | 2.3395 | 2.2204 | 0.7407 | low |
| TCGA-QS-A5YR | 1.9699 | 0.0000 | 5.2436 | 2.0903 | 3.0931 | 0.6183 | low |
| TCGA-SJ-A6ZI | 1.7288 | 0.0000 | 4.5633 | 2.7575 | 3.8847 | 0.4948 | low |
| TCGA-SJ-A6ZJ | 1.5233 | 0.0000 | 4.3367 | 2.5236 | 2.2325 | 0.8094 | low |
| TCGA-SL-A6JA | 0.0192 | 0.0000 | 5.6598 | 1.7253 | 3.4071 | 0.5890 | low |
