# Supplementary material for: Comprehensive Analysis of GDF10 Methylation Site-Associated Genes as Prognostic Markers for Endometrial Cancer
Source: Hindawi journal article supplement (doi:10.1155/2022/7117083), 2022-10-10
Supplement: f1 [file 7117083.f1.zip]

| sym     | logFC   | AveExpr | P.Value  | adj.P.Val | direction |
|---------|---------|---------|----------|-----------|-----------|
| SFN     | 4.44651 | 6.24188 | 2.27E-41 | 7.39E-40  | up        |
| PRAME   | 4.18655 | 5.61342 | 8.52E-69 | 1.06E-66  | up        |
| MYBL2   | 4.10161 | 4.7251  | 3.03E-74 | 4.77E-72  | up        |
| UBE2C   | 4.06901 | 5.41418 | 9.49E-70 | 1.24E-67  | up        |
| CDC20   | 3.91155 | 5.05006 | 3.51E-78 | 7.35E-76  | up        |
| AQP5    | 3.41182 | 5.03457 | 3.88E-18 | 3.59E-17  | up        |
| PRSS8   | 3.40318 | 6.14769 | 1.96E-49 | 9.81E-48  | up        |
| TK1     | 3.38706 | 5.33633 | 1.06E-75 | 1.87E-73  | up        |
| PI3     | 3.36068 | 4.10456 | 8.23E-14 | 5.48E-13  | up        |
| TPX2    | 3.31175 | 4.23489 | 4.95E-59 | 3.98E-57  | up        |
| ASF1B   | 3.20888 | 4.18118 | 5.83E-72 | 8.45E-70  | up        |
| KRT8    | 3.20528 | 7.66641 | 8.97E-51 | 4.81E-49  | up        |
| SDC1    | 3.17532 | 5.307   | 4.89E-47 | 2.08E-45  | up        |
| EPCAM   | 3.16581 | 7.45711 | 5.92E-52 | 3.34E-50  | up        |
| WFDC2   | 3.15698 | 9.73168 | 4.79E-16 | 3.82E-15  | up        |
| BIRC5   | 3.10852 | 3.71717 | 1.53E-56 | 1.09E-54  | up        |
| AURKB   | 3.03605 | 3.65929 | 1.93E-61 | 1.73E-59  | up        |
| SPP1    | 3.00643 | 6.04265 | 1.27E-23 | 1.69E-22  | up        |
| TOP2A   | 3.00191 | 3.95452 | 8.74E-49 | 4.14E-47  | up        |
| ST14    | 2.98827 | 6.29176 | 7.77E-55 | 5.07E-53  | up        |
| PTTG1   | 2.98583 | 4.19463 | 2.91E-53 | 1.74E-51  | up        |
| ZWINT   | 2.97727 | 4.32032 | 6.93E-65 | 7.19E-63  | up        |
| CLDN3   | 2.94916 | 7.67434 | 6.05E-25 | 8.69E-24  | up        |
| LAD1    | 2.899   | 5.27901 | 7.31E-36 | 1.86E-34  | up        |
| KIFC1   | 2.89238 | 3.86948 | 3.54E-55 | 2.34E-53  | up        |
| SLPI    | 2.88075 | 9.27341 | 2.69E-12 | 1.58E-11  | up        |
| TMPRSS4 | 2.82778 | 3.33229 | 3.18E-31 | 6.53E-30  | up        |
| CLDN7   | 2.81913 | 5.72585 | 7.45E-46 | 2.98E-44  | up        |
| SERINC2 | 2.81784 | 6.43638 | 1.48E-28 | 2.62E-27  | up        |
| CLDN4   | 2.79929 | 6.10603 | 3.35E-34 | 7.82E-33  | up        |
| SPINT1  | 2.79187 | 6.18886 | 6.47E-48 | 2.93E-46  | up        |
| CCNB1   | 2.78003 | 4.78748 | 2.48E-58 | 1.93E-56  | up        |
| CKS2    | 2.77704 | 6.0979  | 1.29E-62 | 1.23E-60  | up        |
| CCNB2   | 2.7712  | 3.58735 | 1.61E-61 | 1.45E-59  | up        |
| S100A9  | 2.77024 | 5.44912 | 6.06E-12 | 3.45E-11  | up        |
| KRT18   | 2.74907 | 7.74876 | 5.93E-41 | 1.90E-39  | up        |
| AP1M2   | 2.74183 | 5.87663 | 4.38E-49 | 2.12E-47  | up        |
| RRM2    | 2.72241 | 3.26474 | 3.34E-46 | 1.36E-44  | up        |
| DLX5    | 2.71569 | 5.31716 | 6.32E-14 | 4.23E-13  | up        |
| S100A2  | 2.69264 | 3.58741 | 3.98E-18 | 3.67E-17  | up        |
| UBE2T   | 2.68859 | 4.37632 | 2.32E-57 | 1.75E-55  | up        |
| CDCA8   | 2.67642 | 3.47098 | 4.28E-53 | 2.53E-51  | up        |
| CD24    | 2.67434 | 7.91332 | 1.11E-35 | 2.80E-34  | up        |
| GDF15   | 2.65876 | 4.78714 | 2.74E-21 | 3.17E-20  | up        |



|         |         |         |          |          |    |
|---------|---------|---------|----------|----------|----|
| CENPF   | 2.37076 | 2.95734 | 3.45E-41 | 1.11E-39 | up |
| POC1A   | 2.34082 | 3.22818 | 3.29E-58 | 2.55E-56 | up |
| FAM83D  | 2.34073 | 2.82744 | 6.52E-35 | 1.58E-33 | up |
| FAM83H  | 2.34024 | 4.44326 | 2.85E-55 | 1.91E-53 | up |
| ESPN    | 2.339   | 3.71524 | 7.46E-21 | 8.41E-20 | up |
| HMGA1   | 2.33789 | 6.69344 | 1.56E-28 | 2.77E-27 | up |
| AOC1    | 2.33594 | 2.65896 | 4.72E-09 | 2.07E-08 | up |
| PKP3    | 2.33391 | 4.43627 | 5.91E-36 | 1.51E-34 | up |
| HJURP   | 2.33261 | 2.67064 | 3.14E-49 | 1.54E-47 | up |
| CBLC    | 2.33162 | 4.1439  | 1.48E-30 | 2.93E-29 | up |
| CDC45   | 2.29906 | 2.63212 | 5.43E-50 | 2.80E-48 | up |
| HES6    | 2.29753 | 4.51175 | 1.07E-21 | 1.27E-20 | up |
| RDH10   | 2.29278 | 4.22018 | 6.06E-20 | 6.36E-19 | up |
| HGD     | 2.28909 | 3.46507 | 6.51E-15 | 4.72E-14 | up |
| CDKN2A  | 2.28828 | 2.74697 | 2.31E-14 | 1.60E-13 | up |
| CDH1    | 2.28535 | 5.48256 | 2.25E-31 | 4.66E-30 | up |
| VTCN1   | 2.27902 | 4.43969 | 4.73E-12 | 2.73E-11 | up |
| NCAPH   | 2.2765  | 2.6596  | 2.23E-47 | 9.75E-46 | up |
| CDK1    | 2.27133 | 3.49103 | 5.71E-37 | 1.53E-35 | up |
| DLGAP5  | 2.26654 | 2.5753  | 1.91E-38 | 5.53E-37 | up |
| CXCL17  | 2.26375 | 3.87388 | 3.08E-07 | 1.11E-06 | up |
| ALDH3B1 | 2.25503 | 3.49199 | 3.13E-16 | 2.53E-15 | up |
| SCGB2A  | 2.25063 | 7.67599 | 2.31E-05 | 6.72E-05 | up |
| MISP    | 2.24751 | 3.90199 | 3.13E-18 | 2.90E-17 | up |
| PRR15L  | 2.24736 | 4.17111 | 2.07E-22 | 2.57E-21 | up |
| PYCR1   | 2.24443 | 4.63084 | 1.84E-34 | 4.38E-33 | up |
| JSRP1   | 2.24    | 2.5494  | 3.82E-16 | 3.07E-15 | up |
| NUP210  | 2.23791 | 3.94329 | 1.47E-48 | 6.93E-47 | up |
| PSAT1   | 2.22591 | 4.92556 | 3.05E-20 | 3.28E-19 | up |
| SPAG5   | 2.22485 | 2.98421 | 2.85E-49 | 1.41E-47 | up |
| UCP2    | 2.22377 | 6.66866 | 3.81E-30 | 7.35E-29 | up |
| PAFAH1I | 2.22232 | 5.85477 | 1.55E-48 | 7.30E-47 | up |
| SPINT2  | 2.22097 | 6.82134 | 6.50E-40 | 2.00E-38 | up |
| MUC1    | 2.22036 | 6.42018 | 8.01E-15 | 5.76E-14 | up |
| E2F1    | 2.21731 | 3.33361 | 3.51E-32 | 7.50E-31 | up |
| TFAP2A  | 2.20639 | 2.27879 | 7.27E-27 | 1.18E-25 | up |
| RECQL4  | 2.20507 | 3.39657 | 3.82E-42 | 1.29E-40 | up |
| PAX8    | 2.19436 | 5.41355 | 7.66E-18 | 6.91E-17 | up |
| ESRP1   | 2.19203 | 4.19351 | 5.19E-37 | 1.40E-35 | up |
| AURKA   | 2.18485 | 2.91283 | 6.28E-39 | 1.85E-37 | up |
| PKMYT1  | 2.18199 | 2.42506 | 2.26E-47 | 9.88E-46 | up |
| PODXL2  | 2.17858 | 5.10057 | 1.99E-28 | 3.50E-27 | up |
| PHLDA2  | 2.17397 | 3.61326 | 1.03E-18 | 9.83E-18 | up |
| CENPA   | 2.17352 | 2.4477  | 9.37E-41 | 2.96E-39 | up |
| CCNA2   | 2.17248 | 3.2021  | 4.68E-37 | 1.27E-35 | up |







|         |         |         |          |          |    |
|---------|---------|---------|----------|----------|----|
| PNP     | 1.72602 | 4.03873 | 2.97E-34 | 6.97E-33 | up |
| MESP1   | 1.72359 | 1.93783 | 8.46E-13 | 5.18E-12 | up |
| MCM2    | 1.72295 | 4.1415  | 1.11E-24 | 1.56E-23 | up |
| TSPAN1  | 1.72022 | 5.57009 | 5.37E-08 | 2.10E-07 | up |
| MCM4    | 1.72003 | 3.92351 | 2.28E-28 | 3.99E-27 | up |
| RAP1GA  | 1.71521 | 3.41315 | 8.30E-16 | 6.48E-15 | up |
| CLDN6   | 1.71413 | 1.78963 | 8.42E-05 | 0.00023  | up |
| SLC39A4 | 1.71223 | 3.66702 | 1.70E-22 | 2.12E-21 | up |
| CAMSAP  | 1.7092  | 3.31543 | 8.19E-38 | 2.30E-36 | up |
| RAD54L  | 1.70231 | 1.99838 | 5.86E-34 | 1.34E-32 | up |
| PROM2   | 1.69962 | 3.37622 | 2.37E-15 | 1.79E-14 | up |
| RNASEH  | 1.6996  | 4.65    | 4.03E-32 | 8.60E-31 | up |
| RBM47   | 1.69771 | 3.57345 | 1.29E-27 | 2.19E-26 | up |
| SLC2A1  | 1.69732 | 5.27448 | 3.02E-17 | 2.61E-16 | up |
| NME1    | 1.69391 | 4.64877 | 3.90E-41 | 1.25E-39 | up |
| GRIN2D  | 1.69307 | 1.79386 | 2.19E-13 | 1.40E-12 | up |
| BAIAP2L | 1.68928 | 3.55704 | 1.43E-47 | 6.35E-46 | up |
| SLC52A2 | 1.68663 | 5.00536 | 1.55E-46 | 6.43E-45 | up |
| KRT6A   | 1.68658 | 1.82003 | 2.02E-06 | 6.66E-06 | up |
| ESPL1   | 1.6862  | 1.87474 | 2.03E-33 | 4.55E-32 | up |
| ORC6    | 1.68454 | 2.10449 | 1.59E-41 | 5.21E-40 | up |
| RACGAP  | 1.68219 | 3.08636 | 4.86E-30 | 9.34E-29 | up |
| LPAR2   | 1.68109 | 3.62532 | 5.79E-36 | 1.48E-34 | up |
| GOLT1A  | 1.6808  | 2.55438 | 3.05E-13 | 1.93E-12 | up |
| FAM132F | 1.67758 | 1.81345 | 3.07E-13 | 1.94E-12 | up |
| MAP2K6  | 1.6751  | 2.6703  | 2.46E-18 | 2.31E-17 | up |
| CBX2    | 1.6679  | 2.63083 | 1.67E-19 | 1.70E-18 | up |
| CP      | 1.6654  | 3.75884 | 6.92E-07 | 2.41E-06 | up |
| NR2F6   | 1.66193 | 5.72584 | 2.59E-30 | 5.05E-29 | up |
| CDC25C  | 1.65633 | 1.81917 | 4.79E-39 | 1.41E-37 | up |
| ERBB3   | 1.65552 | 3.95757 | 1.03E-27 | 1.75E-26 | up |
| ENO1    | 1.6535  | 8.65396 | 9.86E-35 | 2.37E-33 | up |
| GAPDH   | 1.65344 | 10.1886 | 1.02E-39 | 3.10E-38 | up |
| TRIP13  | 1.6505  | 2.83759 | 2.43E-28 | 4.25E-27 | up |
| PRSS22  | 1.64541 | 3.03472 | 4.69E-14 | 3.18E-13 | up |
| ARHGEF  | 1.64414 | 2.773   | 1.77E-36 | 4.64E-35 | up |
| SLC29A2 | 1.64409 | 3.52139 | 1.09E-25 | 1.65E-24 | up |
| RPS6KA1 | 1.6428  | 3.97872 | 1.58E-45 | 6.20E-44 | up |
| F2RL1   | 1.63723 | 3.30486 | 8.35E-19 | 8.04E-18 | up |
| SLC34A2 | 1.63134 | 5.38583 | 5.36E-07 | 1.89E-06 | up |
| SYNE4   | 1.63106 | 3.1921  | 6.15E-27 | 1.00E-25 | up |
| S100P   | 1.63052 | 2.02774 | 2.50E-07 | 9.10E-07 | up |
| EFNA4   | 1.62619 | 4.43598 | 3.99E-31 | 8.13E-30 | up |
| CCNA1   | 1.62528 | 3.21066 | 1.06E-06 | 3.62E-06 | up |
| RCC2    | 1.62505 | 6.19721 | 1.20E-53 | 7.31E-52 | up |









|         |         |         |          |          |    |
|---------|---------|---------|----------|----------|----|
| AP2S1   | 1.42461 | 6.16378 | 5.98E-36 | 1.53E-34 | up |
| MDK     | 1.42299 | 8.3894  | 5.51E-12 | 3.16E-11 | up |
| ATP5J2  | 1.42154 | 5.8705  | 1.17E-36 | 3.12E-35 | up |
| SCX     | 1.42099 | 2.79718 | 1.27E-08 | 5.30E-08 | up |
| FUT2    | 1.42026 | 2.68606 | 7.13E-12 | 4.04E-11 | up |
| RGL3    | 1.41787 | 3.6246  | 3.01E-15 | 2.25E-14 | up |
| CXADR   | 1.41573 | 3.55095 | 6.20E-19 | 6.03E-18 | up |
| SLC4A11 | 1.415   | 2.29508 | 8.96E-12 | 5.03E-11 | up |
| MAD2L1  | 1.41494 | 2.34274 | 8.24E-21 | 9.26E-20 | up |
| HOXB13  | 1.41445 | 1.36038 | 6.66E-11 | 3.47E-10 | up |
| FANCI   | 1.41368 | 2.46612 | 8.99E-31 | 1.80E-29 | up |
| CXCL1   | 1.41355 | 2.66971 | 5.53E-05 | 0.00015  | up |
| REEP4   | 1.41231 | 4.27577 | 2.63E-32 | 5.64E-31 | up |
| HIST3H2 | 1.41023 | 4.23728 | 1.34E-12 | 8.08E-12 | up |
| COMTD1  | 1.40754 | 3.52525 | 9.42E-18 | 8.45E-17 | up |
| EXOSC4  | 1.4063  | 5.02198 | 4.56E-25 | 6.59E-24 | up |
| CCL18   | 1.40275 | 1.7789  | 2.30E-07 | 8.41E-07 | up |
| HIST1H2 | 1.40275 | 1.57668 | 5.14E-15 | 3.76E-14 | up |
| ST6GAL1 | 1.40117 | 3.37979 | 6.47E-07 | 2.26E-06 | up |
| GIPC1   | 1.40081 | 5.60816 | 5.45E-34 | 1.25E-32 | up |
| TXNDC1  | 1.39979 | 3.84642 | 1.38E-40 | 4.30E-39 | up |
| HOXB6   | 1.3971  | 4.28826 | 7.33E-06 | 2.27E-05 | up |
| PTPN6   | 1.39674 | 3.76487 | 2.68E-34 | 6.31E-33 | up |
| DEFB1   | 1.39672 | 4.43137 | 0.0011   | 0.00251  | up |
| NEK6    | 1.39501 | 3.76562 | 3.51E-27 | 5.82E-26 | up |
| DSG2    | 1.39442 | 4.17867 | 1.26E-16 | 1.05E-15 | up |
| OVOL2   | 1.3941  | 2.88724 | 1.69E-21 | 1.98E-20 | up |
| AGR2    | 1.39049 | 4.36272 | 0.0003   | 0.00075  | up |
| CENPW   | 1.38997 | 4.67357 | 1.99E-13 | 1.28E-12 | up |
| CDC42B1 | 1.38971 | 2.60209 | 2.15E-30 | 4.21E-29 | up |
| KCNH3   | 1.38962 | 2.48684 | 5.81E-08 | 2.27E-07 | up |
| LAMC2   | 1.38943 | 4.39495 | 2.62E-09 | 1.19E-08 | up |
| ENC1    | 1.3894  | 3.64973 | 3.31E-13 | 2.09E-12 | up |
| FAM195A | 1.38802 | 3.28533 | 3.72E-24 | 5.10E-23 | up |
| PPP1CA  | 1.38744 | 6.379   | 4.37E-46 | 1.77E-44 | up |
| IDH1    | 1.38713 | 4.8358  | 2.24E-16 | 1.83E-15 | up |
| SLC2A6  | 1.38546 | 2.24549 | 2.88E-22 | 3.54E-21 | up |
| MMP15   | 1.38508 | 4.35658 | 5.92E-22 | 7.15E-21 | up |
| RIPPLY3 | 1.38083 | 1.52841 | 1.27E-10 | 6.40E-10 | up |
| B4GALT1 | 1.37551 | 6.36778 | 1.20E-10 | 6.11E-10 | up |
| GJB2    | 1.3748  | 2.86916 | 7.77E-07 | 2.69E-06 | up |
| BOP1    | 1.37424 | 4.76233 | 9.99E-26 | 1.52E-24 | up |
| SAT1    | 1.37353 | 7.88023 | 9.95E-12 | 5.57E-11 | up |
| DNAJC22 | 1.37266 | 2.40934 | 6.46E-12 | 3.67E-11 | up |
| SCNN1B  | 1.37039 | 2.19162 | 7.01E-06 | 2.17E-05 | up |













|         |         |         |          |          |    |
|---------|---------|---------|----------|----------|----|
| PCCB    | 1.17159 | 3.07682 | 4.92E-28 | 8.52E-27 | up |
| SCGB2A2 | 1.17067 | 1.41933 | 0.00071  | 0.00168  | up |
| KAZALD  | 1.16993 | 3.0063  | 3.68E-08 | 1.46E-07 | up |
| BCL2L12 | 1.1691  | 3.63613 | 4.24E-24 | 5.81E-23 | up |
| VDR     | 1.16859 | 2.05038 | 1.55E-16 | 1.28E-15 | up |
| NCCRP1  | 1.16839 | 1.38803 | 7.98E-07 | 2.75E-06 | up |
| RAB20   | 1.16838 | 4.24818 | 8.16E-18 | 7.34E-17 | up |
| UBALD2  | 1.16817 | 5.34899 | 4.68E-21 | 5.34E-20 | up |
| GSTP1   | 1.16762 | 8.84315 | 1.40E-17 | 1.24E-16 | up |
| PSMB3   | 1.16676 | 7.10195 | 1.32E-21 | 1.56E-20 | up |
| PRKCD   | 1.16665 | 4.52605 | 3.93E-18 | 3.63E-17 | up |
| YIF1B   | 1.1643  | 4.19158 | 1.19E-27 | 2.03E-26 | up |
| NOXA1   | 1.16256 | 4.52254 | 2.87E-09 | 1.29E-08 | up |
| MANF    | 1.16212 | 5.54177 | 1.27E-19 | 1.31E-18 | up |
| LRG1    | 1.16162 | 3.47891 | 1.69E-05 | 4.99E-05 | up |
| TOMM40  | 1.16073 | 4.67209 | 1.55E-26 | 2.46E-25 | up |
| TGFA    | 1.16064 | 2.20862 | 4.45E-09 | 1.96E-08 | up |
| BRI3BP  | 1.15974 | 2.57349 | 4.37E-22 | 5.33E-21 | up |
| PAQR6   | 1.15839 | 1.87438 | 8.78E-14 | 5.84E-13 | up |
| YDJC    | 1.15746 | 4.61937 | 1.43E-22 | 1.80E-21 | up |
| AIFM1   | 1.15712 | 4.98507 | 1.04E-17 | 9.28E-17 | up |
| HOXB7   | 1.15711 | 4.47218 | 4.66E-06 | 1.48E-05 | up |
| SNRPF   | 1.15689 | 4.8031  | 9.54E-27 | 1.54E-25 | up |
| THEM6   | 1.15671 | 4.21917 | 5.13E-16 | 4.07E-15 | up |
| TMEM10  | 1.1557  | 2.89938 | 1.83E-21 | 2.14E-20 | up |
| TSPAN13 | 1.15447 | 5.13714 | 1.87E-10 | 9.31E-10 | up |
| SLC25A1 | 1.15333 | 2.04092 | 1.11E-50 | 5.93E-49 | up |
| PYCRL   | 1.15276 | 3.51763 | 1.62E-21 | 1.90E-20 | up |
| PLEKHG  | 1.15197 | 1.72421 | 6.29E-18 | 5.72E-17 | up |
| SLC19A1 | 1.15137 | 2.34082 | 2.22E-33 | 4.99E-32 | up |
| IL1RN   | 1.15115 | 1.74617 | 1.23E-09 | 5.71E-09 | up |
| CHCHD1  | 1.1493  | 5.0439  | 1.02E-11 | 5.70E-11 | up |
| FAAH    | 1.14913 | 3.78922 | 5.45E-14 | 3.67E-13 | up |
| PSME2   | 1.14906 | 5.68666 | 1.62E-16 | 1.34E-15 | up |
| RAB17   | 1.14878 | 2.84277 | 1.41E-15 | 1.08E-14 | up |
| GDA     | 1.14736 | 1.96299 | 8.63E-06 | 2.64E-05 | up |
| TMEM97  | 1.1435  | 3.93373 | 1.52E-15 | 1.16E-14 | up |
| NFE2L3  | 1.14159 | 2.77892 | 8.32E-10 | 3.93E-09 | up |
| USP18   | 1.14067 | 2.2934  | 5.15E-12 | 2.96E-11 | up |
| CEACAM  | 1.13845 | 1.51903 | 5.93E-05 | 0.00016  | up |
| DNMT1   | 1.13843 | 3.66265 | 1.70E-18 | 1.61E-17 | up |
| SEMA4A  | 1.1381  | 2.60371 | 1.04E-15 | 8.04E-15 | up |
| AKR1B1C | 1.13661 | 1.26492 | 0.00013  | 0.00034  | up |
| CTB-55O | 1.13601 | 2.45758 | 5.54E-12 | 3.17E-11 | up |
| HKDC1   | 1.13533 | 2.26062 | 8.40E-07 | 2.90E-06 | up |











|        |         |         |          |          |    |
|--------|---------|---------|----------|----------|----|
| CYP2D6 | 1.00048 | 1.43356 | 1.82E-10 | 9.04E-10 | up |
| MPDU1  | 1.00034 | 4.45026 | 7.55E-22 | 9.07E-21 | up |
