# Supplementary material for: Comprehensive Analysis of GDF10 Methylation Site-Associated Genes as Prognostic Markers for Endometrial Cancer
Source: Hindawi journal article supplement (doi:10.1155/2022/7117083), 2022-10-10
Supplement: f1 [file 7117083.f1.zip]

| sym       | logFC      | AveExpr    | P.Value   | adj.P.Val | direction |
|-----------|------------|------------|-----------|-----------|-----------|
| DES       | -6.6295224 | 2.99897898 | 3.08E-54  | 1.93E-52  | down      |
| MYH11     | -5.6381323 | 2.19126495 | 1.66E-75  | 2.87E-73  | down      |
| CNN1      | -5.564228  | 2.86773734 | 1.45E-64  | 1.47E-62  | down      |
| ACTG2     | -4.9111959 | 2.75064467 | 1.75E-50  | 9.28E-49  | down      |
| LMOD1     | -4.7988264 | 2.0529793  | 1.09E-86  | 3.46E-84  | down      |
| OGN       | -4.6541784 | 0.82412764 | 8.36E-119 | 1.50E-115 | down      |
| DPT       | -4.4273048 | 1.04616496 | 2.31E-99  | 1.34E-96  | down      |
| SPARCL1   | -4.3801293 | 4.68879831 | 8.27E-71  | 1.15E-68  | down      |
| ZCCHC12   | -4.3315396 | 1.3905076  | 8.85E-69  | 1.10E-66  | down      |
| SFRP4     | -4.2635941 | 3.45527023 | 4.95E-26  | 7.65E-25  | down      |
| ACTA2     | -4.2539146 | 5.33010091 | 8.72E-53  | 5.03E-51  | down      |
| C7        | -4.2013227 | 0.67167319 | 8.62E-105 | 7.08E-102 | down      |
| CCL21     | -4.1488455 | 2.81217019 | 1.56E-29  | 2.90E-28  | down      |
| PTGIS     | -4.1249081 | 1.19534336 | 2.23E-91  | 9.35E-89  | down      |
| TAGLN     | -4.1038195 | 4.83964412 | 3.21E-51  | 1.78E-49  | down      |
| PLN       | -4.0699044 | 1.07436937 | 1.48E-83  | 3.93E-81  | down      |
| FHL1      | -4.0597478 | 1.96585374 | 1.53E-82  | 3.81E-80  | down      |
| WT1       | -3.9853029 | 1.48050797 | 2.65E-55  | 1.78E-53  | down      |
| DCN       | -3.9376128 | 2.81980055 | 1.43E-60  | 1.23E-58  | down      |
| MRGPRF    | -3.9312323 | 2.0237471  | 2.81E-83  | 7.28E-81  | down      |
| MFAP4     | -3.9032507 | 3.29841314 | 4.54E-39  | 1.34E-37  | down      |
| RERG      | -3.8813596 | 1.11998935 | 2.70E-111 | 2.80E-108 | down      |
| PRELP     | -3.7976749 | 1.78262941 | 1.15E-66  | 1.31E-64  | down      |
| HSPB6     | -3.7799606 | 2.92788051 | 2.94E-44  | 1.08E-42  | down      |
| CHRD1     | -3.7595358 | 0.99625146 | 2.16E-75  | 3.70E-73  | down      |
| TNFAIP8L3 | -3.7475926 | 1.16463452 | 1.90E-91  | 8.16E-89  | down      |
| PGM5      | -3.74144   | 1.3818591  | 1.07E-77  | 2.23E-75  | down      |
| MYLK      | -3.7291174 | 1.97299388 | 3.80E-88  | 1.34E-85  | down      |
| GAS1      | -3.6914579 | 1.81877843 | 2.21E-56  | 1.56E-54  | down      |
| RSPO1     | -3.6748218 | 0.76349595 | 4.12E-112 | 4.51E-109 | down      |
| OSR2      | -3.6477188 | 2.60387937 | 4.69E-62  | 4.34E-60  | down      |
| SYNPO2    | -3.6070345 | 1.4091196  | 5.20E-90  | 2.09E-87  | down      |
| TCF23     | -3.5637414 | 0.54171729 | 1.78E-125 | 8.75E-122 | down      |
| FLNC      | -3.5615037 | 1.40253283 | 4.71E-69  | 5.96E-67  | down      |
| SDPR      | -3.5472019 | 1.52083247 | 2.05E-78  | 4.35E-76  | down      |
| MAOB      | -3.5290887 | 2.90559312 | 1.51E-46  | 6.29E-45  | down      |
| NDN       | -3.508885  | 2.52271783 | 9.63E-74  | 1.48E-71  | down      |
| C11orf96  | -3.5056694 | 2.79318614 | 2.06E-59  | 1.68E-57  | down      |
| MAMDC2    | -3.4986909 | 0.67807543 | 3.47E-124 | 1.14E-120 | down      |
| CXCL12    | -3.4859844 | 2.05629466 | 1.70E-59  | 1.40E-57  | down      |
| HSPB7     | -3.4805103 | 0.96039391 | 4.67E-99  | 2.63E-96  | down      |
| MYL9      | -3.4010709 | 5.65700371 | 4.15E-45  | 1.60E-43  | down      |
| APOD      | -3.3834288 | 2.49254132 | 1.30E-26  | 2.08E-25  | down      |
| LTBP4     | -3.3385096 | 3.61523994 | 1.80E-46  | 7.45E-45  | down      |

|          |            |            |           |                |
|----------|------------|------------|-----------|----------------|
| RAMP1    | -3.327669  | 4.21312456 | 4.00E-35  | 9.76E-34 down  |
| ADH1B    | -3.2899824 | 0.40906106 | 1.84E-115 | 2.41E-112 down |
| HAND2    | -3.2849401 | 1.13983516 | 1.86E-84  | 5.30E-82 down  |
| CLEC3B   | -3.2721337 | 1.43177653 | 1.88E-70  | 2.54E-68 down  |
| PPP1R12B | -3.2687364 | 1.46510484 | 5.09E-90  | 2.09E-87 down  |
| ITM2A    | -3.2134543 | 1.88390417 | 9.00E-57  | 6.50E-55 down  |
| PDLIM3   | -3.2056811 | 0.95023847 | 1.07E-79  | 2.38E-77 down  |
| ALDH1A2  | -3.1992857 | 1.33277741 | 5.90E-65  | 6.18E-63 down  |
| DUSP1    | -3.1885865 | 5.33559062 | 1.46E-44  | 5.52E-43 down  |
| PODN     | -3.1729396 | 1.60359429 | 6.81E-57  | 4.97E-55 down  |
| AOC3     | -3.1612321 | 1.52571527 | 2.91E-70  | 3.86E-68 down  |
| CAV1     | -3.150177  | 3.14749385 | 2.71E-67  | 3.22E-65 down  |
| EFEMP1   | -3.1471242 | 2.18197667 | 9.37E-45  | 3.59E-43 down  |
| TCEAL7   | -3.1309623 | 1.32768267 | 2.34E-74  | 3.75E-72 down  |
| SMOC2    | -3.1164206 | 3.23651681 | 8.54E-43  | 2.94E-41 down  |
| FOSB     | -3.1053914 | 1.96817506 | 2.07E-30  | 4.07E-29 down  |
| CHRD12   | -3.1036578 | 0.74308077 | 1.41E-56  | 1.01E-54 down  |
| SLC24A3  | -3.0628385 | 1.49898272 | 8.27E-76  | 1.47E-73 down  |
| ASPN     | -3.0593242 | 1.71383474 | 3.88E-39  | 1.15E-37 down  |
| BCHE     | -3.0556513 | 0.4948339  | 3.31E-110 | 3.26E-107 down |
| FBXO32   | -3.0485058 | 2.26841115 | 1.13E-64  | 1.17E-62 down  |
| MSRB3    | -3.0478774 | 1.57471179 | 5.84E-69  | 7.33E-67 down  |
| TNXB     | -3.0430978 | 0.6972988  | 2.97E-100 | 1.77E-97 down  |
| TMEM200B | -3.0257382 | 1.13966647 | 5.65E-77  | 1.08E-74 down  |
| KLF2     | -3.0152808 | 2.67756192 | 7.55E-62  | 6.91E-60 down  |
| TSPAN2   | -2.9805697 | 1.07612013 | 4.18E-75  | 7.04E-73 down  |
| RGS2     | -2.9700351 | 2.90434208 | 1.58E-42  | 5.43E-41 down  |
| IGFBP5   | -2.9621733 | 5.35165366 | 6.19E-25  | 8.88E-24 down  |
| ACKR1    | -2.9582672 | 2.43302022 | 2.13E-29  | 3.92E-28 down  |
| IGFBP6   | -2.9572595 | 3.13615534 | 3.37E-37  | 9.17E-36 down  |
| LEFTY2   | -2.9400814 | 1.53651138 | 5.53E-25  | 7.96E-24 down  |
| SFRP1    | -2.9367421 | 2.71211605 | 8.49E-29  | 1.52E-27 down  |
| PEG3     | -2.9331489 | 0.54795528 | 2.70E-102 | 1.77E-99 down  |
| CACNA1H  | -2.9274647 | 1.23477833 | 4.58E-76  | 8.44E-74 down  |
| CSDC2    | -2.9178732 | 1.17981568 | 1.17E-67  | 1.41E-65 down  |
| TGFB1I1  | -2.9084515 | 2.41461156 | 1.55E-62  | 1.47E-60 down  |
| PTRF     | -2.9010001 | 4.97024752 | 4.64E-61  | 4.10E-59 down  |
| RASL12   | -2.8969988 | 1.93329892 | 6.71E-71  | 9.52E-69 down  |
| TNS1     | -2.8967802 | 2.60661712 | 4.08E-72  | 6.14E-70 down  |
| CLMP     | -2.8864916 | 1.28063351 | 3.02E-76  | 5.62E-74 down  |
| KCTD12   | -2.8841599 | 3.04901773 | 2.16E-38  | 6.23E-37 down  |
| EMILIN1  | -2.8736271 | 3.54430738 | 1.58E-38  | 4.57E-37 down  |
| RPRM     | -2.8662685 | 1.05750398 | 1.67E-47  | 7.40E-46 down  |
| CYP1B1   | -2.8409282 | 1.55161525 | 5.71E-54  | 3.55E-52 down  |
| JPH2     | -2.8377872 | 0.73343893 | 4.42E-89  | 1.71E-86 down  |

|          |            |            |           |                |
|----------|------------|------------|-----------|----------------|
| GAS6     | -2.8368926 | 3.49578967 | 9.73E-38  | 2.72E-36 down  |
| LRRN4CL  | -2.8192005 | 1.37411802 | 1.54E-69  | 1.98E-67 down  |
| RSPO3    | -2.8186574 | 1.25937423 | 4.41E-35  | 1.07E-33 down  |
| CYBRD1   | -2.8141492 | 3.07530919 | 8.66E-54  | 5.32E-52 down  |
| JPH4     | -2.8087617 | 0.57232511 | 1.09E-113 | 1.34E-110 down |
| CLIP3    | -2.7940549 | 2.57228575 | 5.41E-50  | 2.79E-48 down  |
| MRVI1    | -2.7938075 | 1.57673362 | 3.24E-70  | 4.26E-68 down  |
| TGFBR3   | -2.785189  | 1.53084817 | 8.68E-66  | 9.40E-64 down  |
| CCDC80   | -2.7827459 | 2.3263868  | 1.29E-44  | 4.89E-43 down  |
| KCNMB1   | -2.7806767 | 0.92777709 | 4.84E-75  | 8.08E-73 down  |
| FOS      | -2.7772754 | 5.43413719 | 5.14E-22  | 6.25E-21 down  |
| EGR1     | -2.7720811 | 5.51297544 | 1.52E-28  | 2.69E-27 down  |
| FXVD6    | -2.7373589 | 1.98420234 | 1.82E-39  | 5.49E-38 down  |
| SORBS1   | -2.7199045 | 1.36680891 | 1.03E-74  | 1.68E-72 down  |
| CALD1    | -2.7150732 | 3.70499788 | 3.44E-53  | 2.05E-51 down  |
| CBX7     | -2.7101799 | 1.55277127 | 2.90E-104 | 2.28E-101 down |
| ANGPTL1  | -2.7073598 | 0.9610632  | 4.29E-47  | 1.84E-45 down  |
| ZCCHC24  | -2.6967652 | 1.95839499 | 4.80E-72  | 7.13E-70 down  |
| SLC22A3  | -2.693832  | 0.54135556 | 1.67E-97  | 9.16E-95 down  |
| TPM2     | -2.6834544 | 5.21579427 | 6.04E-33  | 1.34E-31 down  |
| TACC1    | -2.6708297 | 2.00625597 | 5.24E-72  | 7.65E-70 down  |
| BNC2     | -2.6627301 | 0.61487698 | 4.30E-116 | 6.52E-113 down |
| MASP1    | -2.6586628 | 0.50248179 | 5.16E-101 | 3.18E-98 down  |
| NEXN     | -2.6524362 | 1.0283952  | 4.45E-77  | 8.60E-75 down  |
| TCEAL2   | -2.648994  | 1.26513619 | 5.45E-27  | 8.94E-26 down  |
| PLSCR4   | -2.64591   | 1.18710973 | 1.90E-88  | 6.94E-86 down  |
| SRPX     | -2.6424259 | 1.39414237 | 2.72E-46  | 1.11E-44 down  |
| CYR61    | -2.6408244 | 5.36847744 | 1.19E-36  | 3.16E-35 down  |
| DACT3    | -2.6295802 | 0.95973875 | 8.44E-85  | 2.45E-82 down  |
| GATA6    | -2.6218261 | 1.01953432 | 7.95E-71  | 1.11E-68 down  |
| PMP22    | -2.6212363 | 3.11972628 | 2.51E-44  | 9.26E-43 down  |
| CSRP1    | -2.6184542 | 4.66659783 | 3.31E-82  | 8.06E-80 down  |
| KIAA1462 | -2.6012334 | 1.37328209 | 9.13E-92  | 4.09E-89 down  |
| OLFML3   | -2.6004225 | 3.68396474 | 5.32E-29  | 9.63E-28 down  |
| PTGER3   | -2.5991448 | 0.48348548 | 3.08E-72  | 4.67E-70 down  |
| EDNRA    | -2.5867362 | 1.8382873  | 4.51E-56  | 3.13E-54 down  |
| KANK2    | -2.5861363 | 3.77086207 | 5.41E-59  | 4.33E-57 down  |
| NCAM1    | -2.58592   | 0.93097343 | 4.25E-49  | 2.07E-47 down  |
| F10      | -2.5791794 | 1.12541557 | 2.44E-59  | 1.97E-57 down  |
| CES1     | -2.5773726 | 1.46295357 | 1.64E-20  | 1.79E-19 down  |
| SERPINF1 | -2.5553349 | 4.29170032 | 4.00E-28  | 6.96E-27 down  |
| KIAA1644 | -2.5541063 | 0.6984314  | 4.81E-72  | 7.13E-70 down  |
| ANTXR2   | -2.5418796 | 1.76946565 | 4.28E-65  | 4.52E-63 down  |
| PDK4     | -2.5397378 | 2.16861674 | 2.12E-38  | 6.13E-37 down  |
| GPR124   | -2.5330814 | 1.95486234 | 3.16E-51  | 1.75E-49 down  |

|          |            |            |           |                |
|----------|------------|------------|-----------|----------------|
| GSTM5    | -2.5329738 | 0.47413027 | 1.67E-140 | 1.65E-136 down |
| FILIP1L  | -2.5282292 | 2.18013976 | 2.32E-39  | 6.94E-38 down  |
| MAGEH1   | -2.5221001 | 2.63668708 | 1.31E-36  | 3.45E-35 down  |
| ABCG2    | -2.5151977 | 0.99075804 | 1.36E-69  | 1.76E-67 down  |
| GPRASP1  | -2.5013367 | 0.83718727 | 1.00E-122 | 2.82E-119 down |
| PRUNE2   | -2.4980227 | 0.80700182 | 5.68E-75  | 9.41E-73 down  |
| TSHZ3    | -2.4941947 | 1.12326801 | 4.55E-82  | 1.07E-79 down  |
| EHD2     | -2.4935838 | 3.5718294  | 5.24E-47  | 2.22E-45 down  |
| GYPC     | -2.4771871 | 2.07322613 | 1.05E-54  | 6.82E-53 down  |
| SERTM1   | -2.4768319 | 1.05996185 | 3.74E-49  | 1.82E-47 down  |
| PSD      | -2.4685624 | 1.54890592 | 1.69E-60  | 1.44E-58 down  |
| JAM2     | -2.4680435 | 1.30961098 | 6.21E-57  | 4.55E-55 down  |
| HSPB8    | -2.4679019 | 2.63280873 | 5.95E-27  | 9.72E-26 down  |
| CCND2    | -2.4607255 | 2.46258484 | 4.12E-31  | 8.37E-30 down  |
| JAM3     | -2.4455901 | 1.73191932 | 3.58E-66  | 3.93E-64 down  |
| PRNP     | -2.4445226 | 3.89181561 | 3.55E-31  | 7.25E-30 down  |
| KCNMA1   | -2.4440765 | 1.10393999 | 6.11E-61  | 5.36E-59 down  |
| ARMCX1   | -2.4417722 | 2.30178504 | 6.50E-32  | 1.38E-30 down  |
| MEIS3    | -2.4401269 | 1.24900854 | 1.59E-66  | 1.77E-64 down  |
| ECM2     | -2.4395643 | 0.85747152 | 2.08E-84  | 5.77E-82 down  |
| AQP1     | -2.4337694 | 3.78619859 | 2.17E-35  | 5.39E-34 down  |
| FGF7     | -2.4277015 | 0.48259104 | 1.76E-102 | 1.19E-99 down  |
| ABI3BP   | -2.4221141 | 0.86966923 | 7.89E-71  | 1.11E-68 down  |
| LIFR     | -2.4210241 | 1.40552612 | 9.95E-67  | 1.14E-64 down  |
| LONRF2   | -2.4196224 | 1.19386576 | 5.82E-76  | 1.05E-73 down  |
| FOXL2    | -2.4185071 | 1.1774701  | 6.25E-51  | 3.41E-49 down  |
| C16orf45 | -2.4159574 | 1.7802202  | 1.03E-56  | 7.37E-55 down  |
| ARHGEF25 | -2.4100313 | 1.99797414 | 2.71E-55  | 1.81E-53 down  |
| TSPYL5   | -2.4071732 | 1.31420126 | 1.53E-32  | 3.32E-31 down  |
| EMCN     | -2.39839   | 1.05060771 | 8.83E-71  | 1.22E-68 down  |
| PLIN4    | -2.3938771 | 1.0931566  | 1.06E-52  | 6.07E-51 down  |
| LDB2     | -2.3935144 | 1.67524799 | 3.69E-60  | 3.12E-58 down  |
| PLAC9    | -2.3880756 | 1.08569621 | 4.27E-61  | 3.79E-59 down  |
| NR2F1    | -2.3832451 | 2.27893306 | 5.19E-34  | 1.20E-32 down  |
| DPYSL3   | -2.3817555 | 3.27748405 | 3.38E-22  | 4.14E-21 down  |
| FBXL7    | -2.3807565 | 1.72379956 | 2.00E-45  | 7.83E-44 down  |
| DDR2     | -2.3807299 | 1.28419284 | 9.96E-64  | 9.81E-62 down  |
| ADAM33   | -2.364488  | 1.23443187 | 5.39E-35  | 1.31E-33 down  |
| GEM      | -2.3630053 | 2.37318767 | 1.38E-32  | 3.00E-31 down  |
| NR4A1    | -2.3625254 | 2.87068608 | 2.09E-26  | 3.30E-25 down  |
| TPM1     | -2.3558163 | 3.46425981 | 4.41E-53  | 2.59E-51 down  |
| NPR1     | -2.3515781 | 2.08589598 | 7.98E-21  | 8.97E-20 down  |
| MGP      | -2.3452731 | 4.89664339 | 2.99E-21  | 3.45E-20 down  |
| TRH      | -2.3426622 | 0.76069288 | 3.42E-15  | 2.54E-14 down  |
| CPED1    | -2.3347168 | 0.83399498 | 6.68E-83  | 1.69E-80 down  |

|          |            |            |           |                |
|----------|------------|------------|-----------|----------------|
| TIMP2    | -2.3324469 | 4.89298254 | 5.21E-34  | 1.20E-32 down  |
| OLFML2A  | -2.3306483 | 1.86102558 | 4.94E-49  | 2.39E-47 down  |
| COX7A1   | -2.3298429 | 2.32606602 | 2.72E-48  | 1.25E-46 down  |
| HLF      | -2.3296843 | 0.63432796 | 3.01E-88  | 1.08E-85 down  |
| AKT3     | -2.3269404 | 1.0479013  | 9.32E-84  | 2.55E-81 down  |
| CNRIP1   | -2.3265661 | 1.25979304 | 5.21E-87  | 1.71E-84 down  |
| FLNA     | -2.3209839 | 6.2514306  | 3.15E-31  | 6.46E-30 down  |
| PDE2A    | -2.3154777 | 0.61049614 | 6.04E-109 | 5.67E-106 down |
| GNG11    | -2.3085443 | 2.95307297 | 2.09E-35  | 5.21E-34 down  |
| TXNIP    | -2.3028168 | 6.34831045 | 2.01E-32  | 4.32E-31 down  |
| CTSK     | -2.298425  | 4.05924454 | 5.26E-29  | 9.54E-28 down  |
| TUB      | -2.2983613 | 0.98673918 | 2.61E-64  | 2.62E-62 down  |
| TWIST2   | -2.296487  | 1.81904644 | 2.69E-25  | 3.95E-24 down  |
| TMEM132C | -2.2878465 | 0.43402553 | 2.17E-82  | 5.35E-80 down  |
| LIMS2    | -2.2857658 | 2.13089634 | 7.82E-47  | 3.29E-45 down  |
| FGF2     | -2.2837076 | 0.71740346 | 1.46E-92  | 6.86E-90 down  |
| TSPAN18  | -2.2807391 | 1.39215101 | 2.45E-49  | 1.22E-47 down  |
| ZEB1     | -2.2803369 | 1.39242246 | 7.37E-57  | 5.34E-55 down  |
| ENPP2    | -2.2795737 | 2.55020017 | 1.54E-27  | 2.59E-26 down  |
| ALDH1A1  | -2.2777821 | 4.35655009 | 2.29E-13  | 1.47E-12 down  |
| COL14A1  | -2.277162  | 2.09666659 | 5.41E-26  | 8.36E-25 down  |
| MYOCD    | -2.2756494 | 0.33154958 | 4.54E-121 | 9.93E-118 down |
| THBS1    | -2.2711787 | 3.49835696 | 2.23E-23  | 2.94E-22 down  |
| AHNAK    | -2.2677337 | 4.30731755 | 1.63E-42  | 5.59E-41 down  |
| PID1     | -2.2663492 | 0.70830592 | 2.77E-77  | 5.47E-75 down  |
| FXYP1    | -2.2533837 | 0.51732635 | 2.42E-87  | 8.22E-85 down  |
| SNCG     | -2.2511454 | 2.35836901 | 7.36E-16  | 5.77E-15 down  |
| IL33     | -2.2466656 | 2.26663604 | 1.36E-22  | 1.72E-21 down  |
| ATP1B2   | -2.2425415 | 1.20841571 | 3.91E-47  | 1.68E-45 down  |
| TGM2     | -2.239027  | 4.32552498 | 2.22E-26  | 3.49E-25 down  |
| IGFBP4   | -2.2379178 | 7.00574577 | 6.76E-21  | 7.64E-20 down  |
| SSPN     | -2.2358811 | 1.32586282 | 2.24E-65  | 2.39E-63 down  |
| SVIL     | -2.2250014 | 2.75561915 | 1.61E-44  | 6.03E-43 down  |
| pk       | -2.2233248 | 2.36746783 | 3.42E-62  | 3.21E-60 down  |
| MAF      | -2.2219521 | 1.72745746 | 3.49E-52  | 1.99E-50 down  |
| LHFP     | -2.2084811 | 3.05530454 | 1.68E-40  | 5.25E-39 down  |
| TNS2     | -2.205488  | 2.79509147 | 1.09E-61  | 9.88E-60 down  |
| NXPH3    | -2.2002552 | 0.67095464 | 1.52E-77  | 3.09E-75 down  |
| RERGL    | -2.1949998 | 0.43931371 | 1.24E-85  | 3.77E-83 down  |
| CDO1     | -2.1880286 | 0.74154787 | 5.55E-44  | 2.00E-42 down  |
| CPE      | -2.1879675 | 3.20929022 | 1.16E-25  | 1.75E-24 down  |
| OLFML1   | -2.1843591 | 1.37739696 | 1.84E-54  | 1.19E-52 down  |
| CYS1     | -2.1834737 | 1.4047769  | 8.00E-18  | 7.21E-17 down  |
| PHYHIP   | -2.1833034 | 0.72527651 | 1.47E-91  | 6.42E-89 down  |
| KLF9     | -2.183003  | 2.28383265 | 1.85E-55  | 1.25E-53 down  |

|         |            |            |           |                |
|---------|------------|------------|-----------|----------------|
| TCEAL1  | -2.1784861 | 3.1730996  | 7.52E-60  | 6.28E-58 down  |
| PDGFRA  | -2.1777523 | 1.58180562 | 7.24E-36  | 1.84E-34 down  |
| DPP6    | -2.1676992 | 0.5711129  | 6.96E-59  | 5.53E-57 down  |
| DIRAS1  | -2.1675571 | 0.73116109 | 3.52E-51  | 1.94E-49 down  |
| FAXDC2  | -2.1673242 | 1.48719348 | 7.57E-62  | 6.91E-60 down  |
| CCDC69  | -2.1666353 | 2.19148692 | 1.55E-46  | 6.43E-45 down  |
| CALHM2  | -2.1621426 | 2.39788102 | 5.32E-50  | 2.75E-48 down  |
| SOCS2   | -2.1614203 | 1.25704184 | 3.97E-65  | 4.20E-63 down  |
| APBB1   | -2.1607822 | 2.1433313  | 7.68E-42  | 2.55E-40 down  |
| RHOJ    | -2.1520526 | 1.64378968 | 3.21E-63  | 3.15E-61 down  |
| DIXDC1  | -2.1489209 | 1.28616194 | 5.80E-92  | 2.66E-89 down  |
| SMIM10  | -2.1469579 | 1.5197043  | 1.90E-58  | 1.49E-56 down  |
| KCNE4   | -2.1439572 | 0.98425201 | 2.92E-54  | 1.84E-52 down  |
| TMEM47  | -2.1432414 | 2.65771211 | 1.57E-22  | 1.97E-21 down  |
| RBM24   | -2.1361993 | 1.10475321 | 1.87E-40  | 5.82E-39 down  |
| PTGFR   | -2.1350833 | 0.29843713 | 9.39E-113 | 1.09E-109 down |
| PPP1R3C | -2.1334393 | 0.99939246 | 1.20E-60  | 1.04E-58 down  |
| OMD     | -2.1303188 | 0.34403137 | 4.62E-96  | 2.40E-93 down  |
| POSTN   | -2.1298196 | 2.06488761 | 3.10E-18  | 2.88E-17 down  |
| ISLR    | -2.1288339 | 5.06930026 | 8.22E-18  | 7.39E-17 down  |
| LAMA4   | -2.1253832 | 2.03456633 | 8.96E-47  | 3.75E-45 down  |
| NR2F2   | -2.1242567 | 3.4521149  | 3.28E-42  | 1.11E-40 down  |
| CYYR1   | -2.119715  | 1.91019946 | 3.57E-41  | 1.15E-39 down  |
| MYCT1   | -2.1194423 | 1.09499059 | 3.83E-74  | 5.99E-72 down  |
| GPRASP2 | -2.1144968 | 1.37817365 | 1.71E-77  | 3.43E-75 down  |
| COL4A6  | -2.1122795 | 0.48506078 | 5.56E-89  | 2.11E-86 down  |
| PI16    | -2.1109373 | 0.40986073 | 7.01E-53  | 4.06E-51 down  |
| MEDAG   | -2.1091284 | 0.82338292 | 5.28E-64  | 5.25E-62 down  |
| FBLN5   | -2.1086527 | 3.33417884 | 1.80E-24  | 2.51E-23 down  |
| CTGF    | -2.100056  | 5.71213427 | 1.03E-20  | 1.15E-19 down  |
| SYTL4   | -2.0961637 | 1.28201286 | 1.49E-74  | 2.41E-72 down  |
| PROS1   | -2.0940607 | 1.60113321 | 7.30E-47  | 3.08E-45 down  |
| SYNM    | -2.0860597 | 0.81912536 | 1.33E-80  | 3.01E-78 down  |
| GNG7    | -2.0789847 | 0.92775045 | 1.04E-60  | 8.97E-59 down  |
| CXorf36 | -2.0777098 | 1.39236643 | 1.46E-57  | 1.11E-55 down  |
| GSN     | -2.0764619 | 5.20348746 | 9.58E-38  | 2.68E-36 down  |
| CFL2    | -2.0702591 | 1.95652187 | 1.26E-70  | 1.73E-68 down  |
| NAP1L3  | -2.0700519 | 0.89057993 | 2.15E-60  | 1.82E-58 down  |
| FRMD6   | -2.0687577 | 1.38839989 | 2.69E-48  | 1.24E-46 down  |
| RASSF8  | -2.065474  | 1.23095061 | 4.02E-56  | 2.81E-54 down  |
| CRISP3  | -2.0649302 | 0.97728808 | 8.40E-13  | 5.15E-12 down  |
| ZFP36   | -2.0644901 | 5.7681503  | 2.52E-18  | 2.36E-17 down  |
| TBX3    | -2.0568025 | 1.79684292 | 1.25E-33  | 2.83E-32 down  |
| LEPR    | -2.0555878 | 0.91825376 | 1.26E-66  | 1.42E-64 down  |
| CORO2B  | -2.0549638 | 0.89756726 | 8.34E-51  | 4.50E-49 down  |

|          |            |            |           |               |
|----------|------------|------------|-----------|---------------|
| SGCA     | -2.053479  | 0.56984356 | 3.54E-58  | 2.74E-56 down |
| AVPR1A   | -2.0491656 | 0.78962058 | 1.49E-47  | 6.63E-46 down |
| CITED2   | -2.04727   | 3.87080443 | 1.30E-26  | 2.08E-25 down |
| GIMAP7   | -2.046698  | 2.2002822  | 3.06E-30  | 5.95E-29 down |
| SLC7A2   | -2.0448365 | 1.60660983 | 1.89E-15  | 1.44E-14 down |
| PGR      | -2.0349665 | 2.7691466  | 6.05E-11  | 3.17E-10 down |
| FBXL22   | -2.0319934 | 0.72987846 | 1.27E-93  | 6.26E-91 down |
| MMRN1    | -2.0274612 | 1.14366438 | 2.87E-39  | 8.53E-38 down |
| REM1     | -2.0269674 | 0.97642913 | 1.22E-62  | 1.16E-60 down |
| STON1    | -2.0238966 | 0.9970254  | 9.93E-59  | 7.86E-57 down |
| SCARA3   | -2.0237983 | 4.18256907 | 2.28E-19  | 2.30E-18 down |
| MUM1L1   | -2.0218739 | 0.63994147 | 3.30E-53  | 1.97E-51 down |
| AKAP12   | -2.0214971 | 2.16034208 | 4.14E-20  | 4.41E-19 down |
| CASQ2    | -2.0214791 | 0.46306927 | 1.35E-74  | 2.20E-72 down |
| FAM198B  | -2.0182102 | 2.26980499 | 7.35E-22  | 8.84E-21 down |
| JAZF1    | -2.0168742 | 2.05405545 | 5.35E-56  | 3.70E-54 down |
| MATN2    | -2.0158176 | 2.95539538 | 5.19E-19  | 5.10E-18 down |
| PAMR1    | -2.0097075 | 2.6467489  | 3.29E-18  | 3.05E-17 down |
| SSC5D    | -2.0084261 | 1.3997605  | 2.63E-34  | 6.20E-33 down |
| RBP7     | -2.0069508 | 1.83158169 | 8.31E-22  | 9.95E-21 down |
| ATOH8    | -2.0057679 | 1.03620368 | 4.82E-42  | 1.61E-40 down |
| WISP2    | -2.0000923 | 0.49946659 | 2.75E-54  | 1.74E-52 down |
| SGCE     | -1.9996155 | 2.54701115 | 1.28E-25  | 1.93E-24 down |
| PALLD    | -1.9976184 | 3.95918773 | 2.12E-24  | 2.95E-23 down |
| IGF2     | -1.9973323 | 4.24967567 | 3.04E-06  | 9.82E-06 down |
| C8orf88  | -1.9941257 | 0.57193796 | 1.30E-64  | 1.32E-62 down |
| ITPR1    | -1.9935074 | 1.06322021 | 5.17E-67  | 6.00E-65 down |
| SMTN     | -1.9934903 | 2.88946701 | 7.83E-48  | 3.54E-46 down |
| FMOD     | -1.9932222 | 4.38993583 | 1.15E-13  | 7.55E-13 down |
| MFAP5    | -1.992665  | 1.70365562 | 4.75E-14  | 3.22E-13 down |
| GLT8D2   | -1.9820207 | 1.36340929 | 1.37E-53  | 8.26E-52 down |
| SEPP1    | -1.9798244 | 2.24040674 | 1.87E-25  | 2.78E-24 down |
| VSTM4    | -1.9756036 | 0.87506104 | 7.24E-66  | 7.88E-64 down |
| ADAMTS1  | -1.9679366 | 3.56732462 | 2.33E-19  | 2.35E-18 down |
| TMOD1    | -1.9668009 | 2.0560798  | 1.30E-19  | 1.34E-18 down |
| C1S      | -1.965601  | 4.05554847 | 6.74E-21  | 7.62E-20 down |
| ZFPM2    | -1.9645086 | 0.4168103  | 1.53E-102 | 1.08E-99 down |
| TPSB2    | -1.9621772 | 1.26505382 | 2.77E-22  | 3.41E-21 down |
| PII5     | -1.959728  | 0.55121166 | 6.91E-53  | 4.02E-51 down |
| PTPRN2   | -1.9573448 | 0.87607961 | 8.08E-64  | 8.00E-62 down |
| KLF4     | -1.9562468 | 2.37928062 | 3.08E-31  | 6.34E-30 down |
| PTN      | -1.9554898 | 3.16212632 | 1.00E-10  | 5.14E-10 down |
| CA11     | -1.9546613 | 3.03531353 | 2.70E-26  | 4.23E-25 down |
| CRISPLD2 | -1.9545467 | 1.83209168 | 5.75E-42  | 1.91E-40 down |
| MXRA8    | -1.952271  | 3.8136883  | 8.10E-19  | 7.81E-18 down |

|          |            |            |           |                |
|----------|------------|------------|-----------|----------------|
| NBL1     | -1.9516096 | 3.61724595 | 2.49E-21  | 2.89E-20 down  |
| COL6A3   | -1.949558  | 3.14629215 | 2.68E-20  | 2.90E-19 down  |
| SNAI2    | -1.9487946 | 1.85276207 | 1.61E-33  | 3.63E-32 down  |
| DENND2A  | -1.9487038 | 1.70204122 | 3.09E-44  | 1.14E-42 down  |
| PKD2     | -1.9474052 | 2.62288307 | 7.42E-51  | 4.03E-49 down  |
| LRRC4B   | -1.945903  | 1.23687176 | 8.46E-31  | 1.70E-29 down  |
| ABCA8    | -1.9393771 | 0.43126857 | 9.97E-104 | 7.28E-101 down |
| LGI4     | -1.9372536 | 0.57239064 | 5.47E-93  | 2.63E-90 down  |
| HSD17B6  | -1.9361625 | 0.68019776 | 1.14E-68  | 1.40E-66 down  |
| EPDR1    | -1.935637  | 2.75459736 | 1.09E-19  | 1.13E-18 down  |
| INMT     | -1.9355609 | 0.98628803 | 2.38E-47  | 1.04E-45 down  |
| C3orf70  | -1.9353967 | 0.52354928 | 5.55E-83  | 1.42E-80 down  |
| SELP     | -1.9347982 | 0.94355943 | 5.04E-47  | 2.15E-45 down  |
| WBSCR17  | -1.9318617 | 0.91476035 | 6.91E-30  | 1.32E-28 down  |
| AOX1     | -1.9309461 | 0.46160553 | 2.87E-77  | 5.61E-75 down  |
| SH3BP5   | -1.9308204 | 1.3052968  | 1.16E-52  | 6.67E-51 down  |
| TMEM246  | -1.9303877 | 0.9597822  | 3.37E-31  | 6.89E-30 down  |
| OLFM1    | -1.9295641 | 0.78154406 | 2.52E-35  | 6.22E-34 down  |
| EVA1C    | -1.9235677 | 1.69491817 | 2.44E-38  | 6.99E-37 down  |
| HSPA12B  | -1.9226763 | 1.40711529 | 2.47E-55  | 1.67E-53 down  |
| GIMAP6   | -1.9097359 | 1.61581634 | 8.21E-44  | 2.94E-42 down  |
| PLAT     | -1.9064684 | 2.73821508 | 7.61E-21  | 8.56E-20 down  |
| MMP28    | -1.9037655 | 0.61714167 | 2.57E-74  | 4.09E-72 down  |
| CDH13    | -1.9016225 | 0.81876648 | 1.18E-57  | 9.00E-56 down  |
| AEBP1    | -1.9012261 | 4.87008287 | 1.70E-17  | 1.50E-16 down  |
| VSIG2    | -1.9009693 | 1.3078696  | 4.31E-14  | 2.93E-13 down  |
| PALM     | -1.8988374 | 2.69456379 | 4.85E-15  | 3.55E-14 down  |
| MYADM    | -1.8942542 | 4.99049574 | 1.25E-33  | 2.82E-32 down  |
| CCBE1    | -1.8921242 | 0.39120926 | 4.13E-69  | 5.25E-67 down  |
| GPIHBP1  | -1.8916826 | 0.41737424 | 1.54E-85  | 4.54E-83 down  |
| CLIC2    | -1.8903859 | 1.55554788 | 5.31E-53  | 3.10E-51 down  |
| PPM1K    | -1.8896472 | 1.23102267 | 8.81E-67  | 1.02E-64 down  |
| PTGDS    | -1.8886616 | 4.67107138 | 1.35E-08  | 5.63E-08 down  |
| TMEM200A | -1.8871453 | 1.31273181 | 5.73E-38  | 1.63E-36 down  |
| C1QTNF7  | -1.887078  | 0.59374549 | 6.06E-79  | 1.33E-76 down  |
| AFAP1L2  | -1.8870274 | 2.33455996 | 1.17E-26  | 1.87E-25 down  |
| ADAMTS5  | -1.8850031 | 1.004032   | 4.15E-43  | 1.45E-41 down  |
| ABCC9    | -1.8793361 | 0.47099643 | 2.26E-105 | 1.93E-102 down |
| CRYAB    | -1.8773761 | 3.12568196 | 6.30E-12  | 3.58E-11 down  |
| NR3C1    | -1.8756466 | 1.24980396 | 1.82E-48  | 8.52E-47 down  |
| SOX15    | -1.8750207 | 0.92831592 | 1.20E-59  | 9.92E-58 down  |
| KCNJ8    | -1.8743255 | 1.37690736 | 1.23E-53  | 7.47E-52 down  |
| SLC2A4   | -1.8727057 | 0.53986244 | 1.98E-84  | 5.57E-82 down  |
| ST5      | -1.8670594 | 2.37906224 | 2.15E-51  | 1.20E-49 down  |
| LAYN     | -1.8667895 | 1.42658241 | 5.96E-57  | 4.40E-55 down  |



|          |            |            |           |                |
|----------|------------|------------|-----------|----------------|
| MEF2C    | -1.8665956 | 1.03070105 | 1.34E-83  | 3.62E-81 down  |
| NPR2     | -1.8633053 | 1.81218387 | 7.95E-51  | 4.31E-49 down  |
| HIC1     | -1.8624252 | 1.17668116 | 8.44E-54  | 5.22E-52 down  |
| MDFIC    | -1.8599823 | 1.60836376 | 1.55E-44  | 5.83E-43 down  |
| RFTN1    | -1.8596172 | 2.31447405 | 1.63E-39  | 4.92E-38 down  |
| RARRES2  | -1.8586891 | 4.6195285  | 4.40E-15  | 3.24E-14 down  |
| PAGE4    | -1.8571272 | 0.54062875 | 8.91E-34  | 2.02E-32 down  |
| CCL14    | -1.8534637 | 0.21422844 | 1.01E-115 | 1.42E-112 down |
| PDZD4    | -1.8516563 | 0.70956726 | 6.58E-43  | 2.28E-41 down  |
| UST      | -1.8452582 | 0.95600839 | 7.84E-43  | 2.71E-41 down  |
| ATF3     | -1.843315  | 3.15016397 | 3.42E-16  | 2.76E-15 down  |
| AXL      | -1.8372545 | 2.53061482 | 2.58E-35  | 6.36E-34 down  |
| NDP      | -1.8371838 | 1.91972853 | 2.99E-16  | 2.42E-15 down  |
| TEF      | -1.8363691 | 2.22458764 | 6.45E-61  | 5.63E-59 down  |
| SYDE1    | -1.8360372 | 2.01919785 | 2.87E-41  | 9.30E-40 down  |
| SNCA     | -1.8341733 | 0.7812363  | 5.58E-56  | 3.83E-54 down  |
| KDR      | -1.8314903 | 1.89417873 | 9.40E-40  | 2.87E-38 down  |
| PPP1R14A | -1.8284476 | 2.80611358 | 1.32E-15  | 1.01E-14 down  |
| SUSD3    | -1.8280516 | 2.41238257 | 1.82E-19  | 1.84E-18 down  |
| COLEC12  | -1.8270055 | 0.96116966 | 4.81E-35  | 1.17E-33 down  |
| MMRN2    | -1.8258808 | 2.14607201 | 2.73E-41  | 8.87E-40 down  |
| LPP      | -1.8193964 | 2.25250962 | 2.57E-47  | 1.12E-45 down  |
| PRKG1    | -1.818561  | 0.56008617 | 1.54E-85  | 4.54E-83 down  |
| THBS2    | -1.8178876 | 2.4098475  | 1.84E-16  | 1.51E-15 down  |
| HTR2B    | -1.8146563 | 1.0773635  | 3.53E-30  | 6.84E-29 down  |
| HOXD8    | -1.8138519 | 1.70624823 | 2.23E-23  | 2.94E-22 down  |
| GUCY1A2  | -1.8111015 | 0.64585273 | 1.39E-64  | 1.41E-62 down  |
| PDE8B    | -1.8101408 | 0.98687854 | 2.11E-70  | 2.81E-68 down  |
| PBX1     | -1.8099954 | 2.57277269 | 4.15E-34  | 9.67E-33 down  |
| ASB2     | -1.8057715 | 1.09456556 | 2.66E-50  | 1.39E-48 down  |
| ARHGAP6  | -1.8054996 | 0.45285964 | 3.72E-95  | 1.88E-92 down  |
| SETD7    | -1.8017011 | 1.63738279 | 2.07E-44  | 7.68E-43 down  |
| MITF     | -1.8013848 | 1.88436784 | 4.13E-36  | 1.07E-34 down  |
| PROCR    | -1.8000306 | 2.74035895 | 2.42E-29  | 4.44E-28 down  |
| CTSF     | -1.7986986 | 4.18726557 | 4.23E-20  | 4.50E-19 down  |
| C2orf40  | -1.7932551 | 1.30349475 | 1.68E-15  | 1.28E-14 down  |
| DPYD     | -1.7928499 | 1.068126   | 2.14E-47  | 9.41E-46 down  |
| CDC42EP3 | -1.7897093 | 2.19699373 | 1.41E-44  | 5.32E-43 down  |
| CLIC4    | -1.7896229 | 4.46584217 | 5.99E-26  | 9.22E-25 down  |
| SPEG     | -1.7866885 | 0.8173964  | 1.82E-46  | 7.49E-45 down  |
| LIX1L    | -1.7863513 | 2.75752183 | 7.62E-40  | 2.33E-38 down  |
| TRPC1    | -1.7835871 | 0.73393159 | 6.70E-68  | 8.11E-66 down  |
| FOXL2NB  | -1.7811045 | 0.62963719 | 4.82E-61  | 4.24E-59 down  |
| PDGFRL   | -1.774968  | 1.96393765 | 8.70E-23  | 1.11E-21 down  |
| GIMAP8   | -1.7720694 | 1.24341421 | 1.06E-50  | 5.64E-49 down  |

|          |            |            |          |               |
|----------|------------|------------|----------|---------------|
| EFS      | -1.7677798 | 1.94022122 | 2.28E-17 | 1.99E-16 down |
| SOD3     | -1.7651565 | 4.25597545 | 4.95E-12 | 2.85E-11 down |
| PRKCDBP  | -1.7643667 | 3.04482632 | 6.96E-21 | 7.86E-20 down |
| FAM110D  | -1.7618464 | 1.0769482  | 4.63E-55 | 3.04E-53 down |
| CLU      | -1.7610189 | 6.68017963 | 3.79E-07 | 1.35E-06 down |
| FERMT2   | -1.7573931 | 2.36489512 | 2.29E-45 | 8.96E-44 down |
| RGS5     | -1.7571081 | 3.21443674 | 2.73E-19 | 2.73E-18 down |
| DPYSL2   | -1.7564646 | 2.68654274 | 1.11E-24 | 1.56E-23 down |
| GSPT2    | -1.7537247 | 0.97881866 | 2.25E-29 | 4.15E-28 down |
| EBF4     | -1.752393  | 2.28576071 | 4.26E-20 | 4.53E-19 down |
| PARM1    | -1.7496274 | 2.27640176 | 4.59E-16 | 3.68E-15 down |
| S1PR1    | -1.7458947 | 2.08945337 | 3.16E-32 | 6.75E-31 down |
| LUM      | -1.7452796 | 5.16891117 | 4.97E-11 | 2.62E-10 down |
| PRRX1    | -1.7448892 | 2.43581599 | 6.55E-13 | 4.04E-12 down |
| PRKAR2B  | -1.7447022 | 1.30764373 | 1.25E-29 | 2.34E-28 down |
| COPZ2    | -1.7434369 | 1.72027628 | 7.39E-38 | 2.09E-36 down |
| FAM107A  | -1.738628  | 2.50021815 | 2.11E-09 | 9.60E-09 down |
| MXRA7    | -1.7385648 | 2.78683863 | 1.14E-38 | 3.32E-37 down |
| PCDH18   | -1.7369116 | 1.65765953 | 4.82E-28 | 8.36E-27 down |
| SULF2    | -1.7367818 | 3.92667466 | 2.05E-14 | 1.43E-13 down |
| CAV2     | -1.7340863 | 1.60718152 | 2.47E-41 | 8.03E-40 down |
| PDGFRB   | -1.7333186 | 3.48969502 | 2.31E-22 | 2.85E-21 down |
| SELM     | -1.7313302 | 4.07445096 | 8.16E-19 | 7.87E-18 down |
| ADAMTSL5 | -1.729235  | 0.65505985 | 6.49E-49 | 3.11E-47 down |
| CLDN5    | -1.7290174 | 2.39586944 | 6.07E-18 | 5.52E-17 down |
| TACR2    | -1.7246611 | 0.75193568 | 6.27E-54 | 3.89E-52 down |
| PER1     | -1.7222241 | 2.31372864 | 3.68E-38 | 1.05E-36 down |
| TEK      | -1.7216429 | 1.30367695 | 2.21E-38 | 6.36E-37 down |
| STAT5B   | -1.7207856 | 3.25070575 | 2.31E-67 | 2.75E-65 down |
| IRS1     | -1.7198443 | 2.17076262 | 7.05E-24 | 9.49E-23 down |
| CD34     | -1.7174915 | 2.43059779 | 2.97E-37 | 8.08E-36 down |
| CDC42EP5 | -1.7168743 | 2.40074801 | 1.17E-20 | 1.30E-19 down |
| METTTL7A | -1.7167691 | 3.59143381 | 1.56E-23 | 2.08E-22 down |
| THBD     | -1.7125241 | 1.74222924 | 9.24E-29 | 1.65E-27 down |
| FAM69A   | -1.7122174 | 1.33718125 | 3.30E-46 | 1.35E-44 down |
| CPQ      | -1.7106391 | 2.86368108 | 1.55E-38 | 4.49E-37 down |
| DMD      | -1.7069522 | 0.75824268 | 5.59E-59 | 4.46E-57 down |
| FAM65B   | -1.705853  | 0.7796157  | 2.95E-64 | 2.95E-62 down |
| SYNE1    | -1.702237  | 0.64036119 | 1.66E-75 | 2.87E-73 down |
| COL15A1  | -1.700759  | 2.80084379 | 3.44E-19 | 3.42E-18 down |
| CBX6     | -1.7004723 | 2.89192774 | 3.11E-25 | 4.54E-24 down |
| SNCAIP   | -1.6998602 | 1.20193561 | 1.67E-35 | 4.17E-34 down |
| AR       | -1.6992439 | 2.07900533 | 3.33E-19 | 3.31E-18 down |
| CILP     | -1.6950307 | 0.80338966 | 4.65E-27 | 7.66E-26 down |
| PIANP    | -1.6949432 | 1.07233627 | 1.05E-24 | 1.48E-23 down |

|          |            |            |          |               |
|----------|------------|------------|----------|---------------|
| ITGA11   | -1.6940528 | 1.14887942 | 1.30E-26 | 2.07E-25 down |
| SLC16A2  | -1.6921332 | 1.7704245  | 1.34E-28 | 2.39E-27 down |
| TBL1X    | -1.6908878 | 2.85774829 | 2.52E-37 | 6.91E-36 down |
| C1QTNF1  | -1.6898522 | 1.59125167 | 7.24E-37 | 1.93E-35 down |
| BCL2     | -1.6895426 | 1.82901781 | 9.73E-27 | 1.57E-25 down |
| TGFBR2   | -1.6886625 | 3.51913538 | 1.26E-25 | 1.91E-24 down |
| GNA14    | -1.6885786 | 1.16703352 | 5.08E-43 | 1.77E-41 down |
| SHC2     | -1.6884681 | 1.95816283 | 1.02E-16 | 8.59E-16 down |
| EPHB6    | -1.6884369 | 1.48970865 | 2.29E-21 | 2.66E-20 down |
| CPA3     | -1.6807891 | 0.8318001  | 6.56E-24 | 8.85E-23 down |
| APOLD1   | -1.6792014 | 1.2100372  | 3.68E-40 | 1.14E-38 down |
| PDZRN3   | -1.6790188 | 2.57275705 | 2.78E-17 | 2.40E-16 down |
| DCHS1    | -1.6787884 | 1.7038544  | 2.36E-27 | 3.95E-26 down |
| PRICKLE2 | -1.675755  | 1.51177579 | 2.98E-43 | 1.05E-41 down |
| PTH1R    | -1.6752802 | 1.10919033 | 9.89E-22 | 1.18E-20 down |
| TSPAN7   | -1.6743587 | 2.6077891  | 1.44E-11 | 7.96E-11 down |
| RASSF2   | -1.6742314 | 2.00773019 | 1.07E-30 | 2.14E-29 down |
| ANKRD29  | -1.6722323 | 0.66398754 | 5.04E-72 | 7.42E-70 down |
| TCEAL4   | -1.6677415 | 5.16404762 | 5.27E-46 | 2.12E-44 down |
| NES      | -1.6671237 | 3.28906863 | 1.50E-20 | 1.66E-19 down |
| FBN1     | -1.6666102 | 1.52845795 | 3.15E-28 | 5.50E-27 down |
| GJC1     | -1.665366  | 1.07152035 | 2.44E-35 | 6.07E-34 down |
| RECK     | -1.6647296 | 1.01854613 | 6.45E-65 | 6.73E-63 down |
| CRIM1    | -1.6625115 | 2.7124232  | 8.99E-32 | 1.89E-30 down |
| PAEP     | -1.662488  | 0.91877114 | 2.25E-10 | 1.11E-09 down |
| C10orf54 | -1.6608797 | 2.57617331 | 3.23E-29 | 5.91E-28 down |
| FHL5     | -1.655835  | 0.36865381 | 1.22E-89 | 4.80E-87 down |
| STXBP1   | -1.6555467 | 2.01574531 | 7.74E-30 | 1.47E-28 down |
| DNAJB4   | -1.6537745 | 1.91627315 | 6.36E-38 | 1.80E-36 down |
| COL16A1  | -1.6537719 | 2.00327542 | 9.65E-27 | 1.56E-25 down |
| EDIL3    | -1.6496448 | 1.3183557  | 1.78E-27 | 3.00E-26 down |
| SERINC1  | -1.6493396 | 5.06613823 | 2.98E-35 | 7.32E-34 down |
| RAB23    | -1.6485612 | 1.42356419 | 1.17E-38 | 3.42E-37 down |
| SH3BGRL  | -1.6483391 | 5.17072321 | 5.02E-30 | 9.63E-29 down |
| COL6A2   | -1.6468725 | 6.06098019 | 2.28E-14 | 1.59E-13 down |
| REEP1    | -1.6435076 | 0.98293888 | 1.28E-38 | 3.72E-37 down |
| ZNF521   | -1.6417807 | 1.01922023 | 2.42E-26 | 3.79E-25 down |
| ELTD1    | -1.6415352 | 1.9423566  | 2.49E-32 | 5.34E-31 down |
| BOC      | -1.6399825 | 1.80621018 | 1.11E-19 | 1.14E-18 down |
| CLEC14A  | -1.6397149 | 2.88221554 | 5.52E-27 | 9.04E-26 down |
| SLIT3    | -1.6392362 | 1.40689401 | 9.48E-28 | 1.62E-26 down |
| SNED1    | -1.6355412 | 1.09273119 | 1.64E-42 | 5.61E-41 down |
| ITGA7    | -1.6353226 | 1.56864083 | 4.09E-27 | 6.77E-26 down |
| FKBP7    | -1.6337746 | 2.03605023 | 1.67E-38 | 4.83E-37 down |
| FBXO17   | -1.6335021 | 1.28804031 | 6.82E-18 | 6.19E-17 down |

|          |            |            |          |               |
|----------|------------|------------|----------|---------------|
| TCEAL3   | -1.6283003 | 3.44366179 | 3.31E-40 | 1.03E-38 down |
| ADAMTSL4 | -1.6277388 | 0.9764949  | 5.10E-44 | 1.85E-42 down |
| APOBEC3C | -1.6275981 | 3.40325936 | 9.30E-18 | 8.34E-17 down |
| ABCB1    | -1.6252969 | 0.98529021 | 3.48E-36 | 8.99E-35 down |
| TUBB6    | -1.6251849 | 3.29138587 | 3.35E-19 | 3.33E-18 down |
| HNMT     | -1.6246068 | 2.4256536  | 1.13E-25 | 1.71E-24 down |
| STMN3    | -1.6226852 | 3.07425871 | 5.16E-14 | 3.49E-13 down |
| ITGA8    | -1.6223832 | 0.58260915 | 4.75E-74 | 7.38E-72 down |
| GLI3     | -1.6196677 | 0.92792904 | 7.72E-38 | 2.17E-36 down |
| LAMA2    | -1.6188874 | 0.96038823 | 1.05E-33 | 2.38E-32 down |
| RGMA     | -1.6183441 | 1.35327576 | 9.16E-28 | 1.57E-26 down |
| PCP4     | -1.6151467 | 1.79019348 | 2.75E-08 | 1.11E-07 down |
| TPSAB1   | -1.6137071 | 1.33484931 | 3.51E-16 | 2.83E-15 down |
| CALCRL   | -1.6123878 | 1.57571215 | 3.61E-23 | 4.69E-22 down |
| FZD4     | -1.6076204 | 1.7590348  | 2.13E-42 | 7.23E-41 down |
| EBF1     | -1.6060754 | 1.09859131 | 1.50E-35 | 3.76E-34 down |
| TMEM119  | -1.605305  | 1.76756317 | 5.64E-20 | 5.95E-19 down |
| FIBIN    | -1.6049698 | 1.15881046 | 1.62E-17 | 1.42E-16 down |
| MEIS2    | -1.6038223 | 1.28314044 | 1.03E-24 | 1.46E-23 down |
| SOX18    | -1.6033314 | 2.45148877 | 1.44E-22 | 1.82E-21 down |
| LRP1     | -1.6028779 | 3.33154548 | 6.60E-26 | 1.01E-24 down |
| THRA     | -1.5969175 | 3.0250133  | 1.44E-31 | 2.99E-30 down |
| EFHD1    | -1.596254  | 2.88433771 | 1.11E-13 | 7.28E-13 down |
| CD248    | -1.5947018 | 3.81537469 | 5.66E-18 | 5.16E-17 down |
| ENPP1    | -1.5939646 | 1.11336586 | 2.75E-34 | 6.45E-33 down |
| GJA4     | -1.5916477 | 2.92376753 | 3.93E-14 | 2.68E-13 down |
| ST6GALNA | -1.5869046 | 3.07287283 | 8.18E-45 | 3.14E-43 down |
| RAI2     | -1.5858985 | 3.88745182 | 1.39E-11 | 7.68E-11 down |
| RAB3IL1  | -1.5857302 | 2.90003772 | 6.89E-30 | 1.31E-28 down |
| ENPEP    | -1.5802352 | 0.78900605 | 5.79E-49 | 2.79E-47 down |
| VAMP2    | -1.5779945 | 3.98861258 | 6.05E-34 | 1.38E-32 down |
| TBX2     | -1.5776747 | 1.80494388 | 3.26E-22 | 4.00E-21 down |
| NID1     | -1.5771621 | 3.17575045 | 7.93E-17 | 6.72E-16 down |
| NUDT10   | -1.5705426 | 0.7846621  | 1.94E-36 | 5.07E-35 down |
| ROBO4    | -1.5701234 | 1.56647137 | 5.84E-45 | 2.25E-43 down |
| LMCD1    | -1.5700445 | 1.61900234 | 1.78E-42 | 6.08E-41 down |
| EDNRB    | -1.568897  | 0.85181636 | 1.77E-39 | 5.32E-38 down |
| LYVE1    | -1.5643623 | 0.55111384 | 2.20E-75 | 3.74E-73 down |
| ZBTB38   | -1.5622286 | 2.0379953  | 1.82E-42 | 6.21E-41 down |
| RBPM5    | -1.5622189 | 3.05586567 | 6.97E-22 | 8.40E-21 down |
| HEPH     | -1.5621279 | 1.62198627 | 7.05E-23 | 9.05E-22 down |
| OSBPL1A  | -1.5619804 | 1.96559616 | 4.06E-44 | 1.48E-42 down |
| ANO6     | -1.5616056 | 2.62049286 | 7.58E-38 | 2.13E-36 down |
| HTRA3    | -1.5584277 | 3.01066732 | 1.57E-14 | 1.11E-13 down |
| KANK3    | -1.5567355 | 0.95916802 | 8.19E-55 | 5.33E-53 down |

|          |            |            |          |               |
|----------|------------|------------|----------|---------------|
| PER3     | -1.5564864 | 1.39446468 | 3.05E-36 | 7.91E-35 down |
| PBX3     | -1.5564282 | 1.14805309 | 3.60E-31 | 7.34E-30 down |
| NDRG2    | -1.5562965 | 3.26622066 | 1.34E-15 | 1.03E-14 down |
| LGI2     | -1.5562527 | 0.72168989 | 2.47E-35 | 6.12E-34 down |
| EMP3     | -1.5551497 | 3.95501622 | 1.12E-21 | 1.33E-20 down |
| RCAN2    | -1.555065  | 1.61027985 | 5.68E-23 | 7.32E-22 down |
| SLC25A25 | -1.554192  | 2.09415285 | 2.23E-35 | 5.55E-34 down |
| RHOB     | -1.5520953 | 6.41678903 | 1.27E-19 | 1.31E-18 down |
| CTSO     | -1.5516855 | 3.18845117 | 9.90E-27 | 1.59E-25 down |
| ARHGEF15 | -1.5510022 | 1.37224206 | 3.66E-40 | 1.13E-38 down |
| KCND3    | -1.5491057 | 0.65798863 | 1.25E-45 | 4.96E-44 down |
| PPAP2B   | -1.5477715 | 3.57387748 | 9.36E-15 | 6.70E-14 down |
| SYNPO    | -1.544344  | 2.43105724 | 1.51E-27 | 2.54E-26 down |
| ANXA6    | -1.5437151 | 4.23379583 | 9.59E-23 | 1.22E-21 down |
| GFRA1    | -1.5436495 | 0.55021555 | 7.37E-24 | 9.91E-23 down |
| LRRC32   | -1.5431621 | 2.53363092 | 5.83E-24 | 7.89E-23 down |
| NOSTRIN  | -1.5419035 | 1.12358504 | 1.63E-44 | 6.09E-43 down |
| PYGM     | -1.5415005 | 0.60023028 | 1.05E-42 | 3.60E-41 down |
| HSD17B11 | -1.5360036 | 3.46109002 | 3.64E-20 | 3.89E-19 down |
| FAM65C   | -1.5343076 | 0.80481579 | 3.35E-49 | 1.64E-47 down |
| PRIMA1   | -1.5322326 | 1.28211442 | 7.61E-19 | 7.37E-18 down |
| FYCO1    | -1.5319294 | 2.46324913 | 3.12E-50 | 1.62E-48 down |
| HSPB2    | -1.5315685 | 0.57183786 | 2.11E-59 | 1.72E-57 down |
| RAB31    | -1.5296596 | 2.83140957 | 2.38E-26 | 3.74E-25 down |
| HEYL     | -1.528771  | 1.99549928 | 2.46E-25 | 3.62E-24 down |
| ATP8B2   | -1.527995  | 2.35730479 | 1.67E-27 | 2.81E-26 down |
| NGF      | -1.5275068 | 0.80720674 | 1.35E-39 | 4.08E-38 down |
| TIE1     | -1.5273694 | 2.06505158 | 4.17E-29 | 7.60E-28 down |
| NRXN2    | -1.5262371 | 0.94256148 | 9.05E-36 | 2.30E-34 down |
| CCDC3    | -1.5256181 | 2.683443   | 2.51E-14 | 1.74E-13 down |
| A2M      | -1.5243063 | 5.71533359 | 8.74E-20 | 9.09E-19 down |
| IL6ST    | -1.5241545 | 3.40166195 | 1.42E-26 | 2.25E-25 down |
| WNT4     | -1.5236248 | 1.09222895 | 5.79E-24 | 7.84E-23 down |
| FZD7     | -1.5226173 | 2.18577582 | 1.80E-11 | 9.87E-11 down |
| TIPARP   | -1.5212737 | 2.10973916 | 3.06E-39 | 9.10E-38 down |
| NAP1L2   | -1.520496  | 0.68849811 | 1.84E-44 | 6.85E-43 down |
| PDE5A    | -1.5189222 | 1.21863827 | 1.24E-37 | 3.43E-36 down |
| DIO3     | -1.5177799 | 0.4881836  | 1.20E-44 | 4.57E-43 down |
| ILK      | -1.5173562 | 1.49576913 | 1.20E-40 | 3.77E-39 down |
| FOXO1    | -1.5160617 | 2.8928372  | 1.60E-28 | 2.81E-27 down |
| GIMAP4   | -1.5157497 | 2.75739059 | 1.22E-19 | 1.26E-18 down |
| ANTXR1   | -1.5138609 | 3.55489712 | 2.43E-18 | 2.27E-17 down |
| CLEC2B   | -1.5135731 | 1.62235857 | 5.95E-31 | 1.20E-29 down |
| SPG20    | -1.5127794 | 2.6884246  | 3.25E-25 | 4.74E-24 down |
| ACOX2    | -1.5113715 | 1.21778548 | 1.63E-30 | 3.22E-29 down |

|          |            |            |           |                |
|----------|------------|------------|-----------|----------------|
| DZIP1    | -1.5111884 | 1.39034574 | 4.70E-29  | 8.56E-28 down  |
| TBC1D2B  | -1.5110861 | 1.67997009 | 1.99E-57  | 1.51E-55 down  |
| SERPING1 | -1.5106641 | 6.20032639 | 1.15E-12  | 6.96E-12 down  |
| CELF2    | -1.5080955 | 1.50709207 | 1.16E-23  | 1.55E-22 down  |
| JUN      | -1.5040863 | 6.05803815 | 7.47E-18  | 6.75E-17 down  |
| LOXL4    | -1.5026705 | 1.43579126 | 2.73E-18  | 2.54E-17 down  |
| BTG2     | -1.5019807 | 5.58884374 | 1.56E-14  | 1.10E-13 down  |
| PPAPDC3  | -1.5014228 | 0.6668126  | 2.15E-59  | 1.75E-57 down  |
| KLF6     | -1.5009513 | 3.49169831 | 5.05E-21  | 5.76E-20 down  |
| TIMP3    | -1.5002809 | 0.51171058 | 2.48E-50  | 1.30E-48 down  |
| NUDT11   | -1.4992257 | 0.66184069 | 7.14E-28  | 1.23E-26 down  |
| GAB2     | -1.4991672 | 2.20445495 | 1.17E-27  | 1.98E-26 down  |
| RAMP2    | -1.4947962 | 3.94544294 | 1.18E-18  | 1.12E-17 down  |
| CDON     | -1.4947281 | 0.90593738 | 1.78E-44  | 6.66E-43 down  |
| GLIPR1   | -1.4934725 | 1.34493572 | 2.28E-39  | 6.83E-38 down  |
| NLGN3    | -1.4927385 | 0.71194121 | 3.22E-61  | 2.87E-59 down  |
| KNDC1    | -1.4916355 | 0.47724403 | 3.96E-36  | 1.02E-34 down  |
| MBNL2    | -1.4905957 | 2.80615889 | 1.37E-30  | 2.71E-29 down  |
| PRDM8    | -1.4888632 | 0.38650524 | 1.63E-80  | 3.65E-78 down  |
| VGLL3    | -1.4887836 | 0.36328422 | 3.28E-67  | 3.87E-65 down  |
| LYPLAL1  | -1.4876461 | 1.15180622 | 9.29E-21  | 1.04E-19 down  |
| MARVELD1 | -1.4874895 | 3.67633637 | 1.51E-22  | 1.89E-21 down  |
| CA3      | -1.485692  | 0.61270636 | 2.13E-44  | 7.89E-43 down  |
| TNFSF12  | -1.4853242 | 3.41865486 | 4.10E-23  | 5.31E-22 down  |
| P3H3     | -1.4842899 | 2.62106415 | 6.99E-14  | 4.67E-13 down  |
| DSTN     | -1.4807772 | 6.13561673 | 7.27E-46  | 2.91E-44 down  |
| VAMP5    | -1.4804111 | 4.26534832 | 4.51E-18  | 4.15E-17 down  |
| MT-ND6   | -1.4786348 | 10.36742   | 5.88E-09  | 2.56E-08 down  |
| PEAR1    | -1.4779926 | 0.8602809  | 1.25E-55  | 8.53E-54 down  |
| C1R      | -1.4764162 | 4.69094042 | 2.82E-16  | 2.28E-15 down  |
| HSPB3    | -1.474098  | 0.29822488 | 2.34E-57  | 1.76E-55 down  |
| KCNB1    | -1.4716561 | 0.2196596  | 3.16E-104 | 2.39E-101 down |
| RUSC2    | -1.4712808 | 2.35389335 | 9.00E-42  | 2.97E-40 down  |
| FGD5     | -1.4711168 | 1.58289456 | 4.89E-27  | 8.04E-26 down  |
| MYOM1    | -1.4704089 | 0.47708678 | 1.22E-64  | 1.25E-62 down  |
| RRAD     | -1.4697542 | 2.60126873 | 1.11E-06  | 3.77E-06 down  |
| NEURL1B  | -1.4692456 | 2.38070451 | 1.13E-29  | 2.13E-28 down  |
| RBPM2    | -1.4680368 | 2.51323325 | 4.70E-21  | 5.37E-20 down  |
| SMARCA2  | -1.4679554 | 3.18199054 | 1.43E-21  | 1.68E-20 down  |
| HAAO     | -1.467864  | 1.33854296 | 6.69E-32  | 1.41E-30 down  |
| FLT4     | -1.4676842 | 1.15005062 | 1.82E-49  | 9.15E-48 down  |
| IGIP     | -1.4662453 | 1.68597445 | 8.69E-48  | 3.91E-46 down  |
| SLC16A9  | -1.4660597 | 1.92548645 | 2.89E-15  | 2.16E-14 down  |
| ZBTB4    | -1.4648831 | 3.8072341  | 3.00E-49  | 1.48E-47 down  |
| GPM6A    | -1.4648584 | 0.29075914 | 5.89E-51  | 3.23E-49 down  |

|          |            |            |           |                |
|----------|------------|------------|-----------|----------------|
| TLE4     | -1.4644736 | 1.09344414 | 1.88E-31  | 3.89E-30 down  |
| NLRP1    | -1.4639875 | 1.29342003 | 5.96E-33  | 1.32E-31 down  |
| IGFBP7   | -1.4631246 | 7.1501542  | 6.20E-16  | 4.89E-15 down  |
| TCEAL6   | -1.4574296 | 0.1560737  | 2.08E-106 | 1.86E-103 down |
| DAB2     | -1.4571361 | 1.99614075 | 1.04E-25  | 1.58E-24 down  |
| MRC2     | -1.4559444 | 3.49071014 | 4.37E-15  | 3.22E-14 down  |
| TMEM55A  | -1.4553133 | 1.33770385 | 2.78E-36  | 7.23E-35 down  |
| GREM2    | -1.4528419 | 1.30674656 | 5.61E-08  | 2.20E-07 down  |
| ADRA2C   | -1.4521783 | 3.29636673 | 5.28E-09  | 2.30E-08 down  |
| CCL23    | -1.4521084 | 0.37323752 | 5.31E-57  | 3.95E-55 down  |
| ADAMTSL1 | -1.4510517 | 0.79338554 | 5.03E-30  | 9.64E-29 down  |
| STOM     | -1.4503373 | 4.75047231 | 3.77E-23  | 4.89E-22 down  |
| FAM129A  | -1.4495984 | 1.70525923 | 6.80E-16  | 5.34E-15 down  |
| TMEM204  | -1.4492004 | 3.00954559 | 2.33E-20  | 2.53E-19 down  |
| APOL3    | -1.447262  | 1.68835227 | 2.55E-21  | 2.95E-20 down  |
| CD200    | -1.4463813 | 2.9544145  | 1.38E-12  | 8.30E-12 down  |
| C9orf3   | -1.4463601 | 1.80133558 | 2.63E-43  | 9.27E-42 down  |
| PDE7B    | -1.4452573 | 0.78411349 | 1.38E-49  | 6.94E-48 down  |
| ID4      | -1.4445997 | 4.51802093 | 2.68E-11  | 1.45E-10 down  |
| SNAP25   | -1.4428344 | 0.61413753 | 1.22E-30  | 2.42E-29 down  |
| TMEM240  | -1.4416595 | 0.90002808 | 6.54E-53  | 3.81E-51 down  |
| TRPC4    | -1.4410417 | 0.4451041  | 6.79E-58  | 5.21E-56 down  |
| GBP2     | -1.4405153 | 3.0391963  | 6.03E-16  | 4.76E-15 down  |
| CRMP1    | -1.4398668 | 1.93768318 | 2.31E-22  | 2.85E-21 down  |
| NDNF     | -1.4389312 | 0.7795685  | 1.34E-25  | 2.01E-24 down  |
| CLDN1    | -1.4377885 | 3.52424051 | 9.04E-07  | 3.10E-06 down  |
| KLHL13   | -1.4318167 | 1.47544213 | 6.83E-19  | 6.64E-18 down  |
| ELK3     | -1.4286767 | 3.01070592 | 3.49E-23  | 4.55E-22 down  |
| MAP6     | -1.428183  | 1.23082406 | 1.55E-20  | 1.70E-19 down  |
| NECAB1   | -1.4274178 | 0.30873324 | 2.30E-87  | 7.94E-85 down  |
| EZH1     | -1.4254294 | 2.40998278 | 4.45E-62  | 4.13E-60 down  |
| PJA2     | -1.4231554 | 3.79671553 | 1.57E-28  | 2.77E-27 down  |
| GPR133   | -1.4190384 | 0.31713099 | 1.95E-78  | 4.18E-76 down  |
| ATP1A2   | -1.4181607 | 0.85111698 | 2.60E-12  | 1.53E-11 down  |
| C1orf21  | -1.4156845 | 1.64591628 | 1.48E-31  | 3.08E-30 down  |
| NT5E     | -1.4152492 | 3.19801472 | 5.46E-07  | 1.92E-06 down  |
| CD93     | -1.4148516 | 2.58619902 | 7.94E-22  | 9.52E-21 down  |
| TUSC1    | -1.4133982 | 2.47781289 | 5.83E-16  | 4.61E-15 down  |
| COL6A1   | -1.4133221 | 5.86580506 | 4.85E-12  | 2.79E-11 down  |
| KIF26A   | -1.4115115 | 0.63293013 | 4.12E-33  | 9.20E-32 down  |
| CACNA2D1 | -1.4113337 | 0.45840035 | 5.40E-56  | 3.72E-54 down  |
| RAB8B    | -1.4105822 | 1.7701754  | 2.22E-36  | 5.79E-35 down  |
| DLC1     | -1.4102443 | 1.47504387 | 2.56E-34  | 6.03E-33 down  |
| RRAS     | -1.4098665 | 5.05773525 | 4.38E-20  | 4.65E-19 down  |
| FBXL3    | -1.4097417 | 2.28208693 | 1.08E-38  | 3.17E-37 down  |

|          |            |            |          |               |
|----------|------------|------------|----------|---------------|
| FABP3    | -1.4074886 | 3.02630261 | 6.02E-08 | 2.35E-07 down |
| SLITRK3  | -1.4072887 | 0.11314487 | 7.66E-89 | 2.85E-86 down |
| GATA5    | -1.4070994 | 0.6503043  | 6.51E-16 | 5.13E-15 down |
| SLC22A17 | -1.406313  | 2.4300017  | 4.29E-13 | 2.68E-12 down |
| UBL3     | -1.4058342 | 3.2709598  | 1.10E-29 | 2.08E-28 down |
| DKK3     | -1.405623  | 2.68738693 | 7.48E-15 | 5.41E-14 down |
| NFASC    | -1.4033382 | 0.53189716 | 7.55E-50 | 3.84E-48 down |
| IRS2     | -1.4027305 | 1.43738211 | 9.03E-15 | 6.47E-14 down |
| GABBR1   | -1.4019019 | 1.49115683 | 1.86E-18 | 1.76E-17 down |
| GFPT2    | -1.4013539 | 1.13607153 | 1.26E-22 | 1.60E-21 down |
| CHRD     | -1.4011026 | 1.40223302 | 3.48E-17 | 3.00E-16 down |
| HPSE2    | -1.4010323 | 0.33154834 | 3.63E-44 | 1.33E-42 down |
| LRCH2    | -1.4007528 | 0.56498692 | 3.67E-31 | 7.49E-30 down |
| FILIP1   | -1.3952181 | 0.98188825 | 1.65E-30 | 3.26E-29 down |
| CACNA1C  | -1.3939771 | 0.58059895 | 1.19E-49 | 6.02E-48 down |
| GPR161   | -1.3939378 | 1.40194164 | 8.06E-28 | 1.38E-26 down |
| RASA3    | -1.3909193 | 1.94425258 | 1.40E-25 | 2.10E-24 down |
| SLC45A1  | -1.39072   | 0.83556139 | 4.66E-58 | 3.59E-56 down |
| PPAP2A   | -1.3902148 | 3.6364199  | 1.89E-20 | 2.06E-19 down |
| TM4SF18  | -1.3888776 | 0.98246975 | 9.28E-43 | 3.19E-41 down |
| MAN1C1   | -1.38886   | 1.05917816 | 1.33E-38 | 3.88E-37 down |
| RGAG4    | -1.3886937 | 1.66438717 | 2.46E-27 | 4.11E-26 down |
| IFFO1    | -1.3877705 | 1.15396641 | 4.34E-47 | 1.86E-45 down |
| GRASP    | -1.3859941 | 2.12092215 | 1.42E-23 | 1.89E-22 down |
| FOXO4    | -1.3850574 | 2.66456105 | 3.94E-42 | 1.32E-40 down |
| BCL6B    | -1.3833851 | 1.27035151 | 2.51E-42 | 8.52E-41 down |
| RASD2    | -1.3833796 | 1.16508318 | 1.32E-29 | 2.48E-28 down |
| GIMAP1   | -1.3829854 | 0.92893591 | 1.32E-44 | 5.02E-43 down |
| MAPK10   | -1.3826566 | 0.86151414 | 1.13E-32 | 2.45E-31 down |
| CDKN1B   | -1.3819911 | 3.80649451 | 2.45E-14 | 1.70E-13 down |
| TMEM88   | -1.3795376 | 2.17107782 | 9.25E-24 | 1.24E-22 down |
| BEX4     | -1.3786917 | 4.57787133 | 3.39E-08 | 1.36E-07 down |
| FREM1    | -1.378667  | 0.84348596 | 9.10E-30 | 1.72E-28 down |
| DST      | -1.377378  | 1.70174437 | 8.45E-15 | 6.07E-14 down |
| SLC23A2  | -1.3763302 | 2.03180567 | 9.26E-35 | 2.23E-33 down |
| SLMAP    | -1.3747789 | 2.02821161 | 3.33E-39 | 9.88E-38 down |
| SAMD4A   | -1.3718321 | 0.9464203  | 9.48E-39 | 2.78E-37 down |
| ZNF25    | -1.37177   | 1.61196188 | 8.90E-51 | 4.80E-49 down |
| PKNOX2   | -1.3715842 | 0.50500606 | 8.76E-36 | 2.22E-34 down |
| ARHGAP23 | -1.3715395 | 2.1046237  | 1.74E-21 | 2.04E-20 down |
| TRIM4    | -1.3714105 | 2.25490243 | 1.31E-21 | 1.55E-20 down |
| SH3PXD2A | -1.3708216 | 2.60162674 | 1.46E-30 | 2.90E-29 down |
| RNF150   | -1.3707644 | 1.65733387 | 1.45E-17 | 1.28E-16 down |
| TCEAL5   | -1.3680584 | 0.80663919 | 9.72E-15 | 6.94E-14 down |
| N4BP2L1  | -1.3678156 | 1.12215286 | 3.48E-45 | 1.35E-43 down |



|          |            |            |            |                 |
|----------|------------|------------|------------|-----------------|
| RASL11A  | -1.3674614 | 1.97000188 | 8.26E-19   | 7.96E-18 down   |
| ABCA9    | -1.3659233 | 0.34940087 | 1.80E-70   | 2.44E-68 down   |
| ITPKB    | -1.3653879 | 3.21199331 | 8.90E-26   | 1.36E-24 down   |
| TSPYL2   | -1.3648697 | 2.93704985 | 2.01E-29   | 3.71E-28 down   |
| PLEKHH2  | -1.3624957 | 0.83955752 | 9.35E-31   | 1.87E-29 down   |
| CAB39L   | -1.360079  | 1.52661793 | 2.49E-48   | 1.16E-46 down   |
| AFAP1L1  | -1.3587521 | 1.21984539 | 6.11E-48   | 2.78E-46 down   |
| FAM162B  | -1.3587377 | 0.9180696  | 7.25E-35   | 1.75E-33 down   |
| ATP2B4   | -1.3579581 | 4.47687169 | 1.46E-18   | 1.39E-17 down   |
| EID1     | -1.3572332 | 5.68102136 | 1.46E-33   | 3.29E-32 down   |
| EGFL7    | -1.355111  | 3.6224564  | 4.07E-11   | 2.16E-10 down   |
| CGNL1    | -1.3544192 | 2.22598555 | 1.20E-17   | 1.07E-16 down   |
| CD99L2   | -1.3536574 | 2.95068421 | 4.48E-36   | 1.15E-34 down   |
| PRKCA    | -1.3532936 | 1.47047097 | 2.66E-27   | 4.43E-26 down   |
| SHE      | -1.352911  | 0.5752646  | 1.58E-65   | 1.70E-63 down   |
| FGL2     | -1.3524351 | 1.78531622 | 8.49E-14   | 5.65E-13 down   |
| MCAM     | -1.3492051 | 3.36463239 | 3.29E-19   | 3.28E-18 down   |
| TMEM245  | -1.3489395 | 2.70132298 | 3.07E-38   | 8.79E-37 down   |
| HOXD9    | -1.3488062 | 2.97897419 | 4.92E-14   | 3.33E-13 down   |
| PRX      | -1.3468948 | 0.87288664 | 6.47E-49   | 3.10E-47 down   |
| CALCOCO1 | -1.3433686 | 2.80444197 | 1.95E-39   | 5.86E-38 down   |
| CDH11    | -1.3431705 | 1.78022462 | 4.28E-17   | 3.68E-16 down   |
| FYN      | -1.3419418 | 2.48160415 | 1.17E-19   | 1.20E-18 down   |
| KCNH2    | -1.3416575 | 1.28933914 | 2.79E-13   | 1.78E-12 down   |
| SCN7A    | -1.340451  | 0.21552085 | 2.42E-54   | 1.55E-52 down   |
| CAP2     | -1.3396374 | 2.30505715 | 6.93E-25   | 9.90E-24 down   |
| HEG1     | -1.3362071 | 2.14467408 | 4.77E-26   | 7.39E-25 down   |
| ADCY9    | -1.3350499 | 1.17431595 | 4.40E-24   | 6.02E-23 down   |
| FNBP1    | -1.3333112 | 3.19064984 | 8.23E-20   | 8.59E-19 down   |
| GNG12    | -1.3310736 | 3.83152382 | 5.95E-19   | 5.80E-18 down   |
| SCN4B    | -1.3280072 | 0.46165104 | 3.40E-51   | 1.87E-49 down   |
| KCTD15   | -1.3276572 | 2.05458839 | 8.72E-16   | 6.79E-15 down   |
| PCDHB5   | -1.3274325 | 0.65272757 | 3.87E-25   | 5.62E-24 down   |
| OVGP1    | -1.3271551 | 2.55913794 | 0.00255831 | 0.00548981 down |
| BAG2     | -1.3267669 | 1.91105519 | 3.98E-20   | 4.25E-19 down   |
| ESAM     | -1.324631  | 2.98204009 | 4.21E-24   | 5.78E-23 down   |
| BHMT2    | -1.3236604 | 0.83280408 | 7.86E-17   | 6.67E-16 down   |
| STK26    | -1.3225527 | 2.36925407 | 2.45E-12   | 1.44E-11 down   |
| SH3D19   | -1.3212109 | 2.23848498 | 2.69E-29   | 4.92E-28 down   |
| GADD45G  | -1.3211411 | 3.47634408 | 1.65E-10   | 8.24E-10 down   |
| HOXD10   | -1.3204603 | 1.86170843 | 5.15E-14   | 3.48E-13 down   |
| RBMS3    | -1.3192512 | 0.71474346 | 2.69E-45   | 1.04E-43 down   |
| MYC      | -1.3188351 | 3.94898185 | 5.01E-10   | 2.41E-09 down   |
| RNF144A  | -1.3169872 | 2.31005153 | 5.14E-25   | 7.42E-24 down   |
| TMEM43   | -1.3149146 | 4.45843173 | 6.58E-42   | 2.18E-40 down   |

|          |            |            |          |            |      |
|----------|------------|------------|----------|------------|------|
| MEOX1    | -1.3147047 | 0.98835415 | 1.76E-11 | 9.65E-11   | down |
| RBFOX2   | -1.3144133 | 3.05913543 | 1.20E-37 | 3.32E-36   | down |
| WIPF3    | -1.3143897 | 1.11574165 | 4.76E-29 | 8.66E-28   | down |
| MAOA     | -1.3128708 | 2.19177529 | 1.77E-14 | 1.24E-13   | down |
| SLC7A8   | -1.3119224 | 2.7884081  | 1.33E-08 | 5.53E-08   | down |
| SLCO2A1  | -1.3108574 | 2.61704408 | 5.24E-09 | 2.29E-08   | down |
| NAP1L5   | -1.3107633 | 1.50304249 | 1.92E-34 | 4.57E-33   | down |
| ZMYM6NB  | -1.309668  | 1.72750865 | 2.60E-23 | 3.42E-22   | down |
| GPR116   | -1.3094349 | 1.52628083 | 8.00E-30 | 1.52E-28   | down |
| PCDHB15  | -1.3091072 | 0.61105781 | 3.70E-53 | 2.20E-51   | down |
| GJC2     | -1.3088329 | 1.2991777  | 2.94E-16 | 2.38E-15   | down |
| EHBP1    | -1.3085293 | 2.18469007 | 2.61E-45 | 1.02E-43   | down |
| SOX7     | -1.3074321 | 0.89059915 | 1.80E-34 | 4.30E-33   | down |
| FOXN3    | -1.3071441 | 1.97621917 | 4.76E-39 | 1.41E-37   | down |
| TFPI     | -1.3063422 | 1.03847615 | 1.63E-17 | 1.44E-16   | down |
| ZEB2     | -1.3044063 | 0.68760065 | 2.83E-54 | 1.79E-52   | down |
| LYNX1    | -1.3034026 | 1.6360142  | 1.36E-09 | 6.28E-09   | down |
| COL3A1   | -1.3030362 | 6.25380687 | 5.55E-07 | 1.95E-06   | down |
| NR4A3    | -1.3025922 | 0.61413225 | 9.51E-25 | 1.35E-23   | down |
| SETBP1   | -1.3008736 | 1.06666469 | 2.56E-36 | 6.67E-35   | down |
| FNDC5    | -1.3007459 | 0.60959853 | 3.01E-35 | 7.38E-34   | down |
| HSD17B14 | -1.3001046 | 2.91756298 | 2.15E-10 | 1.06E-09   | down |
| RUNX1T1  | -1.2992171 | 0.38019647 | 3.64E-73 | 5.56E-71   | down |
| GRK5     | -1.2968882 | 1.00982214 | 1.27E-43 | 4.51E-42   | down |
| CCDC8    | -1.2964945 | 3.26238659 | 1.41E-07 | 5.29E-07   | down |
| CDIP1    | -1.2963228 | 2.61561056 | 5.85E-22 | 7.07E-21   | down |
| IFI16    | -1.2940656 | 3.49858937 | 9.64E-11 | 4.95E-10   | down |
| ECM1     | -1.2928651 | 3.3110033  | 6.28E-08 | 2.44E-07   | down |
| MYZAP    | -1.2919449 | 0.54043058 | 1.68E-69 | 2.15E-67   | down |
| COL5A1   | -1.2915515 | 3.25993055 | 7.42E-11 | 3.85E-10   | down |
| NGFR     | -1.291005  | 0.64511366 | 5.33E-22 | 6.47E-21   | down |
| GLIPR2   | -1.2904769 | 3.36804457 | 3.92E-13 | 2.46E-12   | down |
| OTUD1    | -1.2902078 | 2.29300861 | 1.15E-22 | 1.46E-21   | down |
| NRIP2    | -1.2897935 | 1.42243201 | 6.90E-41 | 2.20E-39   | down |
| FAM110B  | -1.2894536 | 1.23053185 | 1.43E-14 | 1.01E-13   | down |
| PDGFD    | -1.2887252 | 1.88078486 | 7.45E-15 | 5.39E-14   | down |
| RAB9B    | -1.2877967 | 0.49580948 | 3.66E-63 | 3.55E-61   | down |
| ARHGAP31 | -1.287101  | 1.15947839 | 4.67E-42 | 1.56E-40   | down |
| TMEM35   | -1.2869826 | 1.13193468 | 1.02E-20 | 1.14E-19   | down |
| ANK2     | -1.2853845 | 0.81431268 | 6.14E-27 | 1.00E-25   | down |
| CCDC184  | -1.2850684 | 0.86763923 | 1.80E-34 | 4.30E-33   | down |
| INSR     | -1.2847674 | 2.65071915 | 7.01E-25 | 1.00E-23   | down |
| EVC      | -1.2841239 | 1.53732694 | 4.57E-27 | 7.54E-26   | down |
| S1PR3    | -1.2830023 | 1.45899244 | 2.60E-27 | 4.34E-26   | down |
| LDOC1    | -1.2817486 | 4.41856599 | 4.10E-05 | 0.00011552 | down |

|           |            |            |           |                |
|-----------|------------|------------|-----------|----------------|
| C10orf10  | -1.2802653 | 3.78844578 | 3.35E-11  | 1.79E-10 down  |
| NPTXR     | -1.2778336 | 2.24010381 | 6.20E-09  | 2.69E-08 down  |
| PDLIM7    | -1.2776949 | 4.42232684 | 2.21E-16  | 1.80E-15 down  |
| SEPT10    | -1.2773747 | 2.90005863 | 1.34E-21  | 1.58E-20 down  |
| WASF3     | -1.2772433 | 1.41310287 | 2.78E-21  | 3.22E-20 down  |
| ARHGAP20  | -1.2772028 | 0.22874411 | 5.31E-122 | 1.31E-118 down |
| PTPN21    | -1.2762411 | 1.72173714 | 5.12E-34  | 1.18E-32 down  |
| CNTNAP1   | -1.2754083 | 1.43151268 | 1.79E-26  | 2.84E-25 down  |
| POLR2M    | -1.2752062 | 1.97127369 | 8.85E-41  | 2.81E-39 down  |
| CYP2U1    | -1.2744032 | 1.16752523 | 5.40E-48  | 2.46E-46 down  |
| RGN       | -1.2742266 | 0.64993733 | 1.41E-25  | 2.12E-24 down  |
| TCF4      | -1.2739529 | 1.65103097 | 2.53E-25  | 3.71E-24 down  |
| NPY1R     | -1.2732769 | 0.52241102 | 1.56E-24  | 2.18E-23 down  |
| EPB41L3   | -1.2729927 | 1.02142626 | 3.80E-38  | 1.08E-36 down  |
| ERG       | -1.2728186 | 1.24778659 | 3.21E-27  | 5.33E-26 down  |
| CYTL1     | -1.272174  | 1.15877517 | 1.30E-08  | 5.44E-08 down  |
| ANGPTL2   | -1.2720378 | 3.15584724 | 4.45E-15  | 3.28E-14 down  |
| OSR1      | -1.2716149 | 0.57667568 | 6.54E-25  | 9.35E-24 down  |
| RAB11FIP2 | -1.2703455 | 2.05446987 | 2.39E-17  | 2.08E-16 down  |
| MPDZ      | -1.2695848 | 1.38206751 | 6.79E-35  | 1.64E-33 down  |
| INPP5A    | -1.2687589 | 2.77994868 | 1.35E-37  | 3.71E-36 down  |
| SSBP2     | -1.2673755 | 1.39219295 | 5.02E-34  | 1.16E-32 down  |
| SLC51B    | -1.2667717 | 0.79423208 | 1.21E-19  | 1.25E-18 down  |
| PTGER2    | -1.2658823 | 1.31579708 | 5.85E-19  | 5.71E-18 down  |
| GNAZ      | -1.2641961 | 1.51539224 | 6.10E-21  | 6.92E-20 down  |
| PPP1R16B  | -1.2641358 | 0.85948151 | 3.44E-35  | 8.41E-34 down  |
| ZNF502    | -1.2638628 | 0.90991176 | 1.45E-24  | 2.04E-23 down  |
| MGARP     | -1.2618021 | 0.46622277 | 1.15E-51  | 6.48E-50 down  |
| CCDC89    | -1.2614656 | 0.81558147 | 4.14E-24  | 5.68E-23 down  |
| PALMD     | -1.2608885 | 1.89109262 | 1.08E-13  | 7.13E-13 down  |
| CRY2      | -1.2606917 | 2.70431325 | 1.55E-35  | 3.88E-34 down  |
| LPAR6     | -1.2595205 | 2.07597405 | 1.01E-18  | 9.69E-18 down  |
| ADCY5     | -1.2582679 | 1.390814   | 1.28E-16  | 1.07E-15 down  |
| CFD       | -1.2580885 | 2.55087402 | 3.93E-08  | 1.56E-07 down  |
| ACACB     | -1.2571617 | 0.93111472 | 8.02E-49  | 3.82E-47 down  |
| MAP3K3    | -1.2564963 | 2.32511913 | 1.05E-43  | 3.76E-42 down  |
| PPP2R2C   | -1.2563707 | 1.55983662 | 1.30E-09  | 6.04E-09 down  |
| VCL       | -1.2549628 | 3.99576883 | 4.20E-20  | 4.47E-19 down  |
| CD22      | -1.2541533 | 0.73208477 | 1.27E-16  | 1.06E-15 down  |
| ARHGEF6   | -1.2522884 | 1.22339197 | 6.49E-35  | 1.57E-33 down  |
| FEZ1      | -1.2522133 | 0.82378952 | 2.18E-41  | 7.11E-40 down  |
| FLI1      | -1.2519916 | 1.07519303 | 2.59E-37  | 7.09E-36 down  |
| SBDS      | -1.2508435 | 4.45370086 | 1.83E-25  | 2.73E-24 down  |
| GREB1     | -1.2494901 | 2.2126687  | 4.55E-11  | 2.41E-10 down  |
| GABARAPI  | -1.2489335 | 3.06542501 | 1.69E-16  | 1.39E-15 down  |

|          |            |            |          |               |
|----------|------------|------------|----------|---------------|
| MAN1A1   | -1.2481366 | 2.5377596  | 3.89E-09 | 1.72E-08 down |
| NR3C2    | -1.2476299 | 0.84900226 | 2.13E-34 | 5.04E-33 down |
| NRP1     | -1.2466958 | 2.66026083 | 2.67E-14 | 1.85E-13 down |
| PLXDC2   | -1.2464656 | 1.76804845 | 1.86E-16 | 1.53E-15 down |
| ABLIM3   | -1.2458214 | 0.52086536 | 3.19E-47 | 1.37E-45 down |
| EGR2     | -1.2455161 | 1.35474556 | 2.02E-20 | 2.19E-19 down |
| FAM198A  | -1.2452796 | 0.97301397 | 1.27E-22 | 1.60E-21 down |
| CRTAP    | -1.2441212 | 4.59625398 | 1.34E-37 | 3.71E-36 down |
| PHLDB2   | -1.2430951 | 0.93830112 | 2.14E-22 | 2.66E-21 down |
| GLI2     | -1.2428143 | 0.49348064 | 6.66E-50 | 3.41E-48 down |
| CCM2L    | -1.2420714 | 1.17801089 | 6.80E-28 | 1.17E-26 down |
| MAMSTR   | -1.2407865 | 1.34104047 | 6.25E-18 | 5.68E-17 down |
| PCDHGC3  | -1.2391266 | 1.46410712 | 2.10E-18 | 1.98E-17 down |
| EPHX2    | -1.2389386 | 2.13668546 | 6.66E-16 | 5.24E-15 down |
| SLC7A3   | -1.2367436 | 0.63788588 | 2.64E-23 | 3.47E-22 down |
| NBEA     | -1.2358203 | 0.56544885 | 1.42E-41 | 4.68E-40 down |
| HIPK3    | -1.2356378 | 3.1912853  | 2.12E-23 | 2.80E-22 down |
| GDF7     | -1.2355472 | 0.56319999 | 6.23E-28 | 1.07E-26 down |
| CREBRF   | -1.234711  | 1.2100543  | 2.53E-50 | 1.32E-48 down |
| P3H2     | -1.2341835 | 1.68493848 | 5.77E-13 | 3.57E-12 down |
| MEOX2    | -1.2338286 | 0.27502753 | 4.21E-28 | 7.33E-27 down |
| AMOTL2   | -1.2334413 | 3.40518327 | 4.96E-16 | 3.94E-15 down |
| AMIGO2   | -1.2326345 | 2.48311581 | 6.64E-08 | 2.58E-07 down |
| RPS6KA2  | -1.2325495 | 2.65762222 | 1.07E-25 | 1.63E-24 down |
| PDPN     | -1.2316117 | 2.00067008 | 4.38E-10 | 2.12E-09 down |
| ZYX      | -1.2313373 | 6.18117629 | 1.04E-26 | 1.67E-25 down |
| NCS1     | -1.230148  | 3.06715178 | 6.46E-17 | 5.51E-16 down |
| GLI1     | -1.2297253 | 0.74184724 | 4.98E-24 | 6.79E-23 down |
| SNX21    | -1.2262576 | 2.12171134 | 1.22E-39 | 3.72E-38 down |
| PCDHB4   | -1.2249332 | 0.65225886 | 1.48E-45 | 5.84E-44 down |
| NR4A2    | -1.2245488 | 1.99922256 | 4.47E-13 | 2.79E-12 down |
| STARD13  | -1.2234647 | 1.42382112 | 7.57E-37 | 2.02E-35 down |
| GSTM2    | -1.2231359 | 1.20782348 | 5.20E-20 | 5.51E-19 down |
| FAM49A   | -1.2229425 | 1.0471246  | 5.80E-36 | 1.48E-34 down |
| MPRIP    | -1.2218538 | 2.98299403 | 2.23E-43 | 7.90E-42 down |
| KLHDC1   | -1.2198075 | 0.63239041 | 3.74E-82 | 8.88E-80 down |
| MOB3B    | -1.2187356 | 1.8103937  | 2.15E-24 | 2.99E-23 down |
| CSGALNAC | -1.2180972 | 1.19904383 | 1.41E-25 | 2.12E-24 down |
| SLC9A9   | -1.2171766 | 0.79124158 | 2.76E-47 | 1.20E-45 down |
| EFEMP2   | -1.2122774 | 3.61634135 | 2.93E-09 | 1.32E-08 down |
| STX2     | -1.2117453 | 1.88211373 | 3.29E-22 | 4.03E-21 down |
| NACAD    | -1.2109602 | 1.12570494 | 1.08E-19 | 1.12E-18 down |
| ABO      | -1.210638  | 0.91396746 | 4.70E-12 | 2.71E-11 down |
| NTN4     | -1.2102516 | 2.55301982 | 2.80E-11 | 1.51E-10 down |
| CHPT1    | -1.2097867 | 1.64301027 | 2.08E-24 | 2.90E-23 down |

|          |            |            |           |                 |
|----------|------------|------------|-----------|-----------------|
| MAMLD1   | -1.2096167 | 1.07699126 | 3.28E-23  | 4.28E-22 down   |
| PTPRB    | -1.2093643 | 1.03626988 | 7.02E-33  | 1.54E-31 down   |
| EPAS1    | -1.2093328 | 3.85429821 | 1.82E-13  | 1.18E-12 down   |
| ZNF516   | -1.2088245 | 3.03543514 | 5.67E-10  | 2.71E-09 down   |
| AKNA     | -1.2063289 | 2.37384385 | 5.61E-24  | 7.61E-23 down   |
| SPON1    | -1.205033  | 3.61959797 | 0.0021688 | 0.00470934 down |
| RCBTB2   | -1.2050113 | 2.32234285 | 5.24E-28  | 9.06E-27 down   |
| KATNAL1  | -1.2046889 | 0.97464855 | 2.20E-53  | 1.32E-51 down   |
| ADARB1   | -1.2042649 | 1.27334562 | 5.06E-43  | 1.76E-41 down   |
| PARVA    | -1.2042144 | 3.51952768 | 3.27E-35  | 8.00E-34 down   |
| LCN6     | -1.2038863 | 0.17197622 | 4.09E-56  | 2.85E-54 down   |
| NYNRIN   | -1.2035336 | 2.54663972 | 5.48E-11  | 2.88E-10 down   |
| AASS     | -1.2034447 | 0.8728184  | 2.77E-35  | 6.81E-34 down   |
| TGFB3    | -1.20292   | 2.00360621 | 2.29E-18  | 2.15E-17 down   |
| NR1D2    | -1.2020725 | 2.73646173 | 8.91E-24  | 1.19E-22 down   |
| NLGN2    | -1.2015059 | 2.9469885  | 3.89E-15  | 2.88E-14 down   |
| TAGAP    | -1.2013805 | 0.8731492  | 1.95E-29  | 3.61E-28 down   |
| PLCL1    | -1.2009632 | 0.30783885 | 2.92E-86  | 8.99E-84 down   |
| STARD8   | -1.1994707 | 0.91306701 | 3.53E-42  | 1.19E-40 down   |
| FAM50B   | -1.1989675 | 2.29319635 | 3.01E-11  | 1.62E-10 down   |
| NAALADL1 | -1.1989438 | 0.87751128 | 1.57E-34  | 3.75E-33 down   |
| KLF11    | -1.1970174 | 2.14272709 | 9.48E-23  | 1.21E-21 down   |
| EGR3     | -1.1968864 | 1.41051448 | 1.40E-11  | 7.71E-11 down   |
| NFATC4   | -1.1967977 | 2.57902653 | 1.04E-17  | 9.29E-17 down   |
| SH2D3C   | -1.1959673 | 1.92787273 | 1.47E-22  | 1.84E-21 down   |
| GAS7     | -1.1959078 | 1.94739582 | 4.26E-15  | 3.14E-14 down   |
| HIGD1B   | -1.1958964 | 0.96390768 | 3.08E-33  | 6.91E-32 down   |
| LRCH1    | -1.1958843 | 1.76491737 | 7.00E-37  | 1.87E-35 down   |
| TMEM98   | -1.1954838 | 3.75346107 | 5.34E-11  | 2.82E-10 down   |
| PKIG     | -1.1953655 | 4.50904062 | 2.89E-24  | 3.99E-23 down   |
| PTPN13   | -1.1947521 | 1.52943871 | 1.35E-13  | 8.80E-13 down   |
| CSRNP1   | -1.1945096 | 3.95919076 | 4.76E-17  | 4.08E-16 down   |
| HSPA1A   | -1.1938554 | 3.9838754  | 1.75E-06  | 5.81E-06 down   |
| CADM3    | -1.1938495 | 0.51711536 | 2.05E-16  | 1.68E-15 down   |
| PRLR     | -1.193499  | 1.03802496 | 1.35E-16  | 1.12E-15 down   |
| TBC1D1   | -1.1932251 | 3.34739896 | 9.18E-28  | 1.57E-26 down   |
| MEF2A    | -1.1919088 | 2.48169726 | 1.10E-27  | 1.87E-26 down   |
| ZNF835   | -1.1910956 | 0.36469609 | 5.95E-57  | 4.40E-55 down   |
| CNTN4    | -1.1903625 | 0.50815768 | 1.19E-40  | 3.75E-39 down   |
| SERP2    | -1.1900853 | 1.11112373 | 9.78E-32  | 2.05E-30 down   |
| F8       | -1.1897897 | 0.78259441 | 1.71E-56  | 1.21E-54 down   |
| JUNB     | -1.18948   | 6.52544933 | 2.51E-10  | 1.24E-09 down   |
| MCC      | -1.1881372 | 1.5038584  | 8.15E-14  | 5.43E-13 down   |
| FOXJ2    | -1.1875593 | 2.22118322 | 7.60E-38  | 2.14E-36 down   |
| NRP2     | -1.1856508 | 2.2597758  | 5.29E-11  | 2.79E-10 down   |

|          |            |            |           |                |
|----------|------------|------------|-----------|----------------|
| LINGO2   | -1.1853305 | 0.31372359 | 1.55E-35  | 3.88E-34 down  |
| ZBTB16   | -1.1852013 | 0.16693792 | 5.56E-97  | 2.96E-94 down  |
| HOXA11   | -1.1838365 | 2.66508149 | 3.07E-06  | 9.89E-06 down  |
| TWSG1    | -1.1829896 | 3.66490719 | 1.90E-14  | 1.33E-13 down  |
| WSCD2    | -1.1810255 | 0.27019147 | 8.60E-44  | 3.08E-42 down  |
| NFIX     | -1.1794349 | 4.27745873 | 1.34E-07  | 5.05E-07 down  |
| IFI27L2  | -1.1787777 | 2.87940737 | 2.49E-10  | 1.22E-09 down  |
| FAM8A1   | -1.1782748 | 3.07045043 | 1.00E-25  | 1.53E-24 down  |
| IL11RA   | -1.1774451 | 1.50648644 | 2.53E-23  | 3.33E-22 down  |
| ZNF662   | -1.1768221 | 0.71128305 | 4.93E-25  | 7.13E-24 down  |
| SLC16A11 | -1.1759833 | 0.59504379 | 9.24E-22  | 1.10E-20 down  |
| LTBP2    | -1.1745494 | 2.78210521 | 1.34E-11  | 7.43E-11 down  |
| ALDH1B1  | -1.1745075 | 3.7828351  | 6.85E-20  | 7.16E-19 down  |
| KLF15    | -1.1742522 | 1.48588968 | 9.53E-18  | 8.53E-17 down  |
| CTF1     | -1.1736967 | 2.89447709 | 1.05E-13  | 6.95E-13 down  |
| PPP1R12A | -1.1731122 | 2.18630986 | 7.37E-30  | 1.40E-28 down  |
| ASPA     | -1.1727671 | 0.12486013 | 6.95E-169 | 1.37E-164 down |
| TSC22D3  | -1.1726979 | 3.59839002 | 1.86E-14  | 1.30E-13 down  |
| SELE     | -1.1713926 | 0.40685983 | 1.31E-26  | 2.08E-25 down  |
| TLN1     | -1.1694259 | 5.05307153 | 1.87E-27  | 3.15E-26 down  |
| KLHL4    | -1.1685591 | 0.13223145 | 4.95E-134 | 3.25E-130 down |
| FIGF     | -1.1681476 | 0.31167862 | 3.16E-49  | 1.55E-47 down  |
| RASIP1   | -1.1672202 | 2.23641435 | 2.25E-12  | 1.33E-11 down  |
| SVEP1    | -1.1669834 | 0.81544534 | 5.52E-27  | 9.04E-26 down  |
| TMEM64   | -1.1667681 | 1.64720908 | 3.36E-19  | 3.33E-18 down  |
| CLIP4    | -1.1661124 | 1.36526129 | 1.33E-21  | 1.56E-20 down  |
| ST3GAL5  | -1.1652263 | 1.55683655 | 1.25E-20  | 1.39E-19 down  |
| IQSEC3   | -1.1649131 | 0.47053163 | 8.27E-32  | 1.74E-30 down  |
| PIK3IP1  | -1.1638051 | 3.09593906 | 1.84E-21  | 2.16E-20 down  |
| CIRBP    | -1.1634459 | 5.2650667  | 1.99E-22  | 2.47E-21 down  |
| FAP      | -1.1627375 | 0.8683213  | 5.76E-22  | 6.97E-21 down  |
| C11orf95 | -1.1626896 | 2.57432075 | 2.31E-25  | 3.41E-24 down  |
| EPM2AIP1 | -1.1623906 | 2.02132931 | 2.05E-11  | 1.12E-10 down  |
| DAAM2    | -1.1614964 | 1.49274627 | 1.59E-17  | 1.40E-16 down  |
| GNAO1    | -1.1611791 | 0.41445305 | 2.87E-50  | 1.49E-48 down  |
| HVCN1    | -1.1610905 | 1.027622   | 3.57E-41  | 1.15E-39 down  |
| BCL2L2   | -1.1585795 | 2.8606082  | 9.73E-28  | 1.66E-26 down  |
| RAP2C    | -1.1562602 | 2.71465865 | 1.88E-21  | 2.19E-20 down  |
| CPXM2    | -1.1562113 | 1.83105896 | 2.53E-06  | 8.25E-06 down  |
| NACC2    | -1.1556815 | 2.35292644 | 3.17E-23  | 4.14E-22 down  |
| THSD1    | -1.1554827 | 0.97681278 | 3.90E-38  | 1.11E-36 down  |
| MICU3    | -1.155028  | 0.60286416 | 4.60E-34  | 1.07E-32 down  |
| CACNB2   | -1.1545797 | 0.32830121 | 3.46E-101 | 2.20E-98 down  |
| TRANK1   | -1.1545463 | 1.60610435 | 2.94E-26  | 4.60E-25 down  |
| B4GAT1   | -1.1529274 | 3.64697631 | 2.19E-25  | 3.23E-24 down  |

|          |            |            |          |               |
|----------|------------|------------|----------|---------------|
| VEGFC    | -1.1522348 | 2.22685256 | 1.71E-14 | 1.20E-13 down |
| PHF1     | -1.1518074 | 3.92557057 | 6.78E-35 | 1.64E-33 down |
| POU6F1   | -1.1517043 | 1.2504527  | 4.48E-47 | 1.91E-45 down |
| CTSG     | -1.1513338 | 0.24108367 | 4.61E-46 | 1.86E-44 down |
| MMP19    | -1.1508438 | 1.16723079 | 2.75E-23 | 3.60E-22 down |
| ZFP36L1  | -1.1507484 | 6.38303157 | 6.31E-15 | 4.58E-14 down |
| TSPAN5   | -1.1490566 | 1.63150461 | 7.04E-15 | 5.10E-14 down |
| ACTN1    | -1.14905   | 4.42507628 | 4.23E-23 | 5.46E-22 down |
| ZBTB47   | -1.1480822 | 2.59888463 | 4.40E-25 | 6.37E-24 down |
| MTURN    | -1.1477649 | 2.66956438 | 8.46E-16 | 6.60E-15 down |
| PFKM     | -1.1466084 | 2.62951515 | 9.45E-16 | 7.33E-15 down |
| SLC8A2   | -1.1464251 | 0.29096769 | 8.73E-53 | 5.03E-51 down |
| MBNL1    | -1.145739  | 3.19517672 | 6.37E-28 | 1.10E-26 down |
| RASGRP2  | -1.1446169 | 0.75674609 | 1.52E-39 | 4.59E-38 down |
| RAB12    | -1.1440466 | 3.3413507  | 3.69E-23 | 4.79E-22 down |
| MAP7D3   | -1.1437628 | 1.07317021 | 1.28E-32 | 2.77E-31 down |
| OSBPL5   | -1.1435706 | 2.1900491  | 7.73E-27 | 1.25E-25 down |
| RGL1     | -1.1432701 | 2.45270683 | 1.24E-15 | 9.51E-15 down |
| CLEC1A   | -1.1432063 | 0.74143763 | 1.33E-49 | 6.70E-48 down |
| ZNF486   | -1.1430764 | 0.89813804 | 1.04E-10 | 5.31E-10 down |
| SCARA5   | -1.1430453 | 0.17939377 | 2.24E-47 | 9.78E-46 down |
| DCAF12L2 | -1.1427129 | 0.34245059 | 4.94E-37 | 1.34E-35 down |
| ADHFE1   | -1.1421029 | 0.73321675 | 1.51E-30 | 2.99E-29 down |
| POPDC2   | -1.1411297 | 0.92349501 | 9.83E-46 | 3.91E-44 down |
| PRKD1    | -1.1395861 | 1.2349815  | 2.28E-26 | 3.59E-25 down |
| ZBTB46   | -1.1394877 | 1.61498861 | 1.55E-22 | 1.94E-21 down |
| HOXD11   | -1.139431  | 0.79126335 | 1.76E-12 | 1.05E-11 down |
| PNRC1    | -1.1394227 | 4.71809176 | 1.04E-25 | 1.58E-24 down |
| PRICKLE1 | -1.1391105 | 0.92772091 | 1.34E-28 | 2.39E-27 down |
| PPP1R12C | -1.1388966 | 3.36807263 | 1.20E-37 | 3.34E-36 down |
| CD97     | -1.1381493 | 3.95562952 | 2.47E-12 | 1.45E-11 down |
| ST13     | -1.1379213 | 5.40652936 | 5.48E-22 | 6.65E-21 down |
| CD302    | -1.137686  | 0.59305992 | 1.13E-49 | 5.73E-48 down |
| FAM180A  | -1.1376333 | 0.3001253  | 3.06E-55 | 2.04E-53 down |
| FRY      | -1.1375121 | 0.72114731 | 2.75E-50 | 1.43E-48 down |
| RNF38    | -1.1355497 | 2.70909726 | 1.16E-26 | 1.86E-25 down |
| DFNA5    | -1.1355275 | 0.96689437 | 7.79E-33 | 1.71E-31 down |
| PINLYP   | -1.1346414 | 0.66463624 | 2.62E-45 | 1.02E-43 down |
| NPNT     | -1.1337952 | 1.92988268 | 2.41E-08 | 9.78E-08 down |
| ESD      | -1.1324058 | 4.20755966 | 3.30E-19 | 3.28E-18 down |
| EMILIN3  | -1.1323281 | 0.6888939  | 1.29E-18 | 1.23E-17 down |
| AVPR2    | -1.1313779 | 0.59302371 | 2.21E-17 | 1.93E-16 down |
| KIRREL   | -1.1297665 | 2.49495673 | 8.71E-12 | 4.89E-11 down |
| SORBS3   | -1.1293894 | 3.97112374 | 6.79E-11 | 3.54E-10 down |
| ADCY4    | -1.1290905 | 1.17421583 | 6.80E-23 | 8.74E-22 down |

|           |            |            |            |                 |
|-----------|------------|------------|------------|-----------------|
| C1QTNF2   | -1.1289126 | 0.46330859 | 6.07E-57   | 4.46E-55 down   |
| ZNF853    | -1.1287724 | 2.34767776 | 2.73E-15   | 2.05E-14 down   |
| PKD1      | -1.1271504 | 2.23399654 | 2.12E-28   | 3.72E-27 down   |
| PPM1F     | -1.1265659 | 1.85064675 | 1.26E-44   | 4.82E-43 down   |
| GAB1      | -1.1260802 | 1.43884213 | 3.47E-31   | 7.09E-30 down   |
| DMPK      | -1.1242507 | 2.89960894 | 1.15E-20   | 1.28E-19 down   |
| CPXM1     | -1.1241174 | 4.26637704 | 6.74E-06   | 2.09E-05 down   |
| PECAM1    | -1.1233956 | 3.33951142 | 4.34E-15   | 3.20E-14 down   |
| TMOD2     | -1.1226578 | 0.46610343 | 1.89E-65   | 2.02E-63 down   |
| KDELC2    | -1.1224018 | 2.93335849 | 1.70E-15   | 1.30E-14 down   |
| KLF7      | -1.1219509 | 1.34853732 | 1.15E-29   | 2.16E-28 down   |
| SOBP      | -1.121545  | 0.92183738 | 2.28E-19   | 2.30E-18 down   |
| LRRC2     | -1.1213493 | 0.46640836 | 5.21E-44   | 1.88E-42 down   |
| RIC3      | -1.1213059 | 0.23337092 | 1.34E-77   | 2.76E-75 down   |
| ITIH5     | -1.1198947 | 1.39805033 | 2.06E-09   | 9.39E-09 down   |
| ADCY3     | -1.1190593 | 2.11033017 | 7.64E-19   | 7.40E-18 down   |
| GHR       | -1.1184295 | 0.31138602 | 2.43E-83   | 6.40E-81 down   |
| ITGA9     | -1.117665  | 1.71215846 | 2.60E-11   | 1.41E-10 down   |
| FAM63B    | -1.1167575 | 1.50809952 | 3.65E-28   | 6.37E-27 down   |
| SLC8A1    | -1.1165832 | 0.6915585  | 1.84E-25   | 2.74E-24 down   |
| GALNT15   | -1.1156405 | 0.33663871 | 1.09E-41   | 3.59E-40 down   |
| C2orf74   | -1.1150551 | 0.52949569 | 3.55E-35   | 8.67E-34 down   |
| GARNL3    | -1.1148023 | 0.60188935 | 1.95E-70   | 2.62E-68 down   |
| AHNAK2    | -1.1147602 | 1.45897835 | 2.94E-09   | 1.32E-08 down   |
| RBMS1     | -1.1145764 | 2.3908531  | 2.04E-20   | 2.22E-19 down   |
| PLXDC1    | -1.114016  | 1.10682898 | 1.25E-31   | 2.61E-30 down   |
| HOXA5     | -1.1137614 | 2.31839846 | 8.86E-05   | 0.00023874 down |
| SATB1     | -1.1120627 | 1.01636823 | 1.62E-18   | 1.54E-17 down   |
| LATS2     | -1.1116913 | 2.02799278 | 7.73E-25   | 1.10E-23 down   |
| LYSMD2    | -1.1116368 | 1.73508141 | 1.58E-19   | 1.61E-18 down   |
| ITGB1BP2  | -1.1115811 | 0.57363573 | 5.34E-46   | 2.15E-44 down   |
| C3orf18   | -1.1102934 | 1.55669151 | 9.95E-26   | 1.52E-24 down   |
| PDLIM4    | -1.1100948 | 3.36362271 | 4.48E-09   | 1.97E-08 down   |
| ZNF302    | -1.1097985 | 2.05867145 | 2.64E-16   | 2.15E-15 down   |
| MYOC      | -1.1095532 | 0.85267751 | 2.28E-12   | 1.35E-11 down   |
| MAGEE1    | -1.1094126 | 1.04150104 | 1.53E-24   | 2.14E-23 down   |
| DNAJB5    | -1.1086336 | 1.6318718  | 6.11E-21   | 6.93E-20 down   |
| RAB11FIP5 | -1.1076136 | 2.42192581 | 7.55E-24   | 1.01E-22 down   |
| BEX1      | -1.1073472 | 2.61339538 | 0.00077744 | 0.00181877 down |
| POMGNT2   | -1.1064624 | 3.70563215 | 2.55E-17   | 2.21E-16 down   |
| PCDHB7    | -1.106123  | 0.66020381 | 4.69E-29   | 8.55E-28 down   |
| HDAC5     | -1.1042092 | 3.22092088 | 1.19E-26   | 1.91E-25 down   |
| CLEC11A   | -1.1016841 | 3.50725659 | 1.83E-09   | 8.37E-09 down   |
| PYGO1     | -1.1011678 | 0.90059176 | 7.89E-22   | 9.47E-21 down   |
| ACSS3     | -1.0996825 | 0.9243588  | 4.18E-18   | 3.86E-17 down   |



|          |            |            |            |                 |
|----------|------------|------------|------------|-----------------|
| ARRDC4   | -1.0966547 | 2.45848626 | 2.80E-13   | 1.78E-12 down   |
| TMEM252  | -1.0964821 | 0.86469074 | 3.80E-09   | 1.69E-08 down   |
| MACF1    | -1.0964441 | 2.23810743 | 9.85E-27   | 1.59E-25 down   |
| LEPROT   | -1.0959892 | 3.90569809 | 1.43E-27   | 2.41E-26 down   |
| ZC2HC1A  | -1.0959335 | 1.81696242 | 1.46E-19   | 1.49E-18 down   |
| SCARF1   | -1.0944204 | 1.31276336 | 1.17E-37   | 3.25E-36 down   |
| NR1D1    | -1.0922374 | 3.09492451 | 1.91E-18   | 1.80E-17 down   |
| BTG1     | -1.0919982 | 4.45657787 | 2.19E-22   | 2.71E-21 down   |
| ROR2     | -1.0905377 | 2.50349882 | 5.18E-09   | 2.26E-08 down   |
| FCER1A   | -1.0887711 | 0.77904498 | 3.87E-16   | 3.11E-15 down   |
| APH1B    | -1.0883438 | 1.4615989  | 3.25E-27   | 5.38E-26 down   |
| NEURL1   | -1.0872023 | 0.52744285 | 2.35E-17   | 2.04E-16 down   |
| BST1     | -1.0866186 | 0.87358859 | 3.08E-24   | 4.24E-23 down   |
| HBB      | -1.0856406 | 3.26668812 | 0.00027804 | 0.00069693 down |
| WISP1    | -1.0855058 | 0.90530099 | 2.19E-22   | 2.71E-21 down   |
| OAF      | -1.0847286 | 3.90661269 | 1.71E-15   | 1.30E-14 down   |
| RBM43    | -1.084509  | 1.57573952 | 4.34E-26   | 6.74E-25 down   |
| CBLN1    | -1.0844147 | 0.42297368 | 2.92E-22   | 3.58E-21 down   |
| RFX2     | -1.0842797 | 1.46926116 | 2.94E-13   | 1.87E-12 down   |
| PLA2R1   | -1.0834526 | 0.96035855 | 4.17E-30   | 8.03E-29 down   |
| SYT1     | -1.082606  | 0.61012205 | 3.06E-15   | 2.29E-14 down   |
| SMPDL3A  | -1.0816556 | 1.52517213 | 1.04E-16   | 8.73E-16 down   |
| TOM1L2   | -1.0810529 | 2.54870371 | 1.58E-28   | 2.79E-27 down   |
| TEAD1    | -1.0809865 | 2.6724961  | 1.02E-16   | 8.60E-16 down   |
| ENOX1    | -1.0809403 | 0.58736002 | 6.30E-33   | 1.39E-31 down   |
| LRRK2    | -1.0787273 | 0.34912646 | 5.18E-48   | 2.37E-46 down   |
| RBP5     | -1.078669  | 2.0866048  | 1.16E-14   | 8.22E-14 down   |
| SPON2    | -1.0783892 | 3.09297595 | 9.13E-09   | 3.88E-08 down   |
| LCA5     | -1.0782699 | 0.99638915 | 2.32E-23   | 3.06E-22 down   |
| WWTR1    | -1.0781319 | 3.13942226 | 2.73E-15   | 2.05E-14 down   |
| ELN      | -1.07803   | 2.60406097 | 9.47E-06   | 2.89E-05 down   |
| SAP30L   | -1.0779611 | 2.39791994 | 2.52E-50   | 1.32E-48 down   |
| MAP1A    | -1.0760287 | 1.53427685 | 1.32E-13   | 8.65E-13 down   |
| MXI1     | -1.0759951 | 3.2265051  | 8.82E-20   | 9.16E-19 down   |
| CREB3L2  | -1.0756475 | 3.17369121 | 1.39E-20   | 1.54E-19 down   |
| ARHGEF17 | -1.0755179 | 2.8825482  | 2.99E-20   | 3.22E-19 down   |
| VCAM1    | -1.0747794 | 1.18867834 | 1.38E-13   | 9.01E-13 down   |
| P2RY1    | -1.0745135 | 0.81973645 | 4.18E-33   | 9.32E-32 down   |
| PDCD4    | -1.0736709 | 4.16752362 | 1.71E-16   | 1.41E-15 down   |
| TTYH2    | -1.0734364 | 0.67535253 | 9.81E-36   | 2.48E-34 down   |
| ADAMTS10 | -1.073073  | 1.1252602  | 5.71E-19   | 5.59E-18 down   |
| ANKRD33B | -1.0720757 | 0.57663407 | 8.05E-22   | 9.64E-21 down   |
| MAP1B    | -1.0705687 | 2.00024702 | 1.16E-08   | 4.88E-08 down   |
| PRR16    | -1.0692065 | 0.87169263 | 4.67E-15   | 3.43E-14 down   |
| FOSL2    | -1.0682708 | 4.32054212 | 6.90E-14   | 4.61E-13 down   |

|          |            |            |          |                 |
|----------|------------|------------|----------|-----------------|
| HBEGF    | -1.0681519 | 1.77961006 | 5.55E-20 | 5.86E-19 down   |
| STEAP4   | -1.0675525 | 0.54022962 | 9.85E-24 | 1.32E-22 down   |
| NXPE3    | -1.0674727 | 0.93390634 | 3.89E-42 | 1.31E-40 down   |
| NIPAL2   | -1.0662011 | 1.74859705 | 4.81E-22 | 5.86E-21 down   |
| SNTB2    | -1.0660532 | 1.94156013 | 4.65E-26 | 7.21E-25 down   |
| TCF21    | -1.0648741 | 0.23556639 | 1.48E-39 | 4.49E-38 down   |
| KLF10    | -1.0644114 | 3.59679975 | 6.07E-15 | 4.41E-14 down   |
| MMP2     | -1.0637451 | 5.49382355 | 6.28E-05 | 0.00017252 down |
| PXDC1    | -1.0626997 | 3.0307142  | 5.96E-10 | 2.85E-09 down   |
| PRKACB   | -1.0626835 | 2.15608447 | 2.43E-18 | 2.27E-17 down   |
| CRISP2   | -1.0626827 | 0.22007223 | 5.12E-21 | 5.83E-20 down   |
| SRF      | -1.0604708 | 4.13006274 | 2.70E-31 | 5.55E-30 down   |
| SYNDIG1  | -1.0599807 | 0.98073651 | 2.32E-09 | 1.05E-08 down   |
| USP51    | -1.0594013 | 0.97480506 | 1.84E-28 | 3.24E-27 down   |
| NMNAT3   | -1.0589061 | 1.42895613 | 2.43E-17 | 2.11E-16 down   |
| SLC27A6  | -1.0582692 | 1.05892584 | 9.52E-11 | 4.89E-10 down   |
| CSPG4    | -1.0582508 | 1.67613087 | 1.64E-14 | 1.16E-13 down   |
| FAM89A   | -1.057122  | 1.59483319 | 5.49E-18 | 5.01E-17 down   |
| KLHDC8B  | -1.0568209 | 3.55082007 | 2.57E-17 | 2.23E-16 down   |
| ARHGEF26 | -1.0566773 | 0.95022603 | 1.87E-32 | 4.02E-31 down   |
| KIAA1377 | -1.0565915 | 0.76808734 | 2.28E-22 | 2.82E-21 down   |
| DLL1     | -1.0565889 | 1.67338456 | 1.06E-14 | 7.55E-14 down   |
| HRCT1    | -1.0562162 | 0.91870718 | 2.03E-15 | 1.54E-14 down   |
| FAM43A   | -1.0561741 | 2.22906399 | 1.95E-11 | 1.07E-10 down   |
| ARMCX4   | -1.0561372 | 0.56270072 | 1.13E-46 | 4.70E-45 down   |
| MEF2D    | -1.0561138 | 3.24854639 | 4.34E-28 | 7.54E-27 down   |
| FEM1B    | -1.05594   | 2.86515528 | 3.92E-30 | 7.56E-29 down   |
| TSPYL4   | -1.0558898 | 3.02568732 | 3.51E-19 | 3.48E-18 down   |
| CCL19    | -1.0554876 | 1.5507866  | 8.99E-06 | 2.75E-05 down   |
| TPPP     | -1.0553007 | 1.0307977  | 6.72E-12 | 3.81E-11 down   |
| MED13L   | -1.0549445 | 1.97458343 | 5.78E-24 | 7.83E-23 down   |
| YAP1     | -1.0543293 | 4.12762748 | 3.27E-15 | 2.43E-14 down   |
| EIF3L    | -1.0541673 | 4.95697204 | 6.02E-10 | 2.87E-09 down   |
| CCDC50   | -1.0534711 | 2.82887724 | 1.74E-27 | 2.92E-26 down   |
| EIF4B    | -1.0523456 | 5.51652876 | 1.44E-20 | 1.59E-19 down   |
| LIN7A    | -1.0511285 | 0.54215133 | 3.49E-25 | 5.08E-24 down   |
| KIAA1755 | -1.0504544 | 0.60091724 | 1.43E-36 | 3.75E-35 down   |
| CALCOCO2 | -1.0492188 | 2.88074435 | 1.73E-32 | 3.73E-31 down   |
| PDLIM5   | -1.0488661 | 3.21868617 | 6.22E-14 | 4.17E-13 down   |
| CREBL2   | -1.0483666 | 3.14032461 | 5.15E-25 | 7.43E-24 down   |
| SALL2    | -1.0479901 | 2.18279467 | 1.64E-09 | 7.54E-09 down   |
| CMYA5    | -1.0478011 | 0.48169115 | 7.72E-40 | 2.36E-38 down   |
| H6PD     | -1.0473953 | 3.50778126 | 5.37E-24 | 7.30E-23 down   |
| HTRA1    | -1.0471073 | 5.709765   | 2.96E-09 | 1.33E-08 down   |
| GATA2    | -1.0455136 | 3.22545192 | 1.22E-05 | 3.66E-05 down   |

|          |            |            |            |            |      |
|----------|------------|------------|------------|------------|------|
| CNTFR    | -1.0451828 | 1.07369905 | 2.61E-06   | 8.49E-06   | down |
| RNF11    | -1.0443195 | 4.37920565 | 1.68E-18   | 1.60E-17   | down |
| ENG      | -1.044105  | 5.01597493 | 1.78E-14   | 1.25E-13   | down |
| BTBD19   | -1.0439808 | 1.01411812 | 1.57E-24   | 2.20E-23   | down |
| GNAL     | -1.0430758 | 0.60823025 | 2.71E-43   | 9.55E-42   | down |
| TTYH1    | -1.0416557 | 0.4802098  | 9.45E-16   | 7.33E-15   | down |
| KCNK3    | -1.0413483 | 0.5527293  | 3.49E-18   | 3.23E-17   | down |
| SMAD9    | -1.0394097 | 1.64039883 | 5.00E-10   | 2.40E-09   | down |
| PRRT2    | -1.0388858 | 0.65318718 | 7.57E-32   | 1.60E-30   | down |
| JADE2    | -1.0386541 | 1.85855665 | 1.69E-18   | 1.60E-17   | down |
| SYT11    | -1.0383165 | 2.40778509 | 6.34E-09   | 2.74E-08   | down |
| RUNDC3B  | -1.0381454 | 0.59910607 | 1.32E-27   | 2.23E-26   | down |
| AGPAT9   | -1.0381386 | 0.80624937 | 1.60E-16   | 1.32E-15   | down |
| PDE1A    | -1.0380357 | 0.68457357 | 3.30E-30   | 6.39E-29   | down |
| C14orf28 | -1.0376202 | 0.96213815 | 2.64E-54   | 1.68E-52   | down |
| NEDD4    | -1.0372569 | 0.66584141 | 1.95E-44   | 7.27E-43   | down |
| RPL22    | -1.0368732 | 5.56072548 | 5.61E-15   | 4.09E-14   | down |
| ETS1     | -1.0365067 | 2.79504988 | 1.67E-13   | 1.08E-12   | down |
| TACR1    | -1.0363603 | 0.64843295 | 7.23E-15   | 5.24E-14   | down |
| TMEM158  | -1.0356643 | 2.58131562 | 1.55E-06   | 5.16E-06   | down |
| ROBO3    | -1.035527  | 0.68128054 | 4.95E-20   | 5.25E-19   | down |
| GULP1    | -1.0342215 | 1.15969591 | 1.63E-17   | 1.44E-16   | down |
| FAM117A  | -1.0341039 | 2.56000453 | 1.00E-24   | 1.42E-23   | down |
| FAM13C   | -1.0335891 | 0.46017805 | 5.19E-47   | 2.21E-45   | down |
| FLRT2    | -1.0319522 | 0.33808536 | 1.69E-58   | 1.33E-56   | down |
| NPTN     | -1.0314363 | 4.45597699 | 3.49E-20   | 3.74E-19   | down |
| NEK9     | -1.0308012 | 2.74084144 | 1.20E-23   | 1.60E-22   | down |
| GUCY1B3  | -1.0303355 | 2.07904742 | 1.98E-12   | 1.18E-11   | down |
| IL17RD   | -1.0302698 | 2.18472989 | 3.51E-08   | 1.40E-07   | down |
| WFIKKN2  | -1.0276058 | 0.1955731  | 2.09E-27   | 3.51E-26   | down |
| PABPC5   | -1.0275271 | 0.20776686 | 1.98E-119  | 3.90E-116  | down |
| DUSP26   | -1.0270176 | 0.4378834  | 4.22E-22   | 5.15E-21   | down |
| CEP68    | -1.0259019 | 2.15228785 | 6.07E-31   | 1.23E-29   | down |
| WFS1     | -1.0257047 | 4.7400795  | 6.24E-09   | 2.70E-08   | down |
| GSTM1    | -1.0251602 | 1.67605043 | 0.00061001 | 0.00145259 | down |
| PLS3     | -1.0250903 | 3.82982788 | 8.74E-10   | 4.11E-09   | down |
| HERC5    | -1.0225685 | 1.58518193 | 1.38E-08   | 5.75E-08   | down |
| TM4SF1   | -1.0225653 | 4.51302385 | 6.44E-07   | 2.25E-06   | down |
| HOXD4    | -1.022342  | 0.50598834 | 2.47E-19   | 2.48E-18   | down |
| DNAJC18  | -1.0220949 | 1.24536799 | 3.07E-35   | 7.52E-34   | down |
| ZDBF2    | -1.0213213 | 0.40090695 | 2.30E-26   | 3.62E-25   | down |
| EPS8     | -1.0209852 | 2.70296656 | 1.27E-11   | 7.02E-11   | down |
| FAM19A5  | -1.0208617 | 1.53352169 | 4.85E-07   | 1.72E-06   | down |
| GRIK5    | -1.0203406 | 1.09379726 | 1.32E-07   | 4.96E-07   | down |
| C1QTNF4  | -1.0190529 | 0.57434295 | 4.90E-26   | 7.58E-25   | down |

|          |            |            |           |           |      |
|----------|------------|------------|-----------|-----------|------|
| ADCYAP1R | -1.0189437 | 1.6392078  | 5.22E-05  | 0.0001452 | down |
| MTMR11   | -1.0182379 | 1.69665957 | 3.28E-20  | 3.52E-19  | down |
| CLSTN2   | -1.0181026 | 0.80044401 | 1.17E-12  | 7.04E-12  | down |
| VIM      | -1.0179497 | 7.83791475 | 2.20E-05  | 6.42E-05  | down |
| P2RY14   | -1.0167284 | 0.62577061 | 2.69E-18  | 2.51E-17  | down |
| CD109    | -1.0166562 | 1.36031755 | 7.33E-09  | 3.15E-08  | down |
| FGF10    | -1.0161312 | 0.13678345 | 2.77E-77  | 5.47E-75  | down |
| KCNN3    | -1.015693  | 0.6677842  | 9.30E-27  | 1.50E-25  | down |
| KITLG    | -1.0151415 | 1.58457467 | 5.16E-09  | 2.26E-08  | down |
| PENK     | -1.0148774 | 0.14897088 | 1.13E-21  | 1.34E-20  | down |
| PPP1R15A | -1.0145063 | 4.76633343 | 4.27E-14  | 2.90E-13  | down |
| FSTL3    | -1.0142942 | 2.39263531 | 1.71E-09  | 7.82E-09  | down |
| LDB3     | -1.0127745 | 0.4392939  | 7.38E-29  | 1.33E-27  | down |
| SYNC     | -1.0127158 | 0.35133672 | 1.96E-59  | 1.61E-57  | down |
| EDA2R    | -1.0125656 | 0.6671133  | 4.22E-27  | 6.98E-26  | down |
| ITM2B    | -1.0122728 | 5.71764529 | 2.71E-14  | 1.87E-13  | down |
| ARID5B   | -1.0122186 | 3.15058689 | 1.59E-14  | 1.12E-13  | down |
| ARHGEF10 | -1.0119215 | 1.54008006 | 1.09E-22  | 1.39E-21  | down |
| AXIN2    | -1.0118255 | 2.45278505 | 2.51E-06  | 8.18E-06  | down |
| VWA7     | -1.0104648 | 1.26386679 | 4.16E-11  | 2.21E-10  | down |
| CAMK2A   | -1.0093442 | 0.13183803 | 2.86E-125 | 1.13E-121 | down |
| RBFOX3   | -1.0088629 | 0.24912729 | 7.26E-38  | 2.05E-36  | down |
| ADAMTSL3 | -1.0081016 | 0.54787725 | 6.14E-20  | 6.44E-19  | down |
| SERTAD4  | -1.0076278 | 1.40733337 | 3.60E-10  | 1.75E-09  | down |
| MPV17L   | -1.0074254 | 0.80625525 | 1.33E-13  | 8.69E-13  | down |
| SPRY1    | -1.0068231 | 3.75046214 | 7.23E-09  | 3.11E-08  | down |
| FSTL1    | -1.0066224 | 4.57983629 | 4.62E-09  | 2.03E-08  | down |
| SLC9B2   | -1.0064178 | 0.93449785 | 9.23E-37  | 2.45E-35  | down |
| SMAD3    | -1.0062925 | 2.46057378 | 2.17E-19  | 2.19E-18  | down |
| AKAP13   | -1.005735  | 2.40274332 | 1.15E-25  | 1.74E-24  | down |
| RPS3A    | -1.0050962 | 7.13667625 | 7.22E-12  | 4.08E-11  | down |
| EMP1     | -1.0045953 | 2.99120616 | 1.88E-06  | 6.23E-06  | down |
| ZFP36L2  | -1.0045197 | 5.95951149 | 4.01E-12  | 2.32E-11  | down |
| NUAK1    | -1.004145  | 1.61482127 | 7.30E-15  | 5.29E-14  | down |
| ATRNL1   | -1.0039015 | 0.50969274 | 2.96E-19  | 2.96E-18  | down |
| TUBA1A   | -1.0037371 | 6.00110884 | 9.03E-07  | 3.10E-06  | down |
| SESN1    | -1.0036461 | 2.24665611 | 2.67E-20  | 2.88E-19  | down |
| TCF7L2   | -1.0030235 | 2.69067598 | 3.14E-13  | 1.99E-12  | down |
| SDC2     | -1.0029821 | 3.96862307 | 7.69E-07  | 2.66E-06  | down |
| JAK1     | -1.0028413 | 4.04281746 | 1.79E-13  | 1.16E-12  | down |
| EVC2     | -1.0026123 | 1.01119817 | 2.10E-23  | 2.78E-22  | down |
| FBXO21   | -1.002596  | 3.43683711 | 4.35E-18  | 4.00E-17  | down |
| RBL2     | -1.0022838 | 2.6697075  | 9.47E-17  | 7.99E-16  | down |
| EFCC1    | -1.0009608 | 0.9875934  | 1.39E-22  | 1.75E-21  | down |
| KAT2B    | -1.0008303 | 1.71539945 | 5.75E-18  | 5.24E-17  | down |

|       |            |            |          |               |
|-------|------------|------------|----------|---------------|
| AGFG2 | -1.0000005 | 2.30006896 | 1.15E-22 | 1.46E-21 down |
|-------|------------|------------|----------|---------------|
