# Supplementary figures and images for: Comprehensive Analysis of GDF10 Methylation Site-Associated Genes as Prognostic Markers for Endometrial Cancer
Source: Hindawi journal article supplement (doi:10.1155/2022/7117083), 2022-10-10

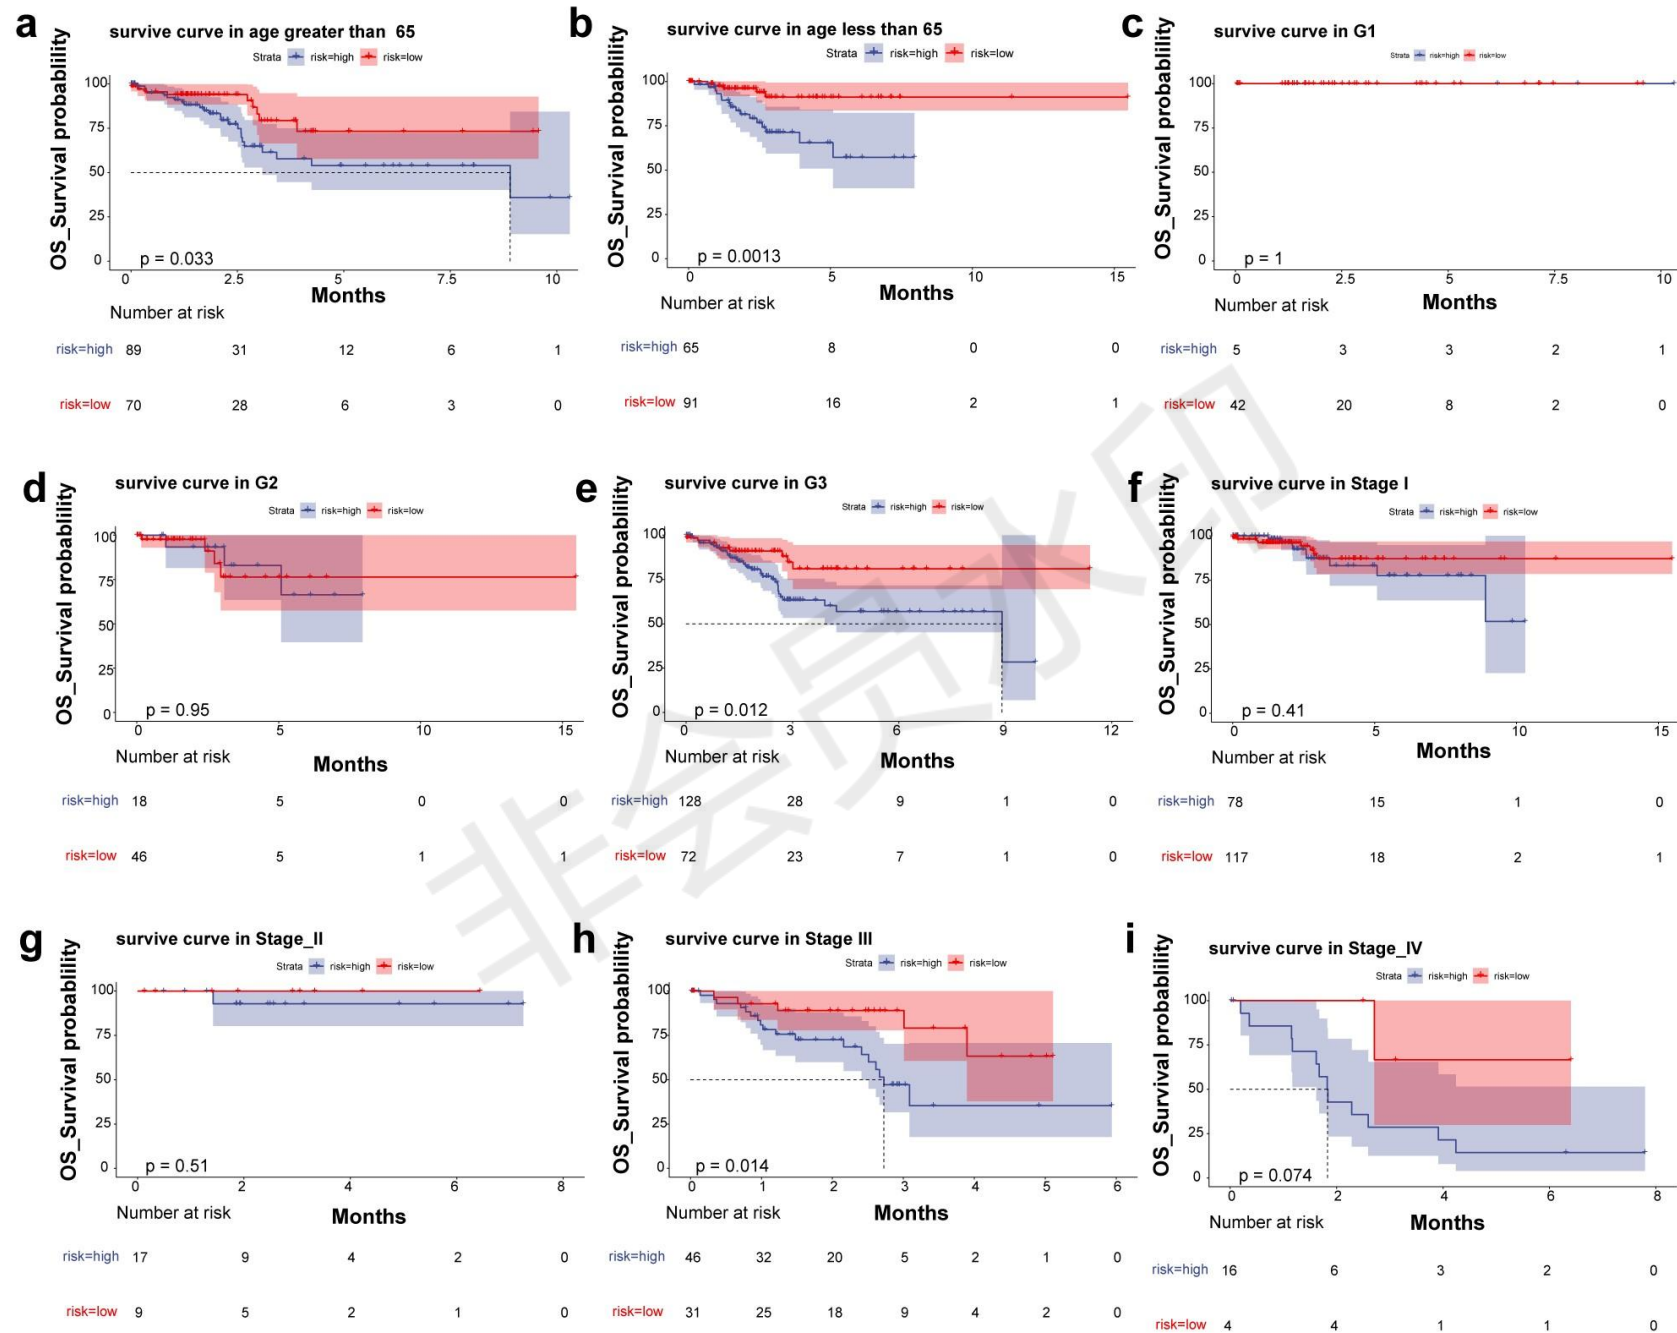

Supplement: f1 [file 7117083.f1.zip]
